# Supplementary material
Source: publisher figshare collection journal article supplement (https://acs.figshare.com/ndownloader/files/9654304)
Supplement: Supplementary file 1 [file 9654304]

**Reinvestigation of the Substitutions Reaction of Stereogenic Phosphoryl Compounds:  
Stereochemistry, Mechanism and Applications**

Li-Juan Liu<sup>a‡</sup>, Wei-Min Wang<sup>a‡</sup>, Lan Yao<sup>a‡</sup>, Fan-Jie Meng<sup>a</sup>, Yong-Ming Sun<sup>a</sup>, Hao Xu<sup>a</sup>,  
Zhong-Yuan Xu<sup>a</sup>, Qiang Li<sup>a</sup>, Chang-Qiu Zhao<sup>a\*</sup> and Li-Biao Han<sup>b\*</sup>

<sup>a</sup>: College of Chemistry and Chemical Engineering, Liaocheng University, Liaocheng, Shandong  
252059, China

<sup>b</sup>: National Institute of Advanced Industrial Science and Technology (AIST), Tsukuba, Ibaraki  
305-8565, Japan

**Contents**

|                                                                                            |           |
|--------------------------------------------------------------------------------------------|-----------|
| <b>Part 1. The substitution of P-Cl bond with alkynyl metallic reagents</b>                | <b>S2</b> |
| <b>Part 2. The comparison of <sup>31</sup>P NMR spectroscopy for 12 and 12'</b>            | <b>S5</b> |
| <b>Part 3. Crystallography information</b>                                                 | <b>S6</b> |
| <b>Part 4. Selective <sup>1</sup>H, <sup>31</sup>P and <sup>13</sup>C NMR spectroscopy</b> | <b>S8</b> |

## Part 1. The substitution of P-Cl bond with alkynyl metallic reagents.

### Typical procedure for the reaction of **2** with **5a**:

The powder of **2** (0.046 g, 0.147 mmol) was added portionwise within 1 minute to the solution of **3a** that was prepared in situ from addition of *n*BuLi (1.6 M solution in hexane, 0.092 ml, 0.147 mmol) to the solution of phenylethyne (0.016 ml, 0.147 mmol) in ether (1 ml) at 0 °C. Then the mixture was stirred for about 3 h while the temperature elevated to room temperature gradually. Saturated ammonium chloride solution was added, and the mixture was extracted with dichloromethane for three times. The combined organic layer was dried over sodium sulfate, concentrated in vacuo. The residue was used for analysis with NMR. The yields and diastereomeric ratio were estimated by <sup>31</sup>P{<sup>1</sup>H}-NMR spectroscopy based on **2**.

**Table S1. Reaction of **2** with **5a** under various conditions**

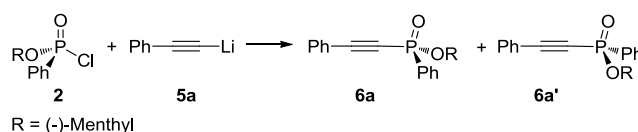

| Entry | Temperature/Time        | Yield % ( <b>6a/6a'</b> ) ( <b>2/2'</b> ) <sup>a</sup> |
|-------|-------------------------|--------------------------------------------------------|
| 1     | 0 °C to rt/3 h          | >99 (89:11) <sup>b</sup>                               |
| 2     | 0 °C to rt/4 h          | 80 (99: 1)                                             |
| 3     | 0 °C/1 h                | 96 (68:32) <sup>c</sup>                                |
| 4     | rt/4 h                  | 95 (53:47)                                             |
| 5     | −80 °C/1 h; to rt/16 h  | 96 (45:55) <sup>c,d</sup>                              |
| 6     | −20 °C/5 min; to rt/5 h | >99 (70:30) <sup>c, d</sup>                            |
| 7     | −20 °C/1 h; to rt/16 h  | 91 (40:60) <sup>d</sup>                                |
| 8     | −20 °C/9 h; rt/1 h      | 99 (42: 58)                                            |
| 9     | −20 °C/9 h; rt/16 h     | 99 (40: 60)                                            |
| 10    | −20 °C/9 h              | 97 (51:49) <sup>e</sup>                                |
| 11    | −45 °C/8 h              | 99 (>99:1)                                             |
| 12    | −15 °C/2.5 h; rt/5 min  | 99 (51:49) <sup>f</sup>                                |
| 13    | 0 °C/20 min; rt /2.5 h  | 37 (69:31) (68:32) <sup>c, g</sup>                     |
| 14    | −15 °C /3 h; rt/5 min   | 63 (80:20) (81:19) <sup>g</sup>                        |
| 15    | −15 °C /3 h; rt/16 h    | 64 (83:17) (50:50) <sup>g</sup>                        |
| 16    | −20 °C /3 h; rt/5 min   | 61 (62:38) (91:9) <sup>g</sup>                         |

<sup>a</sup> In a typical procedure, the powder of **2** was added portionwise within 1 minute to the solution of **5a**. The yields and dr were estimated by the peaks' integrations on <sup>31</sup>P and proton NMR spectroscopy. The data in second parentheses was the ratio of unconsumed **2/2'** (if applicable). <sup>b</sup> **5a** was added to the solution of **2** (0.147 M in ether). <sup>c</sup> Solid of **2** added in one portion. <sup>d</sup> The mixture was warmed from an ice-water bath to rt. <sup>e</sup> The mixture was quenched with acetic acid at −20 °C. <sup>f</sup> Both two reactants were used in 0.0735 M solution of ether. <sup>g</sup> The ratio of **5a/2** was 1:2.

A diastereomeric mixture of (*S*<sub>P</sub>)-**2**/ (*R*<sub>P</sub>)-**2'** reacted with phenylethynyl lithium **5a**, affording two stereoisomers of *O*-menthyl phenyl (phenylethynyl) phosphinate **6a** and **6a'** whose <sup>31</sup>P-NMR signals were observed at 7.78 (s) and 9.37 ppm (s), respectively. The yield and dr (ratio of **6a/6a'**) for the reaction of optically pure (*S*<sub>P</sub>)-**2** with **5a** under various conditions were examined (Table S-1). When **2** was slowly added to **5a** at 0 °C, **6a** was formed with greater than 99:1 dr. The

reverse addition resulted in poor dr (entries 1–3), which indicated the dr was sensitive to the stoichiometry of the two starting materials. In entries 1 to 11, a temperature dependence of the dr was observed. When the reaction was carried out at either rt or  $-20\text{ }^{\circ}\text{C}$  (entries 4 to 10), poor dr was obtained. When **2** and **5a** were mixed at  $-80\text{ }^{\circ}\text{C}$ , then gradually warmed to rt, **6a/6a'** were still formed with poor dr (entry 5), in contrast to the normal thinking that better selectivity is obtained at low temperature, as seen in Imamoto's reaction at  $-78\text{ }^{\circ}\text{C}$ . However, when **2** and **5a** were stirred at  $-45\text{ }^{\circ}\text{C}$  for enough time (8 h), **6a** was formed in near quantitative conversion and  $>99 : 1$  dr (entry 11).

After **2** and **5a** were mixed at  $-80\text{ }^{\circ}\text{C}$  in ether, the solution was monitored with  $^{31}\text{P}$ -NMR spectral. At beginning stage at rt, only the peak of **6a** was observed. The peaks of unconsumed **2**, its epimer **2'**, **6a'** and other *P*-containing species were not detected. The peak of **6a'** started to emerge after five minutes, and gradually increased with prolonged time, until 59:41 dr after an hour (Figure S-1).

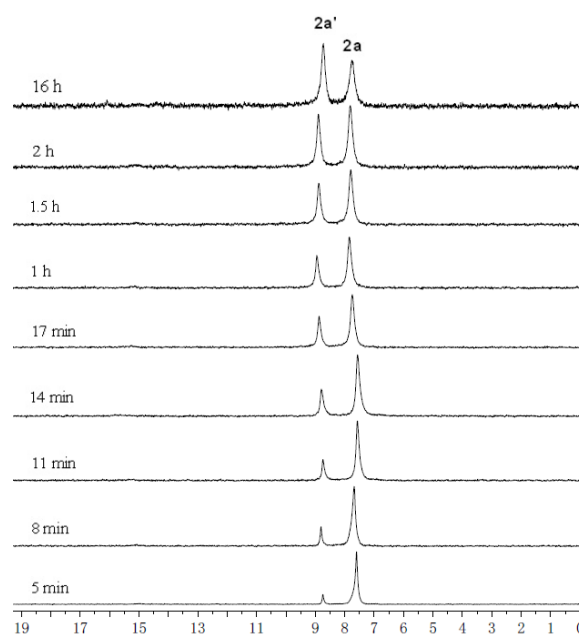

**Figure S1.** Relationship between the formation of **6a/6a'** and the reaction time (in ether).

In dilute solution, **6a'** was not dominantly formed (entry 12). The results indicated a dilute solution, which was developed after formation of **6a**, was not favour for the formation of **6a'**. **6a'** was not produced from the reported chloride-exchange or epimerization of **1**, as proved by no epimerization of **1** was observed in the LiCl-containing solution.

The reaction of 4-methylbenzenethiol with **6a** under alkali condition to afford menthyl (*Z*)-2-(*p*-tolylthio)-2-phenylvinyl (phenyl)phosphinate, whose  $S_{\text{P}}$  configuration was confirmed by X-ray diffraction (Scheme S-1). Because the addition didn't involve in phosphorus atom, the phosphorus atom of **6a** has the same  $R_{\text{P}}$  configuration. On the basis of the above observations, two routes to form **6a** and **6a'** were proposed as *P*-inversed normal  $S_{\text{N}}2$  substitution (route A, to form **6a**) and *P*-retained Berry pseudorotation (BPR, route B, to form **6a'**), respectively.

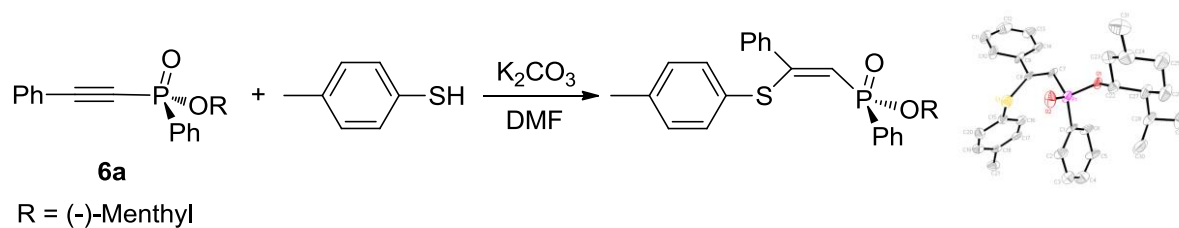

**Scheme S1. The conversion of 6a and the confirmation of its structure.**

Part 2. The comparison of  $^{31}\text{P}$  NMR spectroscopy for **12** and **12'**

Table S2. The comparison of  $^{31}\text{P}$ -NMR spectrum for the  $R_P/S_P$ -**12/12'**.

| entry | R/major product                                           | ( $S_P$ )- <b>12</b>                         | ( $R_P$ )- <b>12'</b>                        |
|-------|-----------------------------------------------------------|----------------------------------------------|----------------------------------------------|
|       |                                                           | $^{31}\text{P}$ -NMR spectrum (ppm):         | $^{31}\text{P}$ -NMR spectrum (ppm):         |
| 1     | Me ( <b>12a</b> )                                         | 40.74 (s, 90 %)                              | 40.05 (s, 10 %).                             |
| 2     | Et ( <b>12b</b> )                                         | 45.19 (s, 98 %)                              | 44.20 (s, 2 %).                              |
| 3     | <i>n</i> -Bu ( <b>12c</b> )                               | 43.97 (s, 98 %)                              | 43.05 (s, 2%).                               |
| 4     | <i>i</i> -Pr ( <b>12d</b> )                               | 47.70.                                       |                                              |
| 5     | <i>cyclo</i> -Hex ( <b>12e</b> )                          | 44.96.                                       |                                              |
| 6     | <i>s</i> -Bu ( <b>12f</b> )                               | 47.17 and 46.79<br>(two single peaks, 88.5%) | 45.86 and 45.62<br>(two single peaks, 11.5%) |
| 7     | <i>t</i> -Bu ( <b>12g</b> )                               | 48.98.                                       |                                              |
| 8     | Bn ( <b>12h</b> )                                         | 38.41.                                       |                                              |
| 9     | allyl ( <b>12i</b> )                                      | 39.02 (s, 98 %)                              | 38.47 (s, 2 %)                               |
| 10    | <i>p</i> -BrC <sub>6</sub> H <sub>4</sub> ( <b>12j</b> )  | ( $R_P$ ) 28.96.                             |                                              |
| 11    | <i>p</i> -ClC <sub>6</sub> H <sub>4</sub> ( <b>12k</b> )  | ( $R_P$ ) 28.84                              |                                              |
| 12    | <b>12k/12k'</b> (from <b>2/2'</b> )                       | ( $R_P$ ) 29.000                             | ( $S_P$ ) 28.955                             |
| 13    | <i>o</i> -MeC <sub>6</sub> H <sub>4</sub> ( <b>12l</b> )  | ( $R_P$ ) 25.67                              |                                              |
| 14    | <b>12m</b>                                                | ( $R_P$ ) 28.84                              |                                              |
| 15    | Me ( <b>12a'</b> )                                        |                                              | 40.41                                        |
| 16    | Et ( <b>12b'</b> )                                        |                                              | 44.20.                                       |
| 17    | <i>n</i> -Bu ( <b>12c'</b> )                              |                                              | 42.99.                                       |
| 18    | <i>i</i> -Pr ( <b>12d'</b> )                              | 47.61 (s, 3%)                                | $\delta$ 46.41 (s, 97%),                     |
| 19    | <i>s</i> -Bu ( <b>12f'</b> )                              | 47.32 and 46.94 (two single<br>peaks, 11%)   | 45.98 and 45.75 (two<br>single peaks, 89%).  |
| 20    | <i>t</i> -Bu ( <b>12g'</b> )                              | 48.99 (s, 13%)                               | 48.19 (s, 87%),                              |
| 21    | Bn ( <b>12h'</b> )                                        |                                              | 37.63                                        |
| 22    | allyl ( <b>12i'</b> )                                     | 39.08 (s, 4%)                                | 38.53 (s, 96%).                              |
| 23    | <i>p</i> -BrC <sub>6</sub> H <sub>4</sub> ( <b>12j'</b> ) | ( $R_P$ ) 29.075 (s, 12%)                    | ( $S_P$ ) 29.036 (s, 88%).                   |
| 34    | <i>o</i> -MeC <sub>6</sub> H <sub>4</sub> ( <b>12l'</b> ) |                                              | ( $S_P$ ) 29.02.                             |
| 25    | <i>p</i> -MeC <sub>6</sub> H <sub>4</sub> ( <b>12n'</b> ) |                                              | ( $S_P$ ) 29.30.                             |

### Part 3. Crystallography information.

**Table S3. Crystallography data of (*S<sub>P</sub>*)-*O*-Menthyl benzylphenylphosphinate (12h) (ORTEP drawing of 12h with thermal ellipsoids at the 30% probability)**

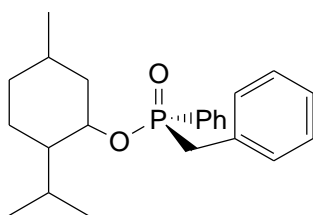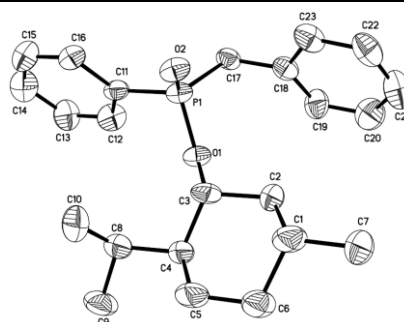

| Empirical formula     | C <sub>23</sub> H <sub>31</sub> N O <sub>2</sub> P |
|-----------------------|----------------------------------------------------|
| Crystal system        | Orthorhombic                                       |
| Space group           | P2 (1)2 (1)2 (1)                                   |
| Formula weight        | 370.45                                             |
| a, Å                  | 5.7278 (6)                                         |
| b, Å                  | 17.5633 (19)                                       |
| c, Å                  | 21.791 (2)                                         |
| α, deg                | 90                                                 |
| β, deg                | 90                                                 |
| γ, deg                | 90                                                 |
| V, Å <sup>3</sup>     | 2192.2 (4)                                         |
| Z                     | 4                                                  |
| T, K                  | 298 (2)                                            |
| λ, Å                  | 0.71073                                            |
| ρ, g cm <sup>-3</sup> | 1.122                                              |
| R <sub>int</sub>      | 0.1094                                             |
| R1 [I N 2σ (I)]       | 0.0522                                             |
| R1 (all data)         | 0.1436                                             |
| wR2 [I N 2σ (I)]      | 0.1184                                             |
| wR2 (all data)        | 0.1655                                             |
| Flack                 | 0.0 (2)                                            |
| CCDC Number           | 1526361                                            |

**Table S4. Crystallography data of (*R<sub>P</sub>*)-*O*-Menthyl benzylphenylphosphinate (12h') (ORTEP drawing of 12h' with thermal ellipsoids at the 30% probability)**

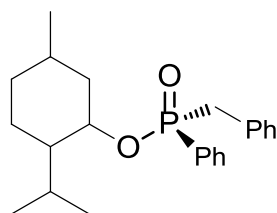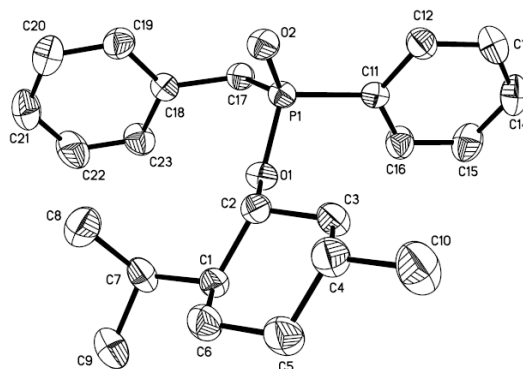

| Empirical formula     | C <sub>23</sub> H <sub>31</sub> N O <sub>2</sub> P |
|-----------------------|----------------------------------------------------|
| Crystal system        | Monoclinic                                         |
| Space group           | P2 (1)                                             |
| Formula weight        | 370.45                                             |
| a, Å                  | 12.4777 (11)                                       |
| b, Å                  | 5.7970 (7)                                         |
| c, Å                  | 15.4190 (19)                                       |
| α, deg                | 90                                                 |
| β, deg                | 100.7270 (10)                                      |
| γ, deg                | 90                                                 |
| V, Å <sup>3</sup>     | 1095.8 (2)                                         |
| Z                     | 2                                                  |
| T, K                  | 298 (2)                                            |
| λ, Å                  | 0.71073                                            |
| ρ, g cm <sup>-3</sup> | 1.123                                              |
| R <sub>int</sub>      | 0.0846                                             |
| R1 [I N 2σ (I)]       | 0.0658                                             |
| R1 (all data)         | 0.0877                                             |
| wR2 [I N 2σ (I)]      | 0.1567                                             |
| wR2 (all data)        | 0.1697                                             |
| Flack                 | -0.17 (16)                                         |
| CCDC Number           | 1526362                                            |

Part 4. Selected  $^1\text{H}$ ,  $^{31}\text{P}$  and  $^{13}\text{C}$  NMR spectroscopy  
 (S<sub>P</sub>)-O-Menthyl phenylphosphonochloridate 2

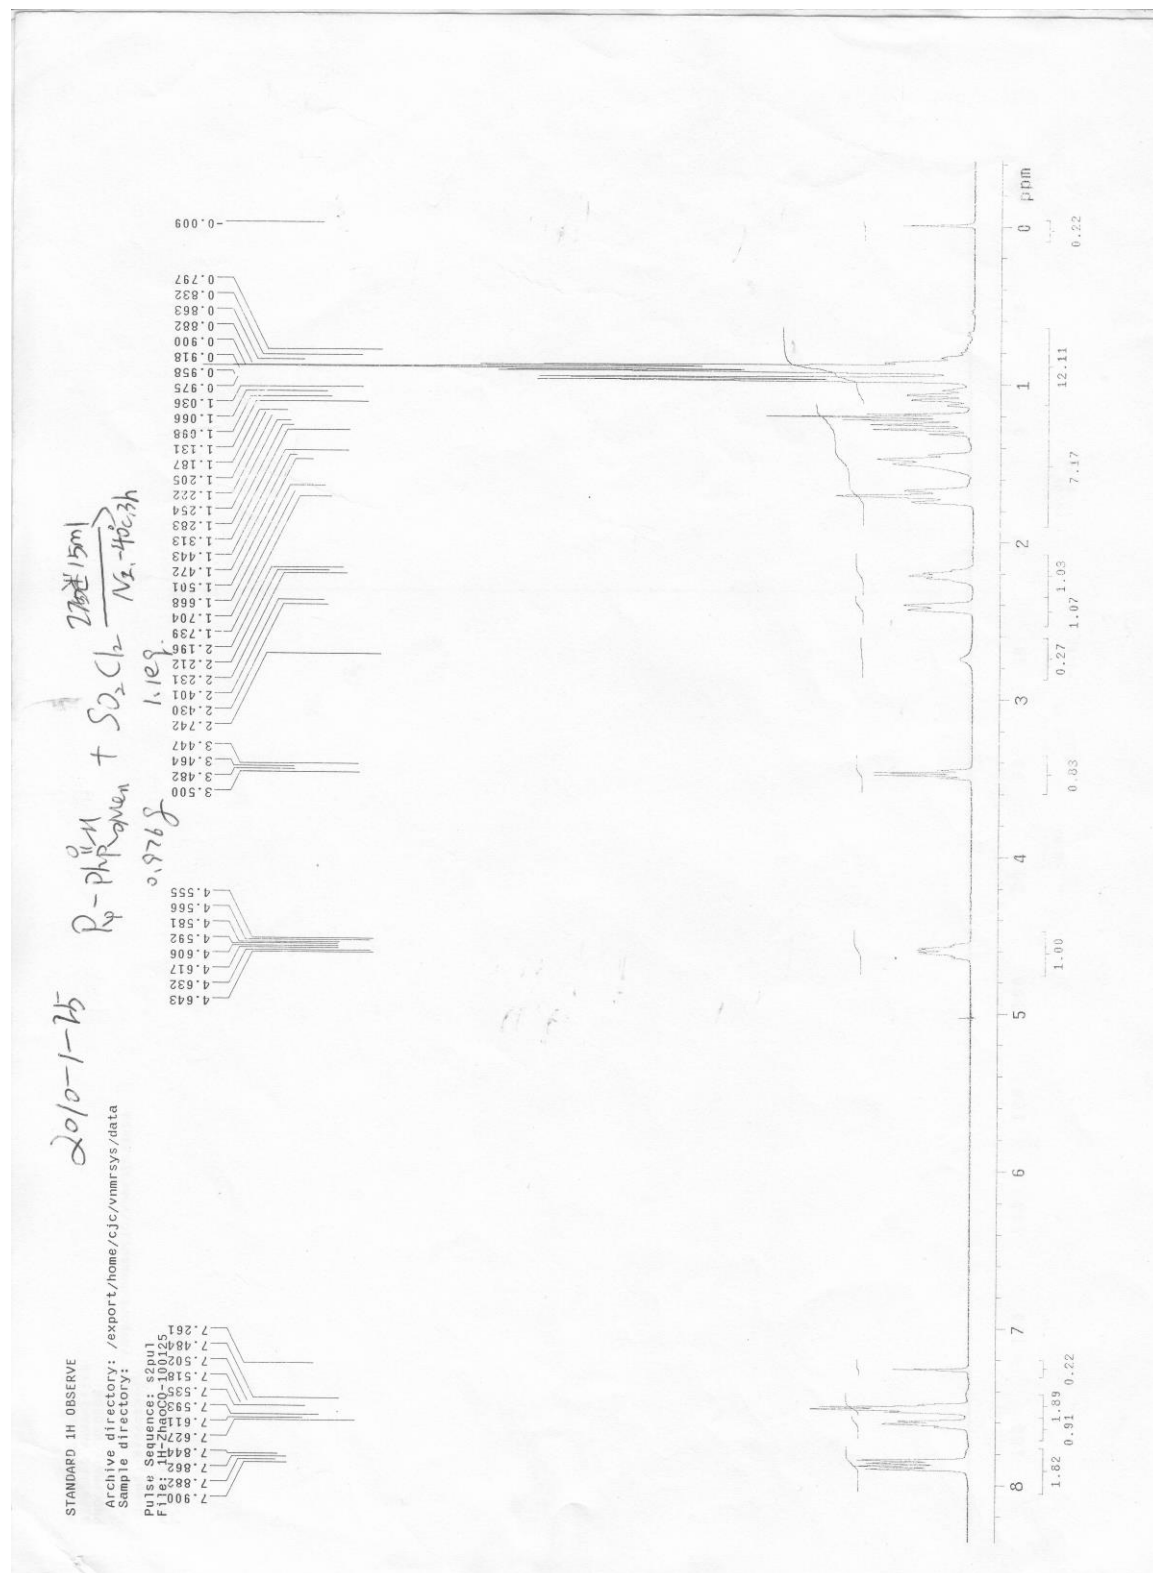



# **(S<sub>P</sub>)-O-Menthyl phenylphosphonochloridate 2**

PHOSPHORUS OBSERVE  
STANDARD PARAMETERS  
PHOSPHATE REGION  
Archive directory: /export/home/cjc/vnmrsys/data  
Sample directory:  
Pulse Sequence: s2pu1  
File: 31P-ZhaoCO-100125

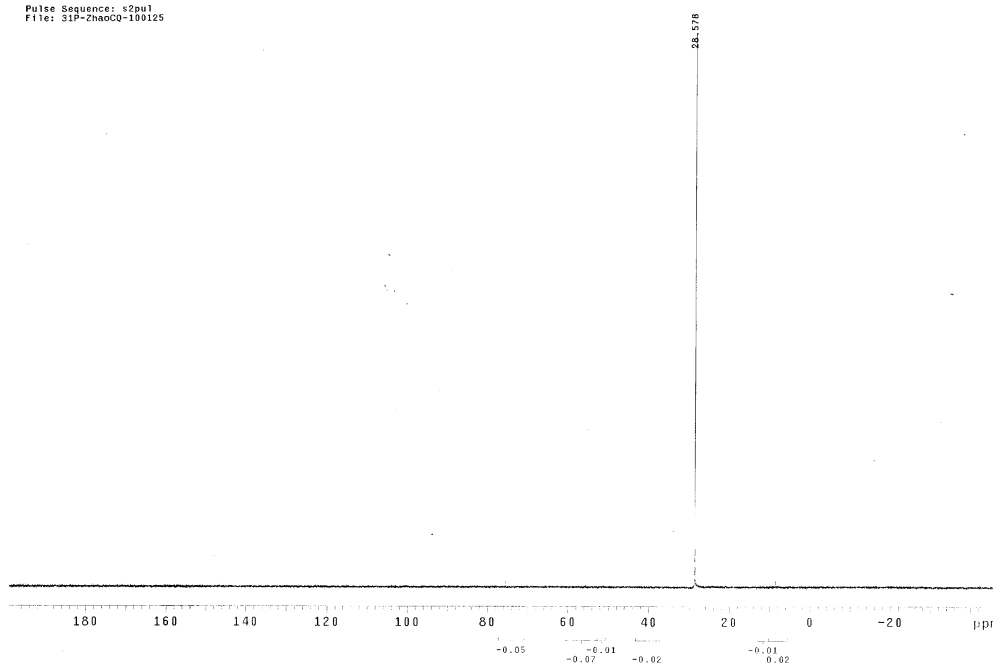

# **(S<sub>P</sub>)-O-Menthyl phenylphosphonochloridate 2**

13C OBSERVE  
Archive directory: /export/home/cjc/vnmrsys/data  
Sample directory:  
Pulse Sequence: s2pu1  
File: 13C-ZhaoCO-11-1-100205

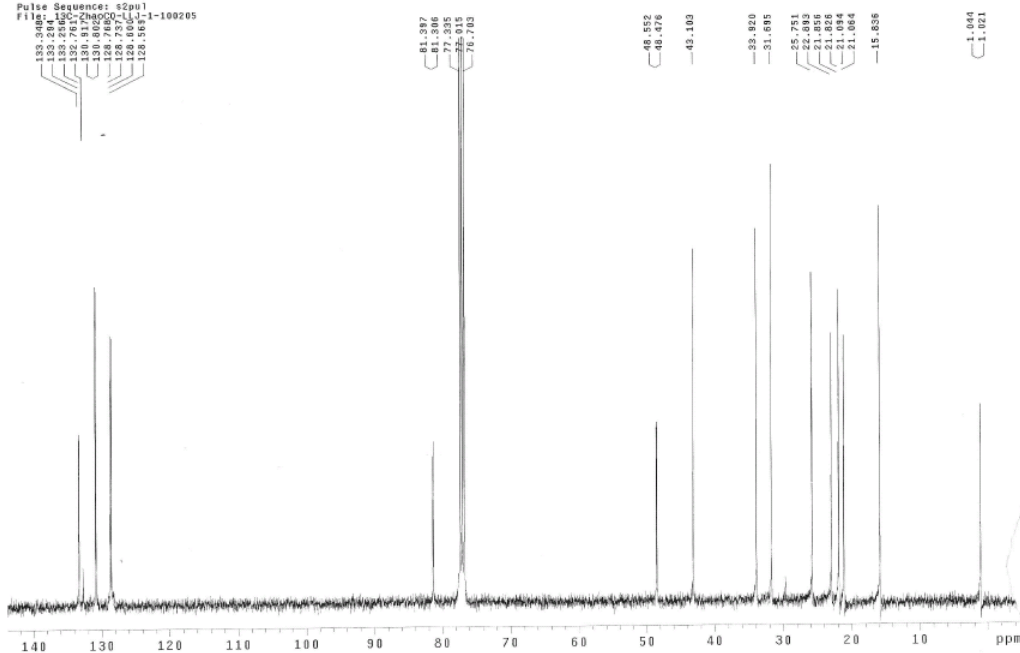

Customer: LCU400 Cons SN: 12106 Feb 5 2010

**(S<sub>P</sub>)-O-Methyl O-menthyl phenylphosphinate 3**

1H-ZhaoCQ-LLJ-419-100713  
STANDARD 1H OBSERVE

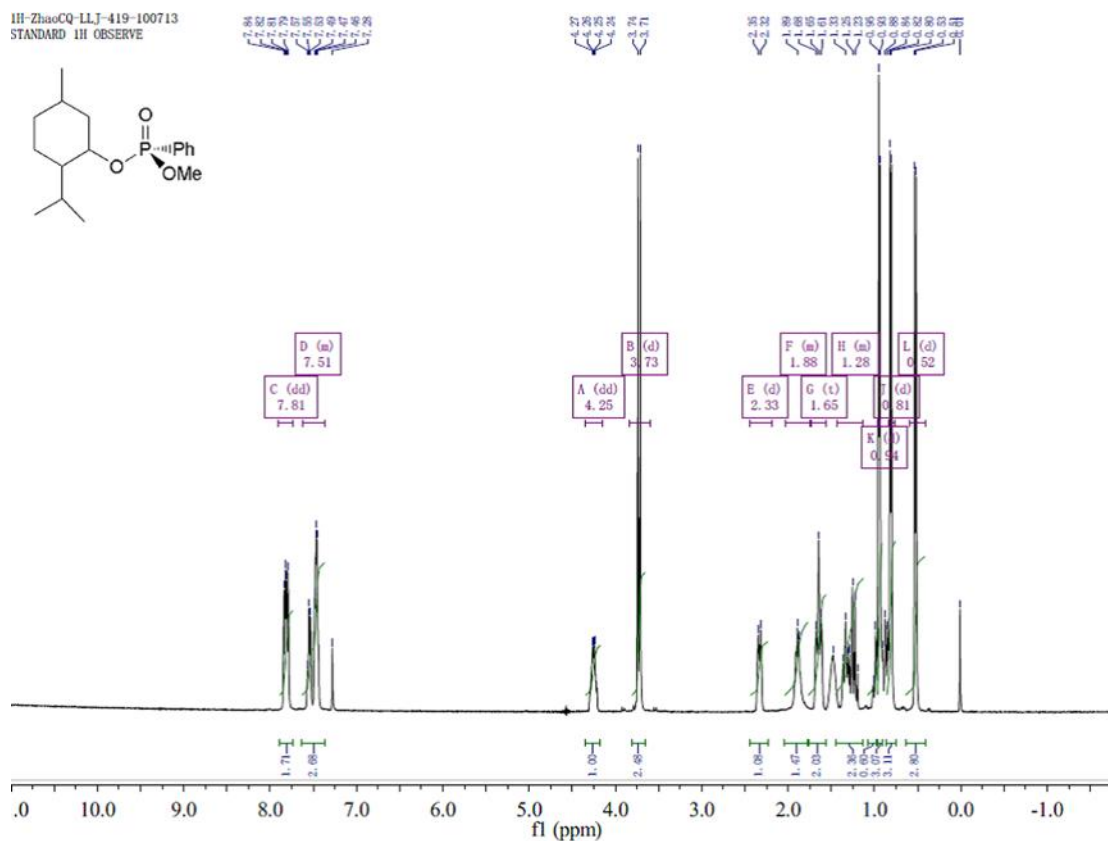

**(S<sub>P</sub>)-O-Methyl O-menthyl phenylphosphinate 3**

1P-ZhaoCQ-LLJ-419-100713  
HOSPHORUS OBSERVE  
TANDARD PARAMETERS  
HOSPHATE REGION

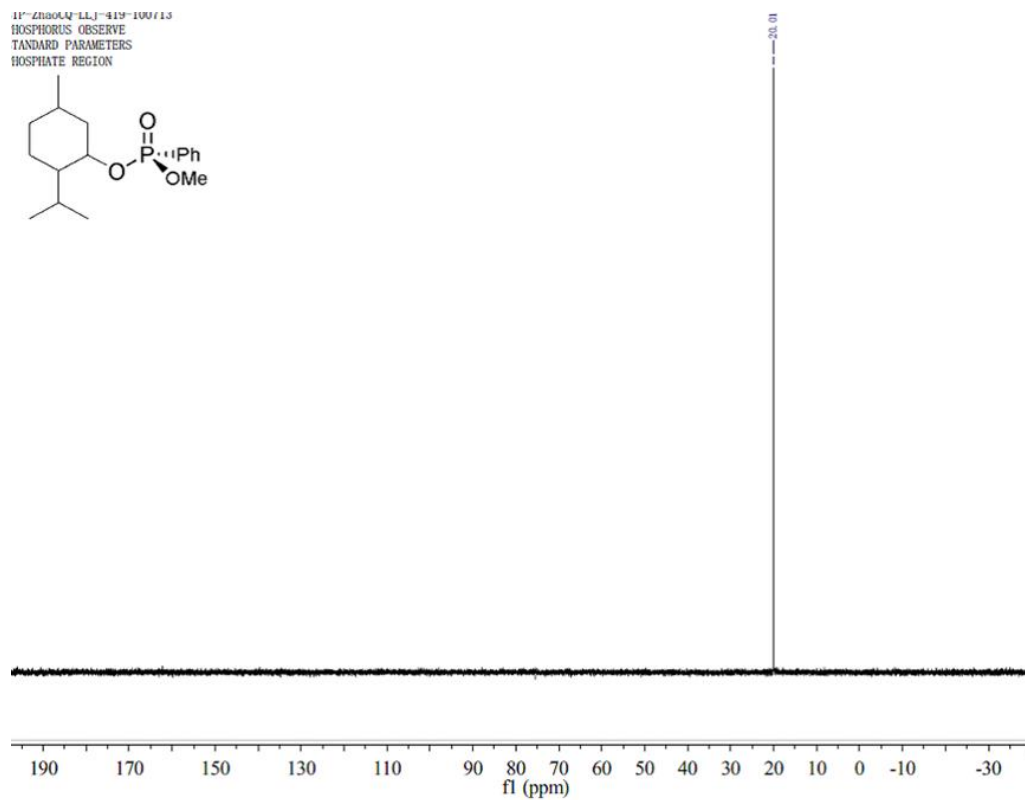

**(S<sub>P</sub>)-O-Methyl O-menthyl phenylphosphinate 3**

13C-ZhaoCQ-LLJ-419-100713  
13C OBSERVE

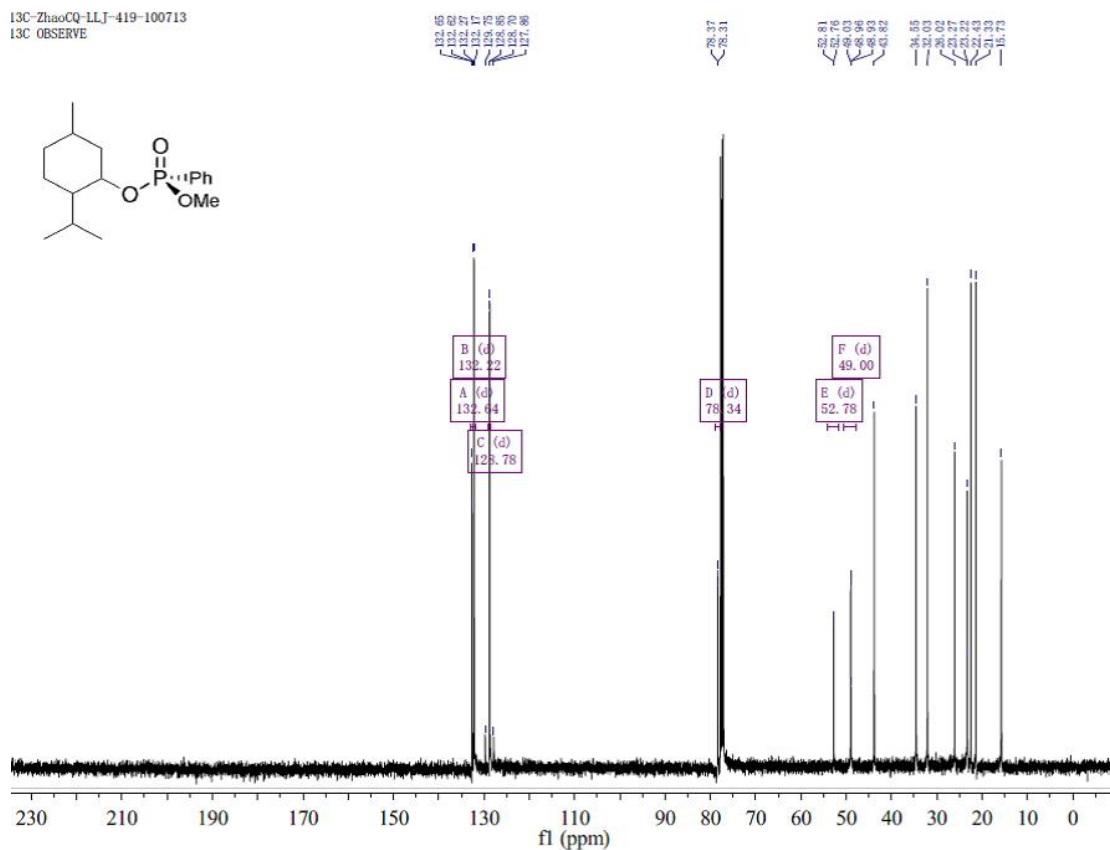

**(S<sub>P</sub>)-O-Menthyl methylphenylphosphinate (12a)**

1H-ZhaoCQ-LLJ-469-101108  
STANDARD 1H OBSERVE

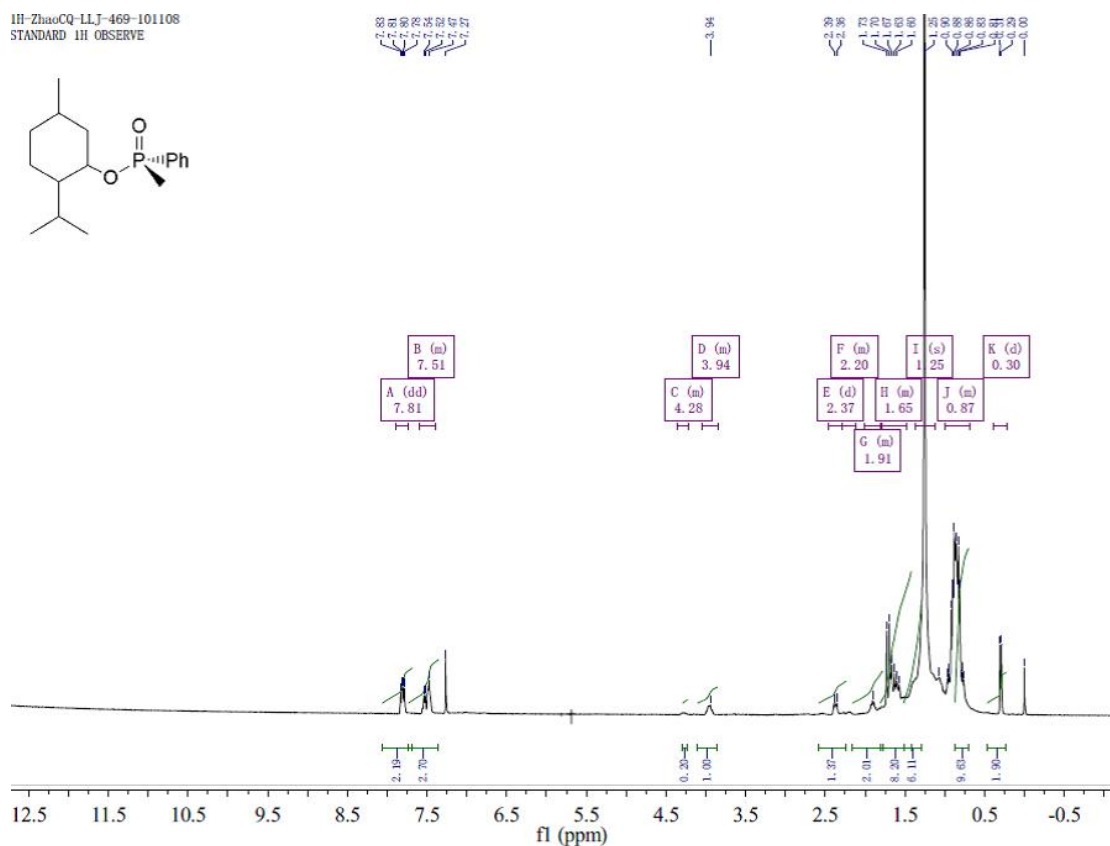

**(*S<sub>P</sub>*)-*O*-Menthyl methylphenylphosphinate (12a)**

31P-ZhaoCQ-LLJ-469-101108  
PHOSPHORUS OBSERVE  
STANDARD PARAMETERS  
PHOSPHATE REGION

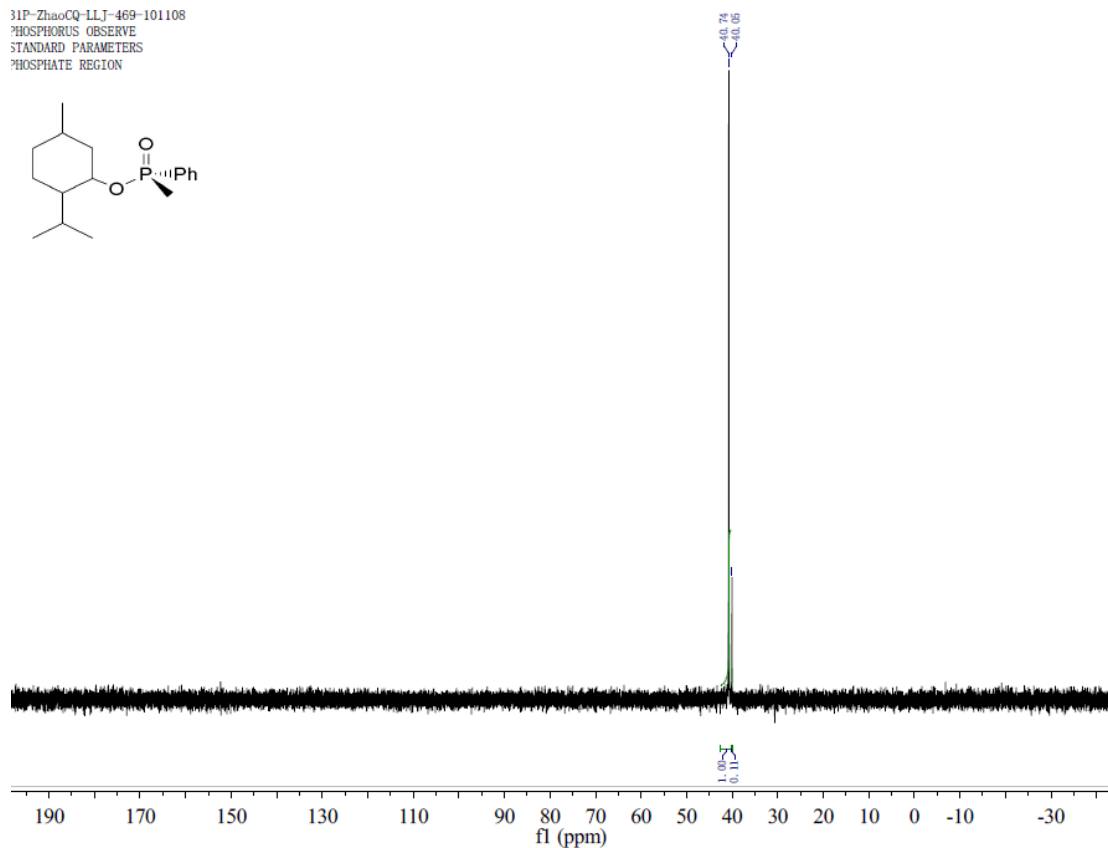

**(*S<sub>P</sub>*)-*O*-Menthyl methylphenylphosphinate (12a)**

13C-ZhaoCQ-LLJ-469-101108  
13C OBSERVE

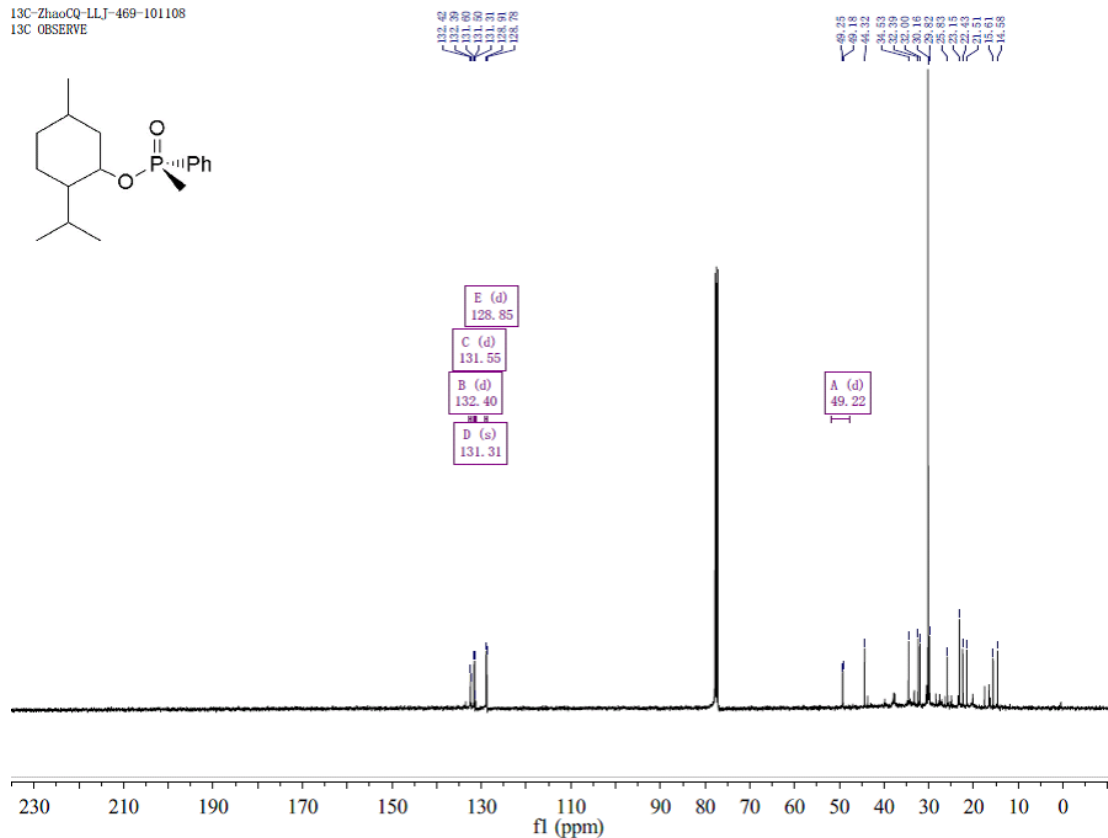

**(S<sub>P</sub>)-O-Menthyl ethylphenylphosphinate (12b)**

1-ZhaoCQ-WM-299-100330  
STANDARD 1H OBSERVE

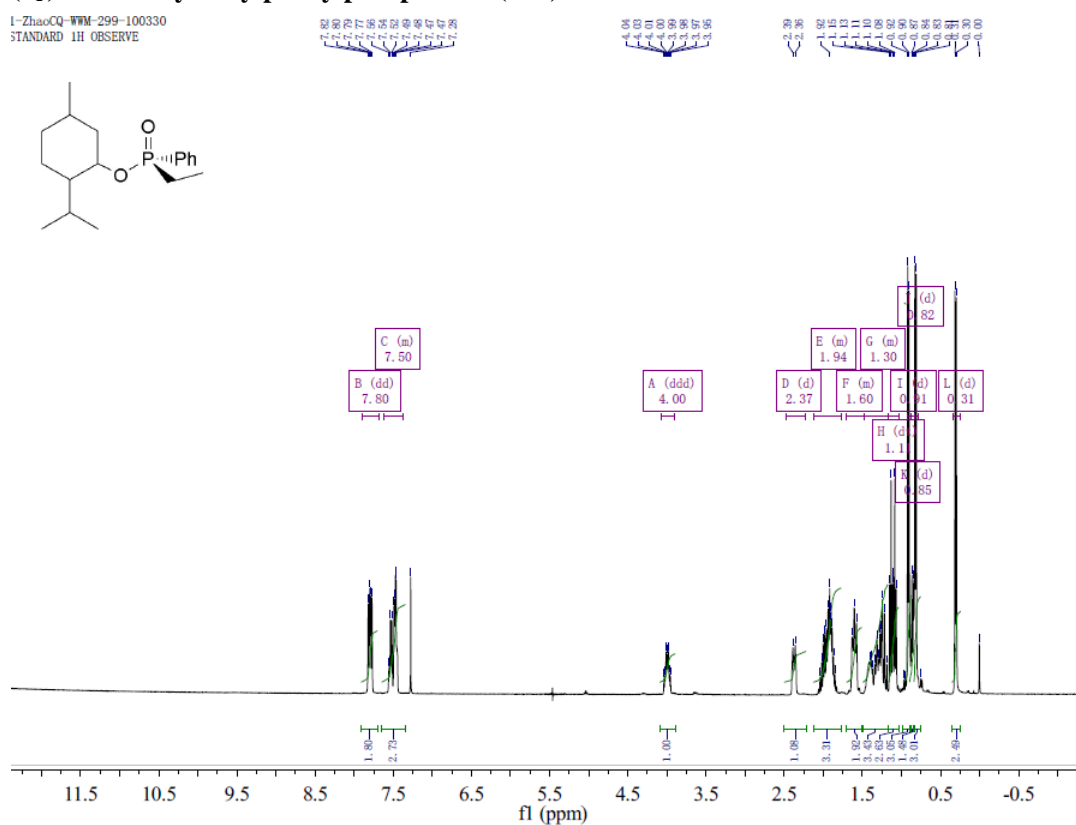

**(S<sub>P</sub>)-O-Menthyl ethylphenylphosphinate (12b)**

31P-ZhaoCQ-WM-294-100309  
PHOSPHORUS OBSERVE  
STANDARD PARAMETERS  
PHOSPHATE REGION

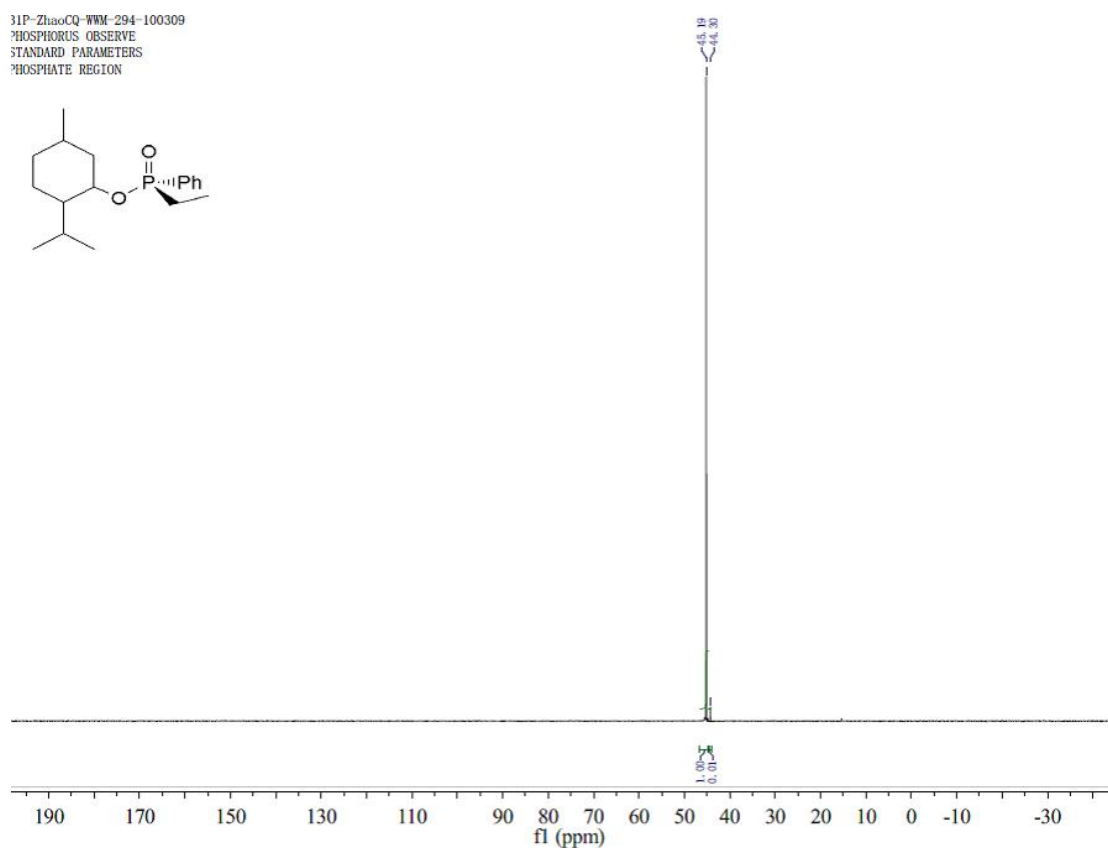

**(*S<sub>P</sub>*)-*O*-Menthyl ethylphenylphosphinate (12b)**

<sup>13</sup>C-ZhaoCQ-WMM-299-100331  
<sup>13</sup>C OBSERVE

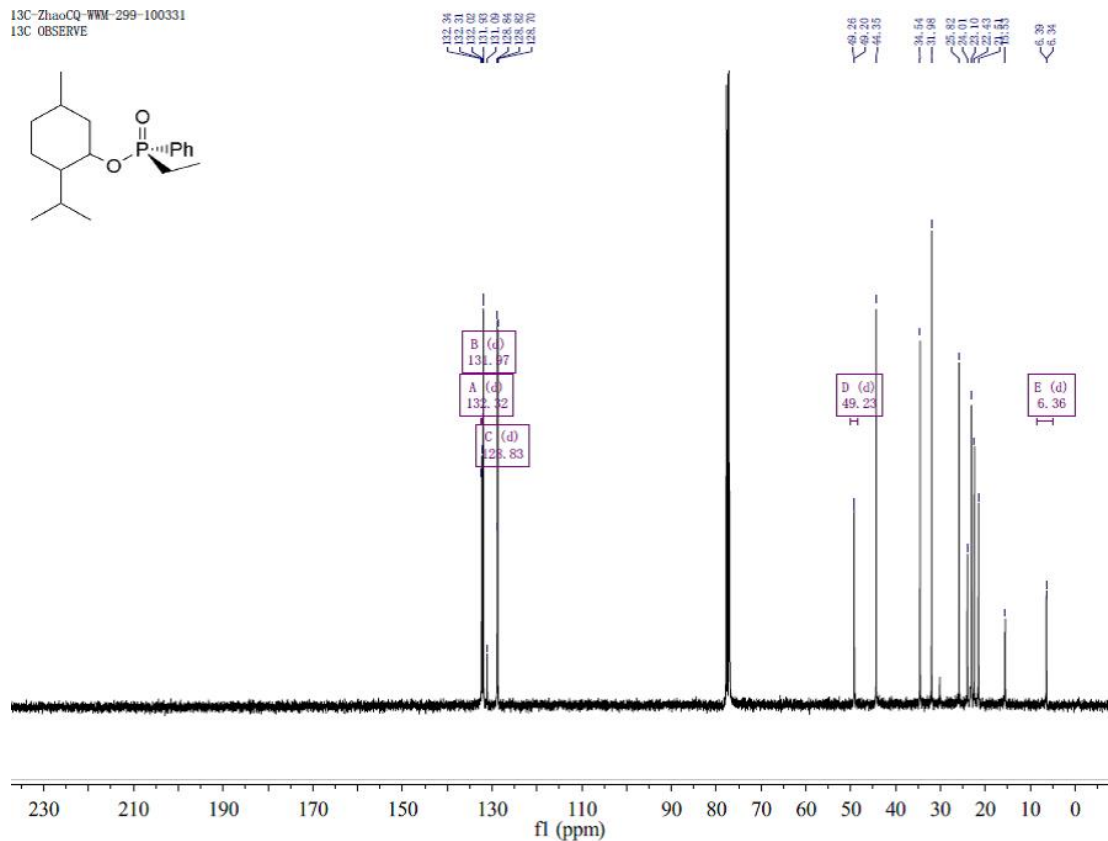

**(*S<sub>P</sub>*)-*O*-Menthyl *n*-butylphenylphosphinate (12c)**

<sup>1</sup>H-ZhaoCQ-LLJ-459-2-101022  
 STANDARD <sup>1</sup>H OBSERVE

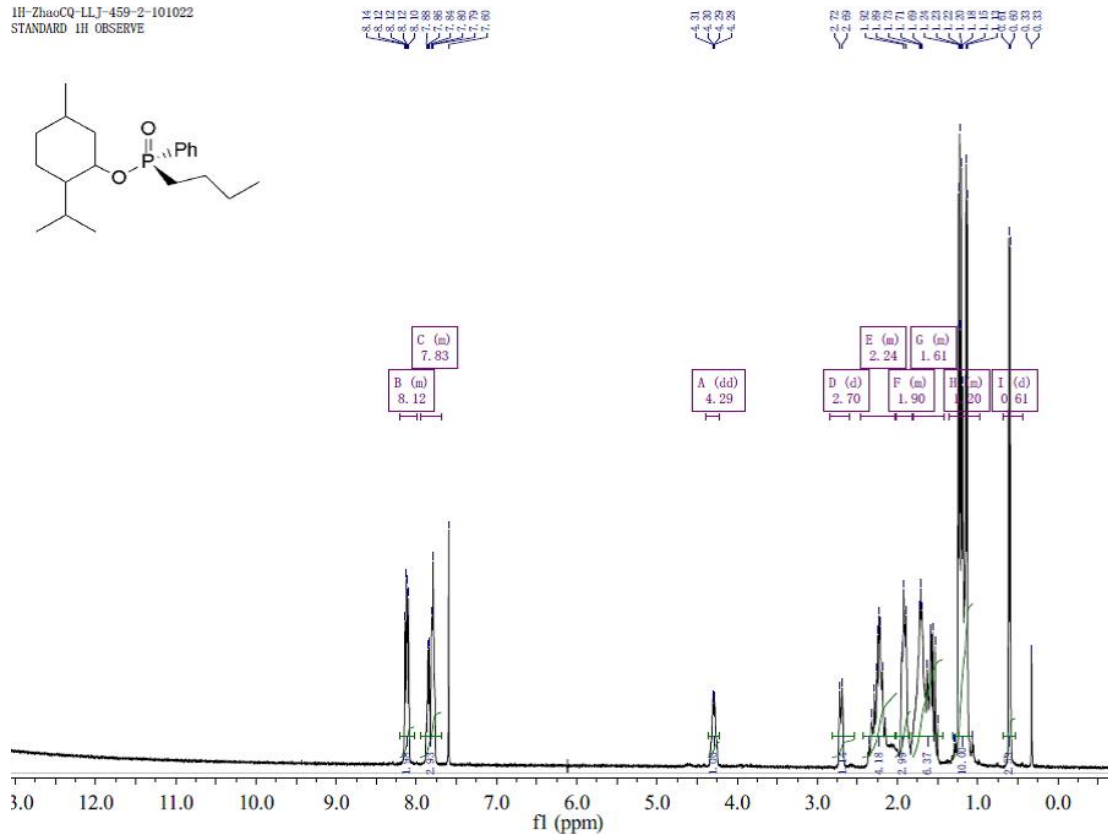

**(S<sub>P</sub>)-O-Menthyl *n*-butylphenylphosphinate (12c)**

<sup>31</sup>P-ZhaoCQ-LLJ-459-2-101022  
<sup>31</sup>P OBSERVE  
 STANDARD PARAMETERS  
 PHOSPHATE REGION

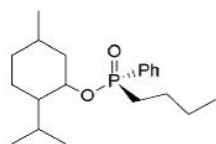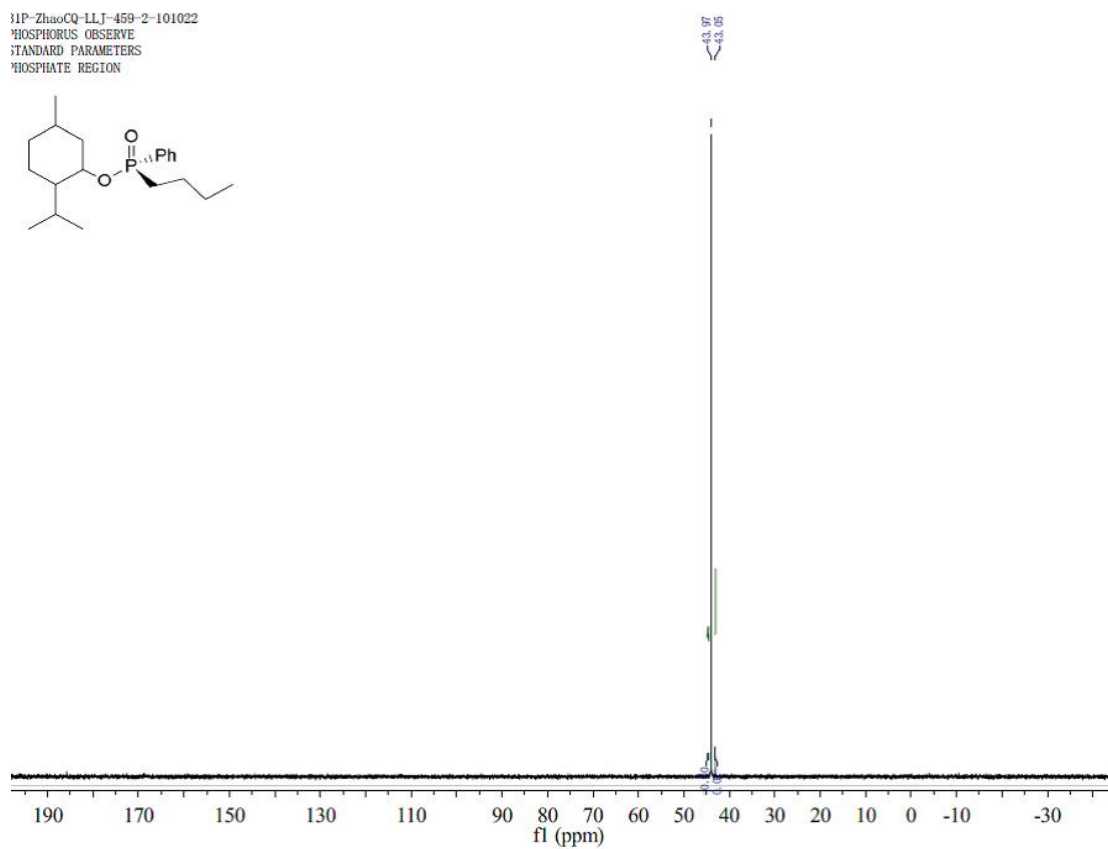

**(S<sub>P</sub>)-O-Menthyl *n*-butylphenylphosphinate (12c)**

<sup>13</sup>C-ZhaoCQ-LLJ-459-101022  
<sup>13</sup>C OBSERVE

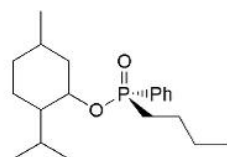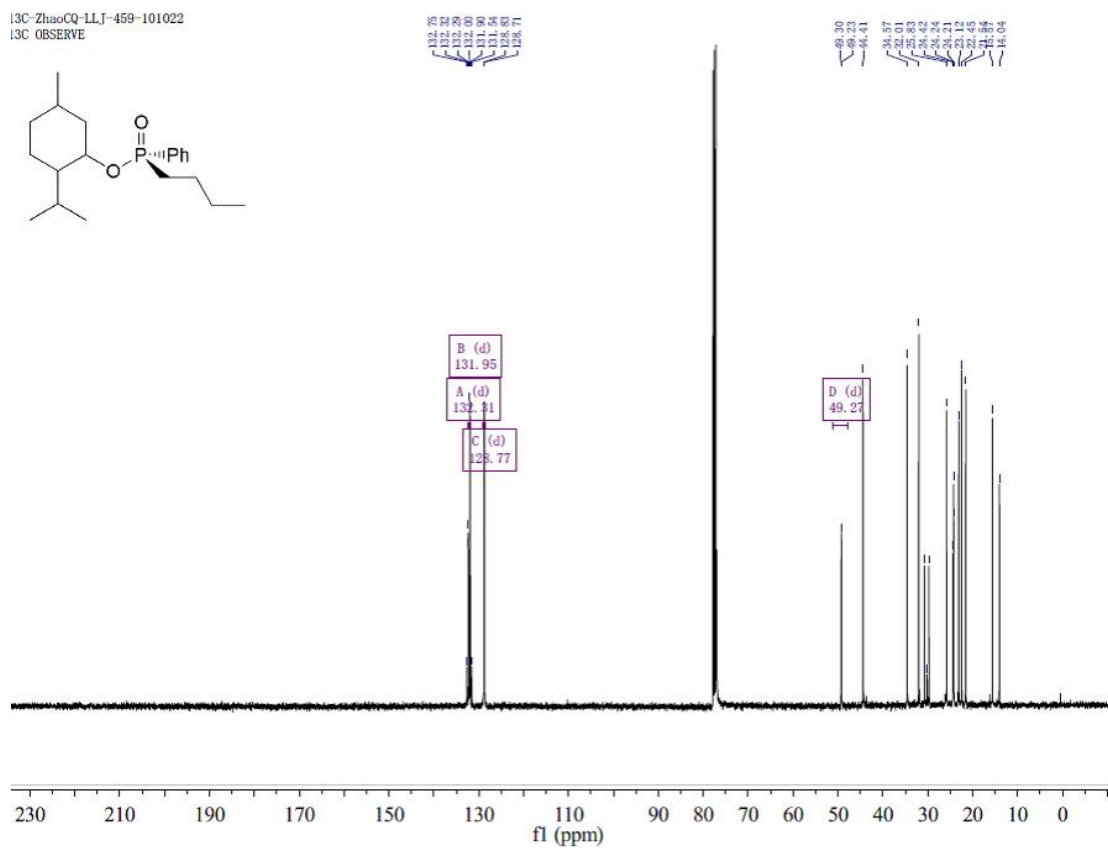

**(*S<sub>P</sub>*)-*O*-Menthyl *i*-propylmethylphenylphosphinate (12d)**

1H-ZHAOCQ-LLJ-453-101019  
STANDARD 1H OBSERVE

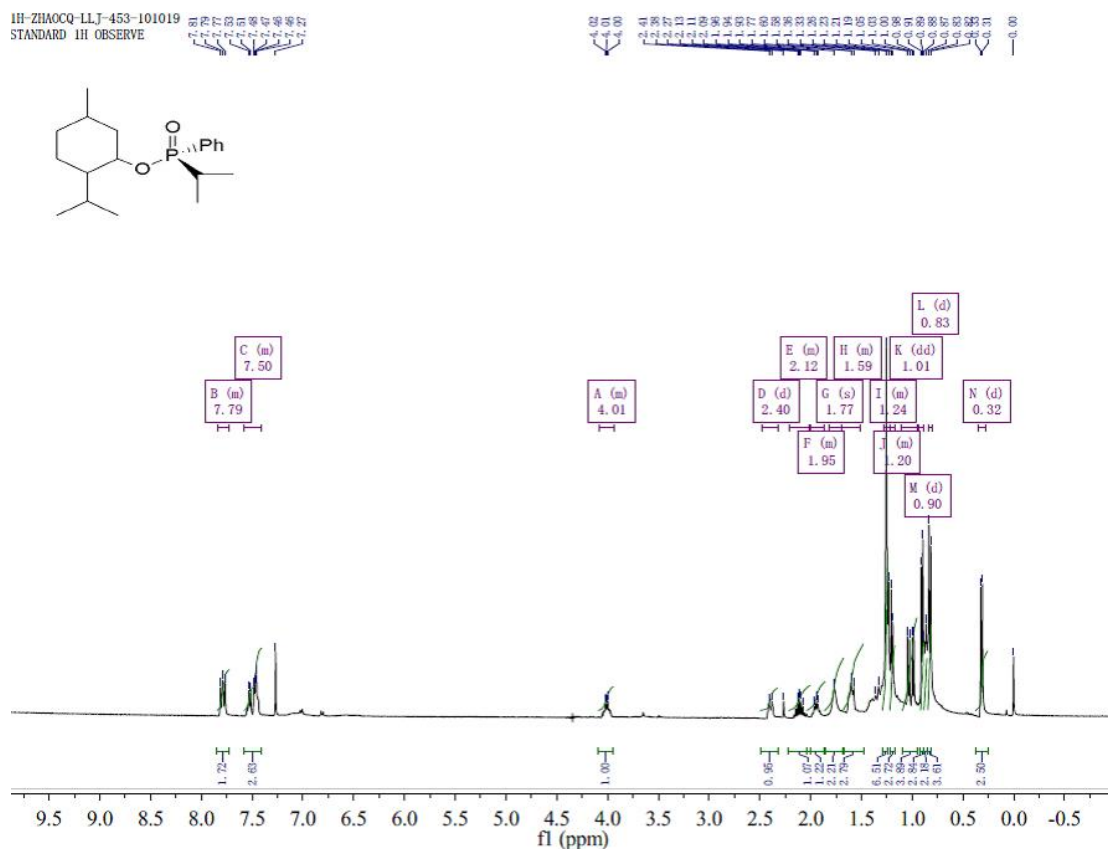

**(*S<sub>P</sub>*)-*O*-Menthyl *i*-propylmethylphenylphosphinate (12d)**

31P-ZhaoCQ-LLJ-453-100930  
PHOSPHORUS OBSERVE  
STANDARD PARAMETERS  
PHOSPHATE REGION

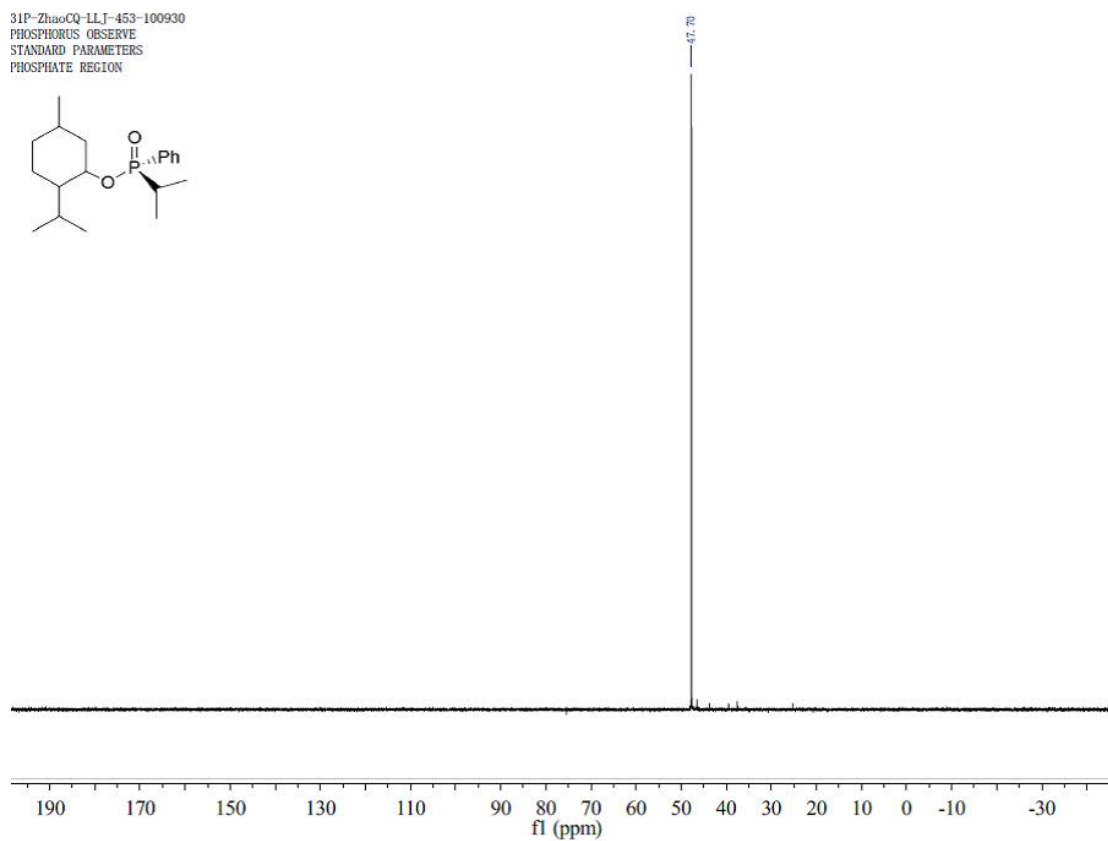



13C-ZhaoCQ-LLJ-453-101022  
13C OBSERVE

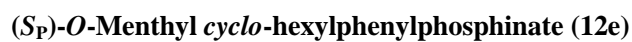1H-ZhaoCQ-LLJ-448-101013  
STANDARD 1H OBSERVE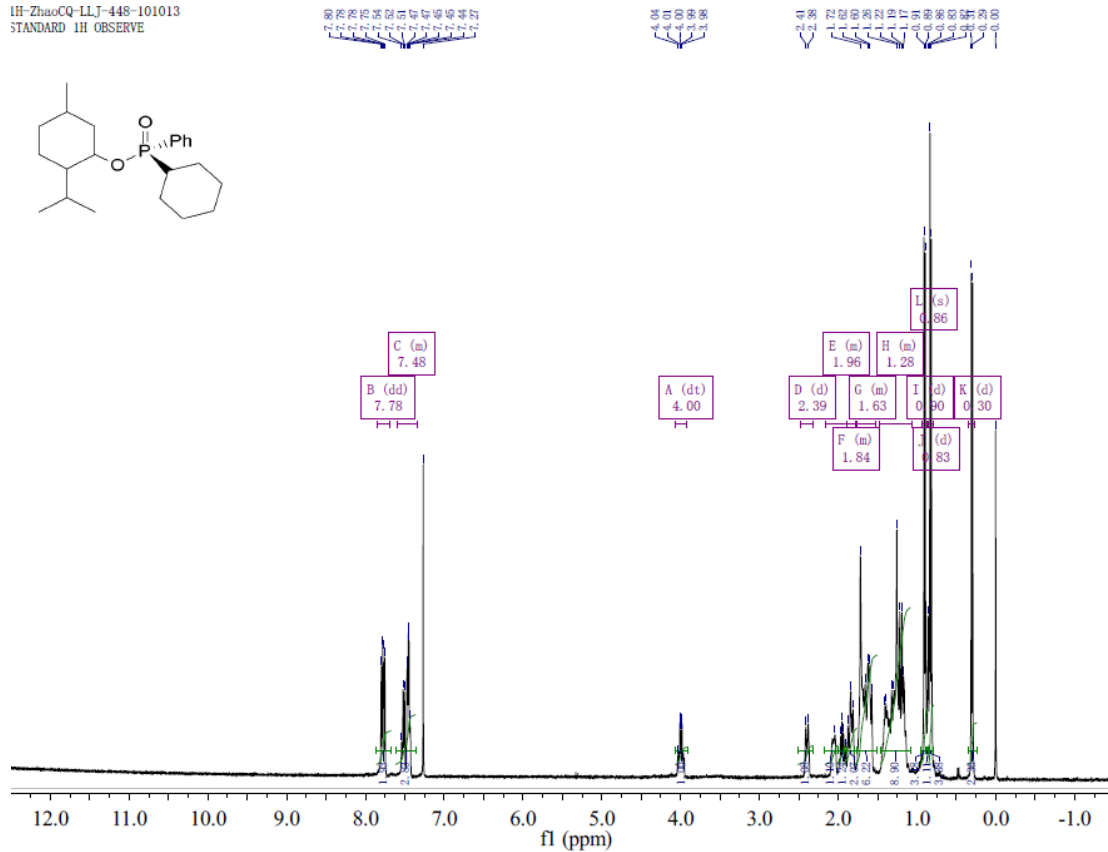

**(*S<sub>P</sub>*)-*O*-Menthyl *cyclo*-hexylphenylphosphinate (12e)**

31P-ZhaoCQ-LLJ-448-101013  
 31P OBSERVE  
 STANDARD PARAMETERS  
 PHOSPHATE REGION

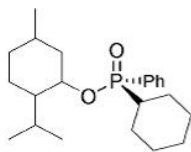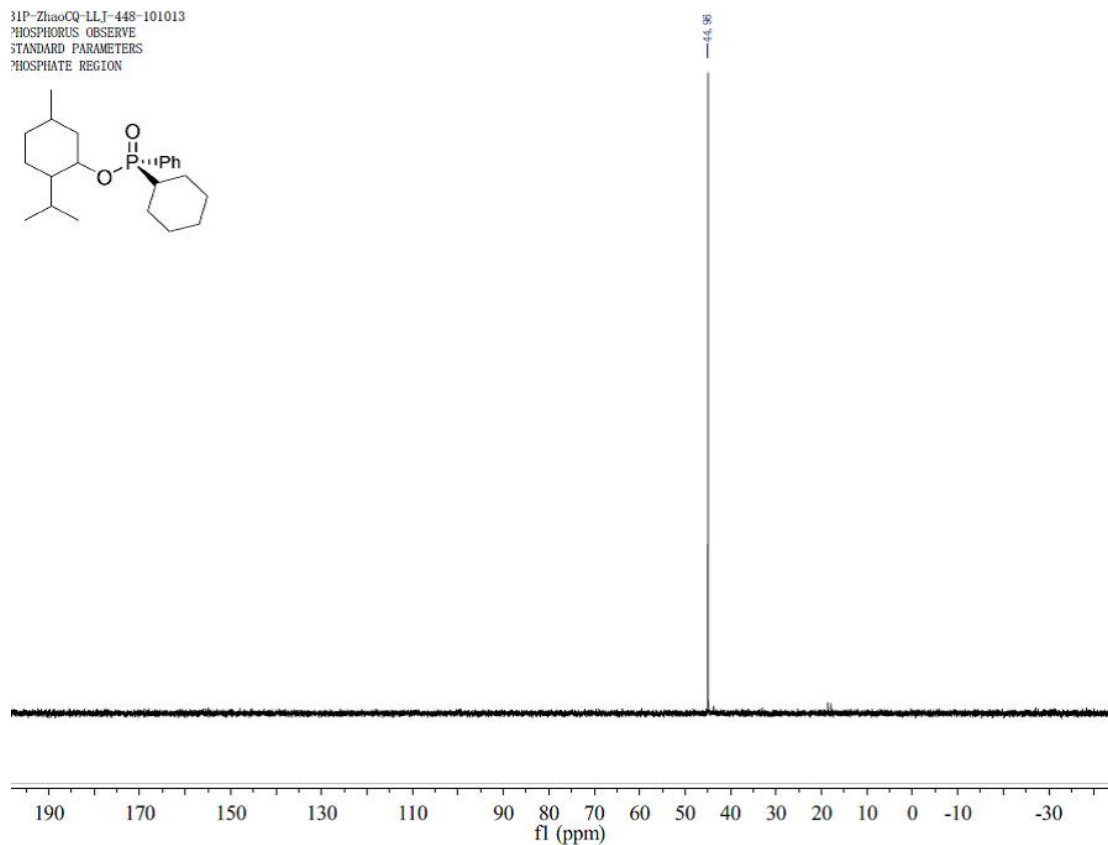

**(*S<sub>P</sub>*)-*O*-Menthyl *cyclo*-hexylphenylphosphinate (12e)**

13C-ZhaoCQ-LLJ-448-101013  
 13C OBSERVE

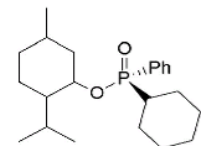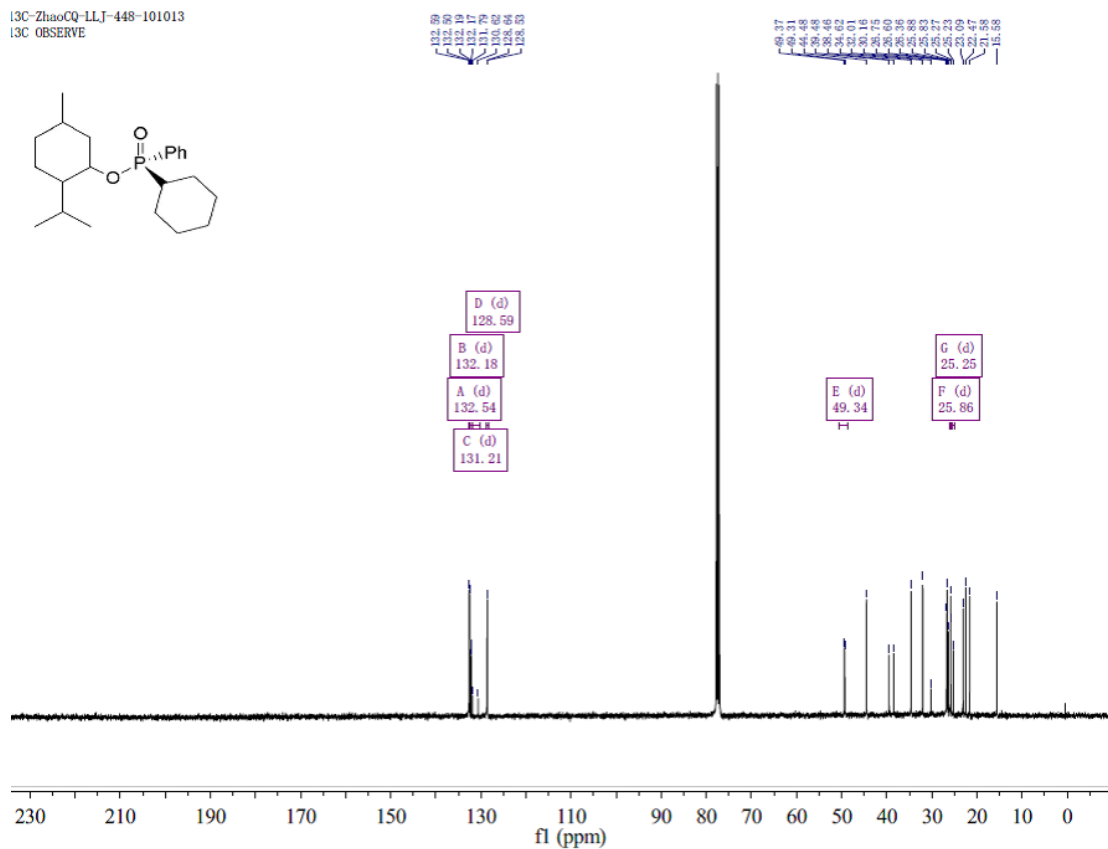

**(S<sub>P</sub>)-O-Menthyl *s*-butylphenylphosphinate (12f)**

1H-ZhaoCQ-LLJ-452-101010  
STANDARD 1H OBSERVE

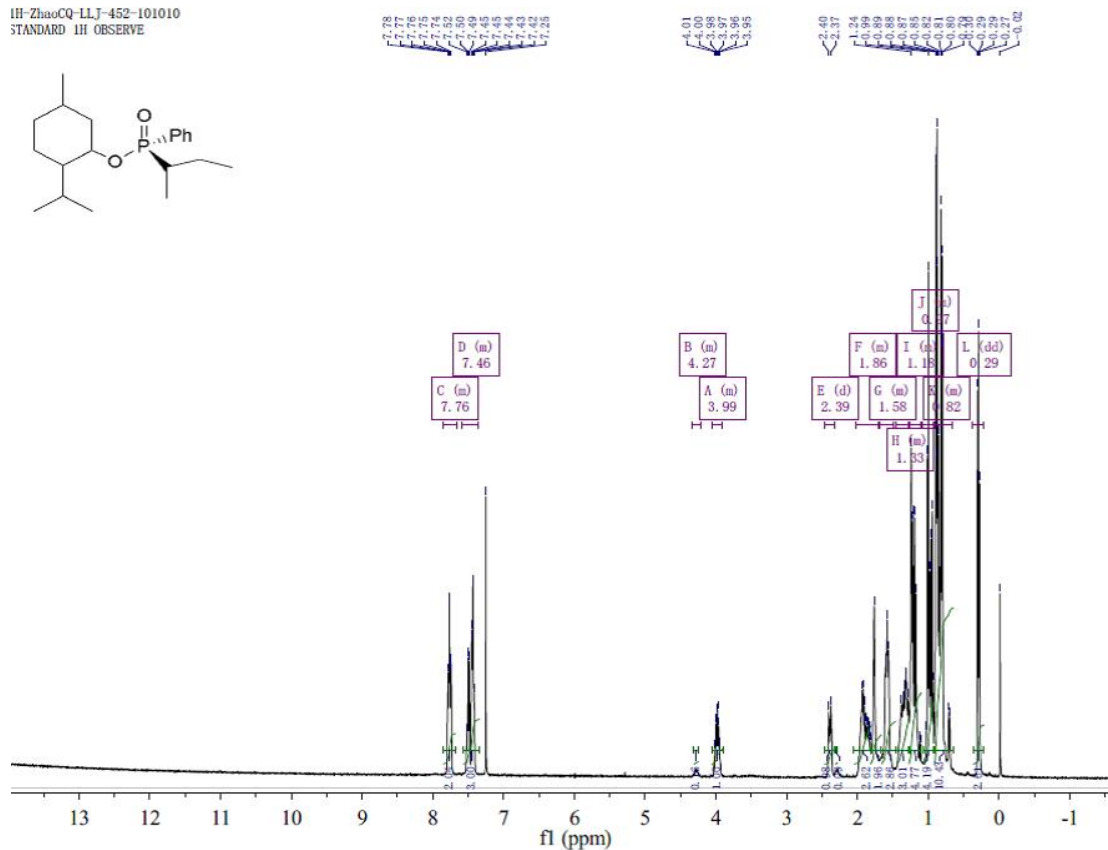

**(S<sub>P</sub>)-O-Menthyl *s*-butylphenylphosphinate (12f)**

31P-ZhaoCQ-LLJ-452-101010  
PHOSPHORUS OBSERVE  
STANDARD PARAMETERS  
PHOSPHATE REGION

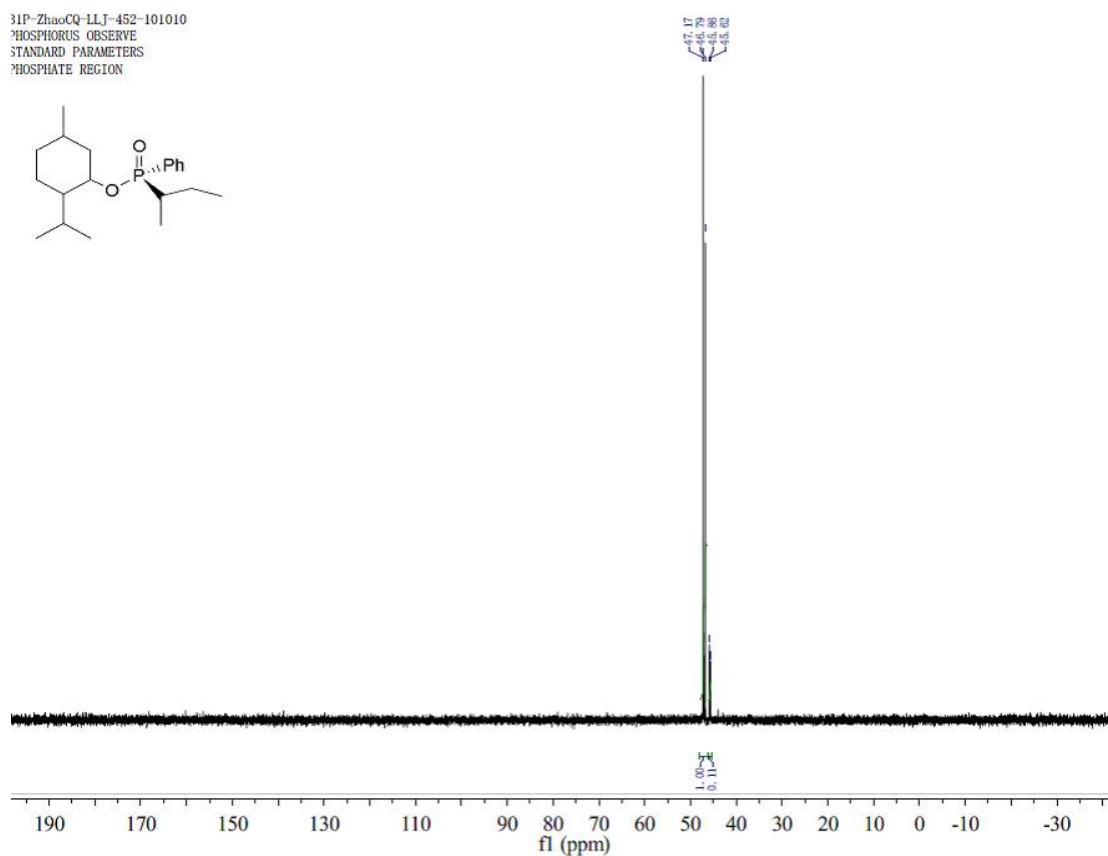

**(*S<sub>P</sub>*)-*O*-Menthyl *s*-butylphenylphosphinate (12f)**

13C-ZhaoCQ-LLJ-452-101010  
13C OBSERVE

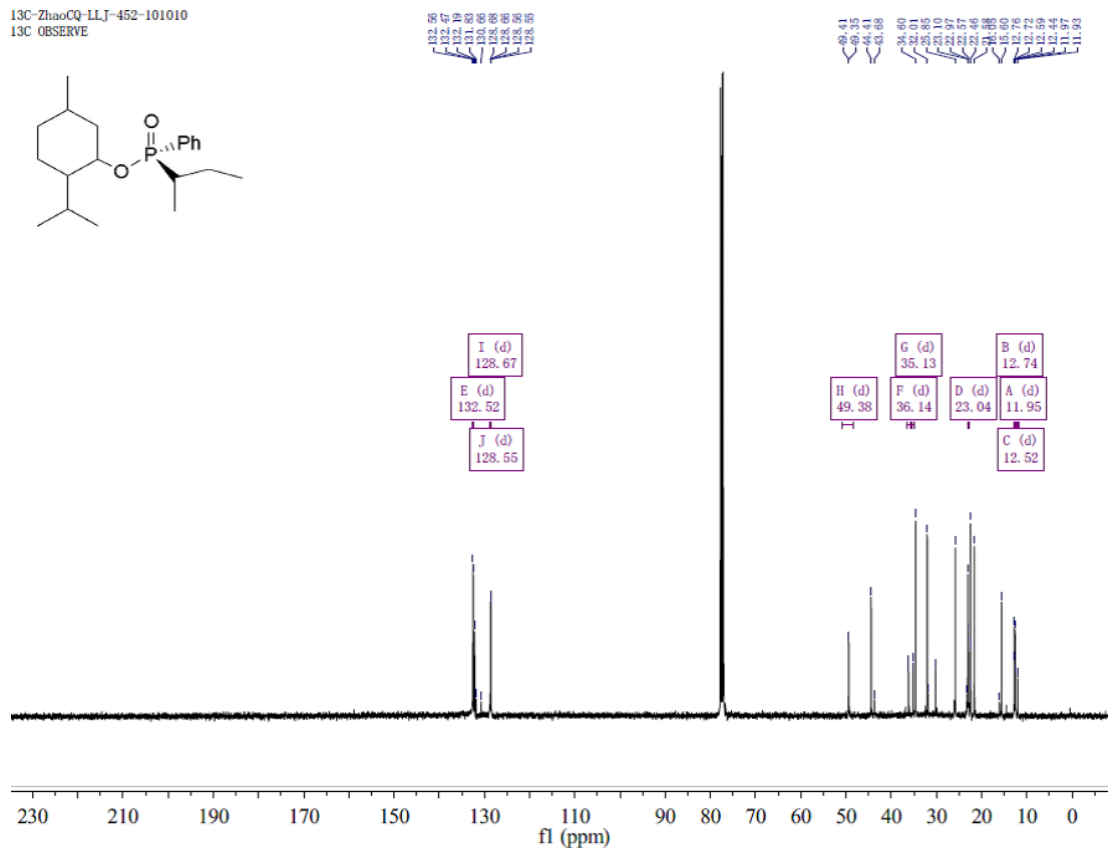

**(*S<sub>P</sub>*)-*O*-Menthyl *t*-butylphenylphosphinate (12g)**

1H-ZhaoCQ-LLJ-446-100923  
STANDARD 1H OBSERVE

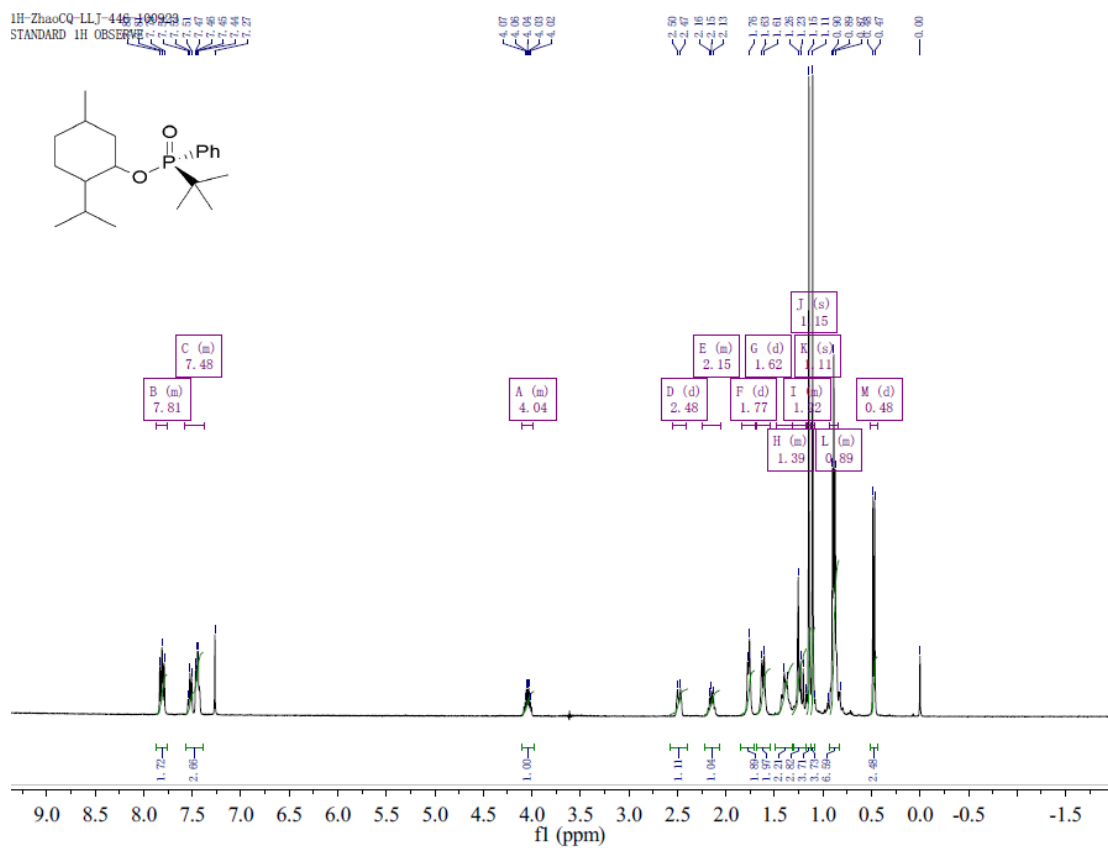

**(*S<sub>P</sub>*)-*O*-Menthyl *t*-butylphenylphosphinate (12g)**

31P-ZhaoCQ-LLJ-446-100923  
PHOSPHORUS OBSERVE  
STANDARD PARAMETERS  
PHOSPHATE REGION

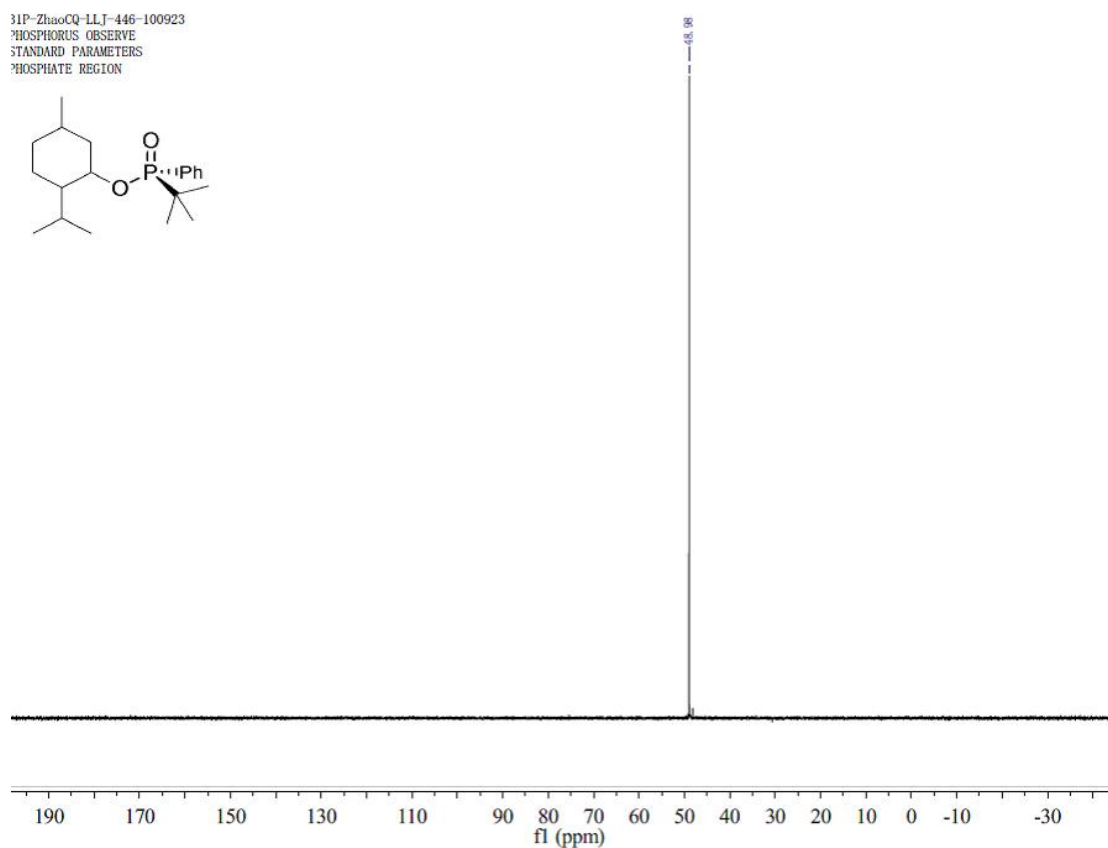

**(*S<sub>P</sub>*)-*O*-Menthyl *t*-butylphenylphosphinate (12g)**

13C-ZhaoCQ-LLJ-446-100926  
13C OBSERVE

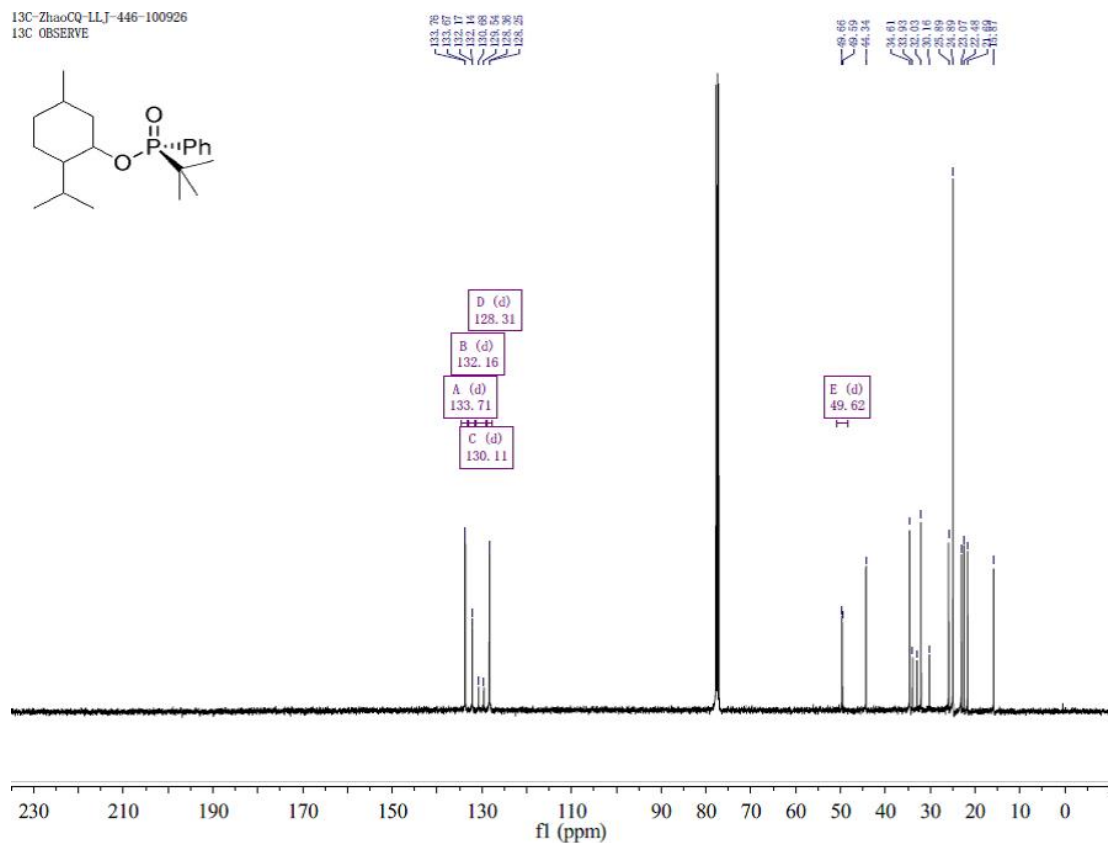

**(S<sub>P</sub>)-O-Menthyl benzylphenylphosphinate (12h)**

1H-ZhaoCQ-WWM-302-100405  
STANDARD 1H OBSERVE

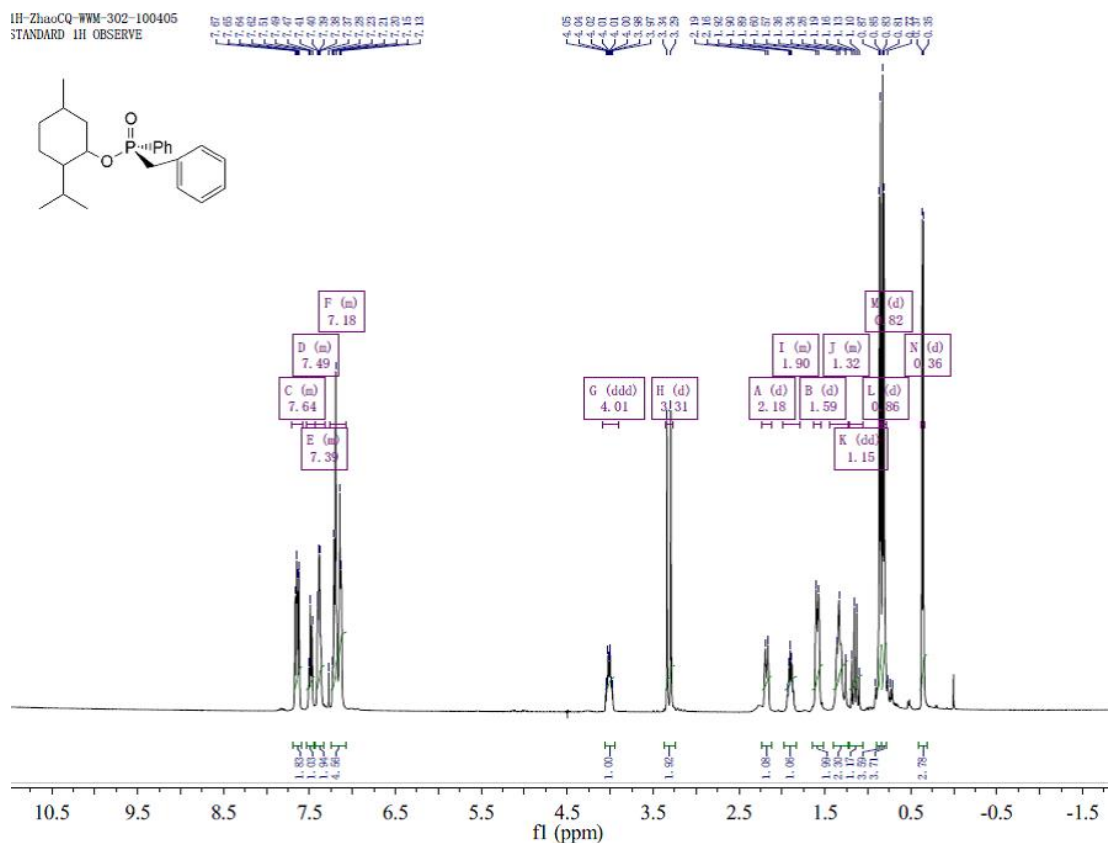

**(S<sub>P</sub>)-O-Menthyl benzylphenylphosphinate (12h)**

31P-ZhaoCQ-WWM-302-100405  
PHOSPHORUS OBSERVE  
STANDARD PARAMETERS  
PHOSPHATE REGION

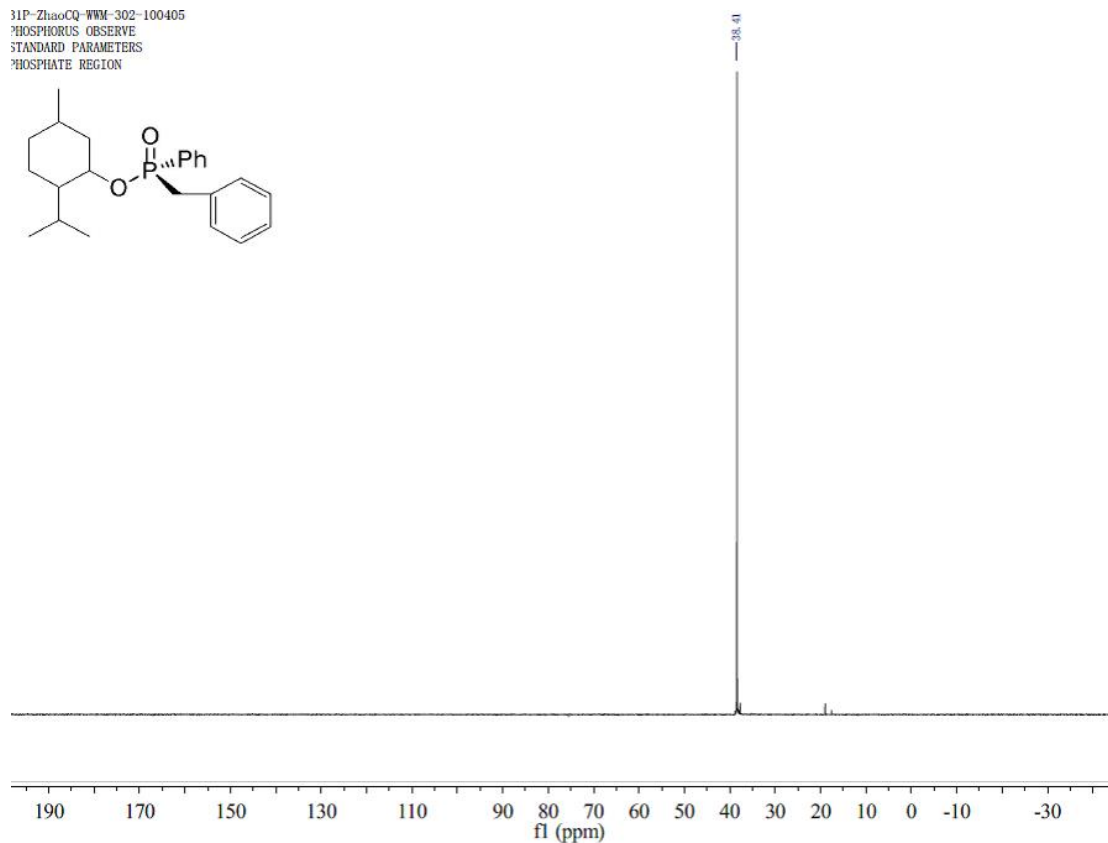

**(*S<sub>P</sub>*)-*O*-Menthyl benzylphenylphosphinate (12h)**

13C-ZhaoCQ-WM-302-100407  
13C OBSERVE

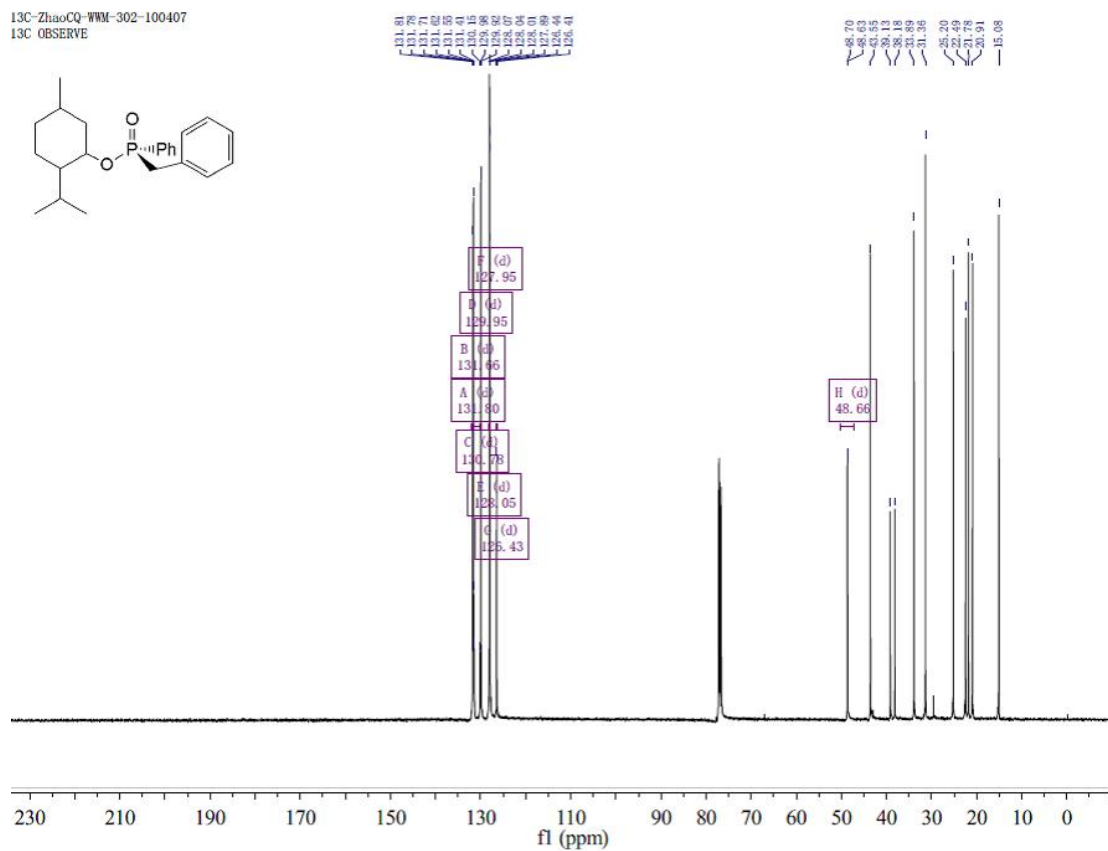

**(*S<sub>P</sub>*)-*O*-Menthyl allylphenylphosphinate (12i)**

1H-ZhaoCQ-WM-353-100611  
STANDARD 1H OBSERVE

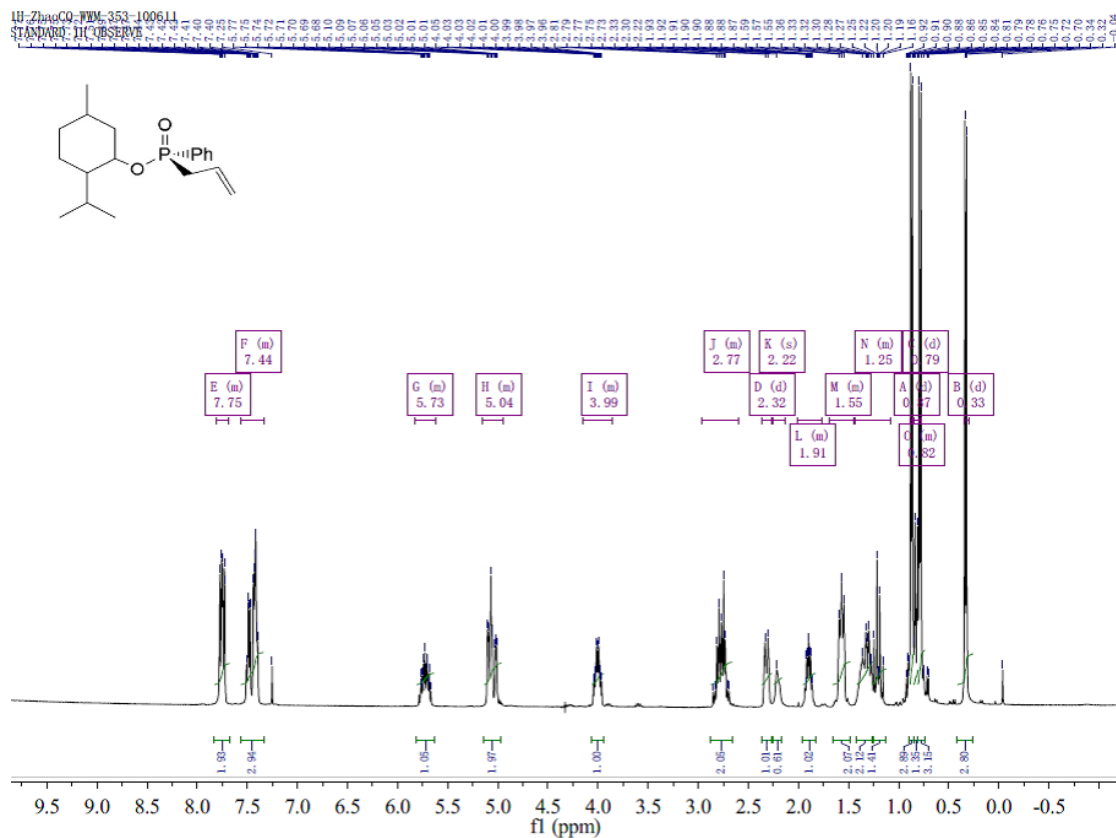

**(*S<sub>P</sub>*)-*O*-Menthyl allylphenylphosphinate (12i)**

31P-ZhaoCQ-WWM-353-100611  
PHOSPHORUS OBSERVE  
STANDARD PARAMETERS  
PHOSPHATE REGION

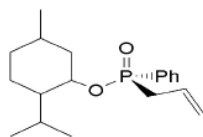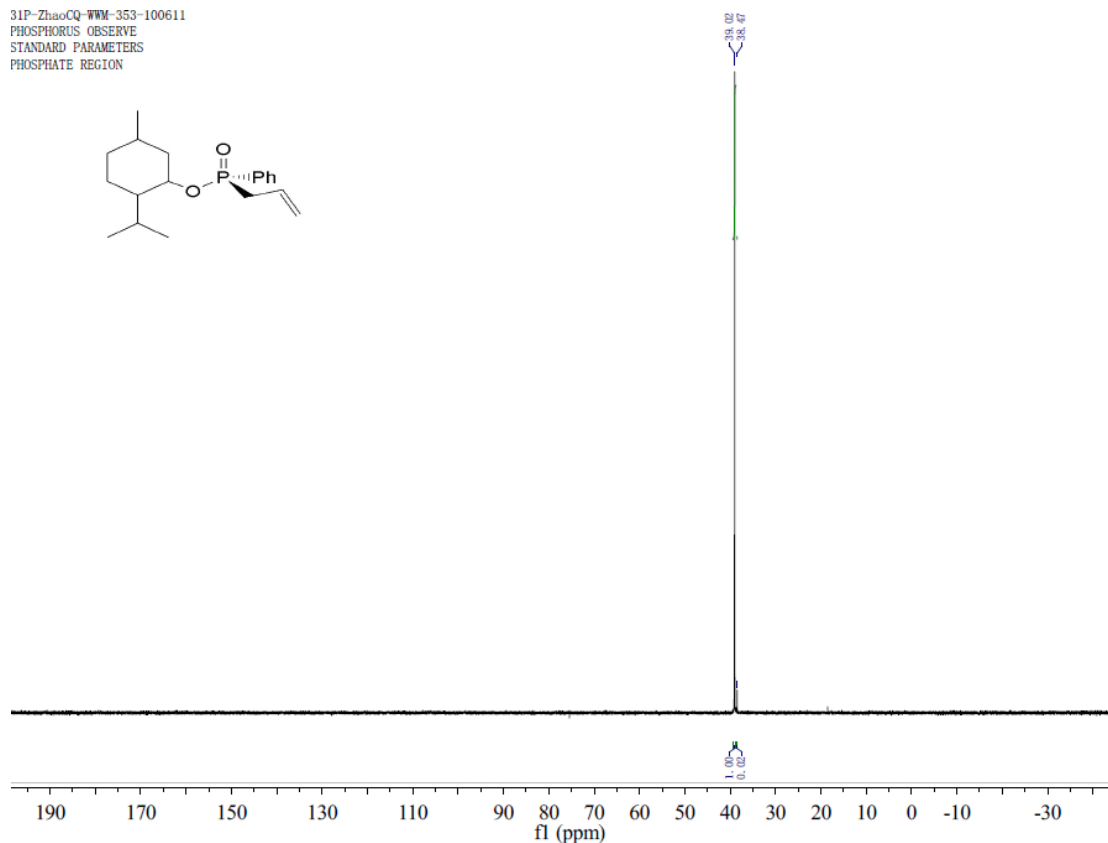

**(*S<sub>P</sub>*)-*O*-Menthyl allylphenylphosphinate (12i)**

13C-ZhaoCQ-WWM-353-100619  
13C OBSERVE

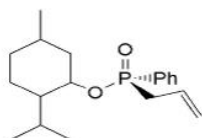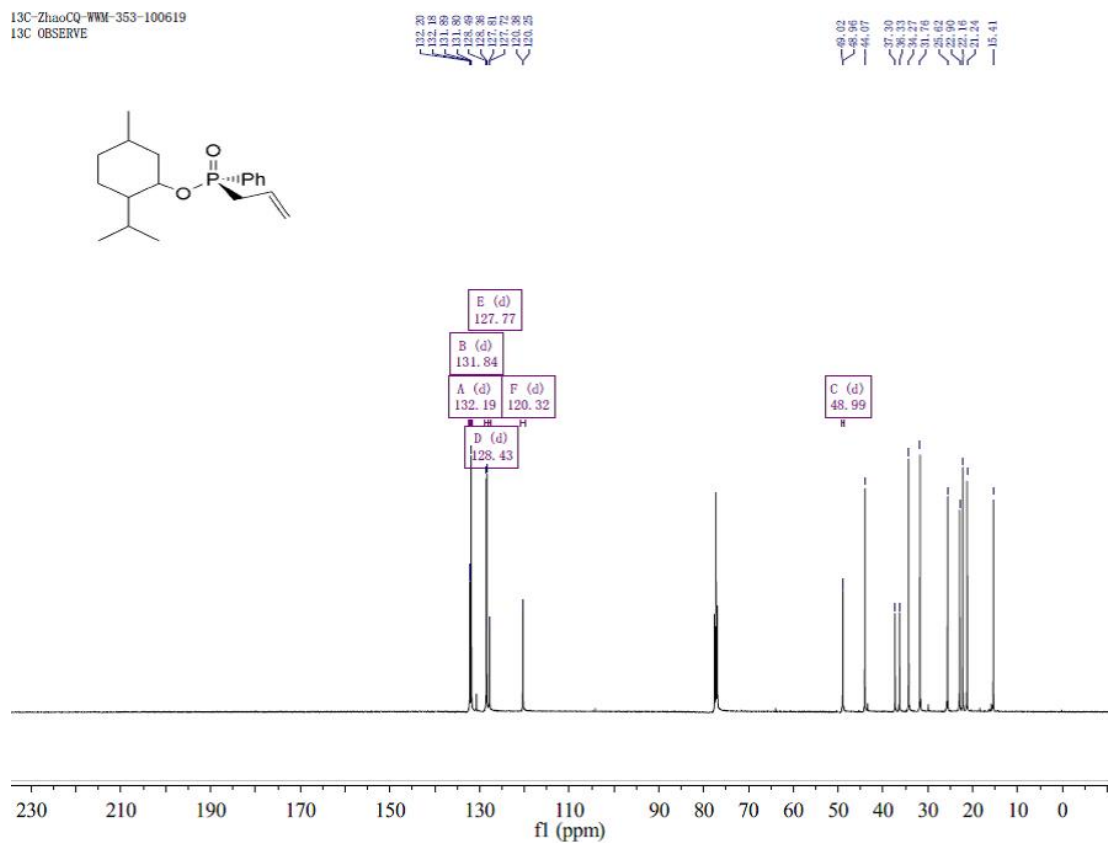



**(*R<sub>P</sub>*)-*O*-Menthyl *p*-bromophenylphenylphosphinate (12j)**

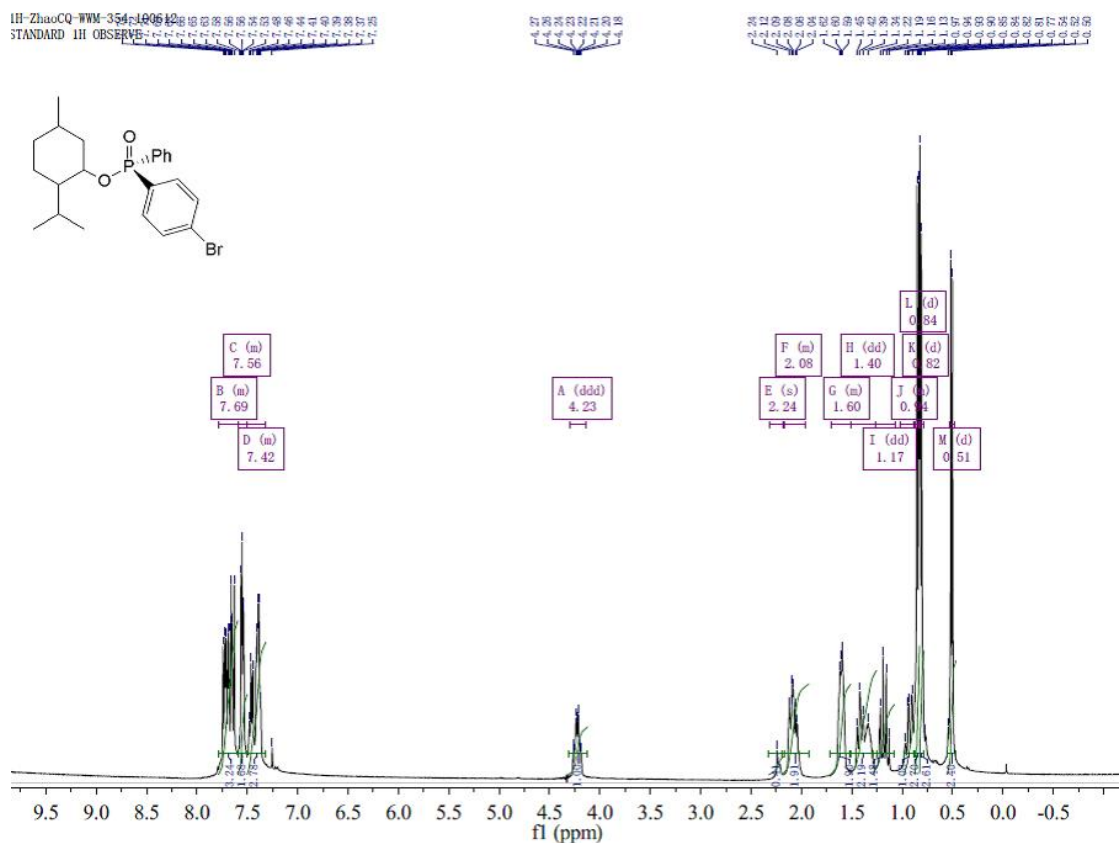

**(*R<sub>P</sub>*)-*O*-Menthyl *p*-bromophenylphenylphosphinate (12j)**

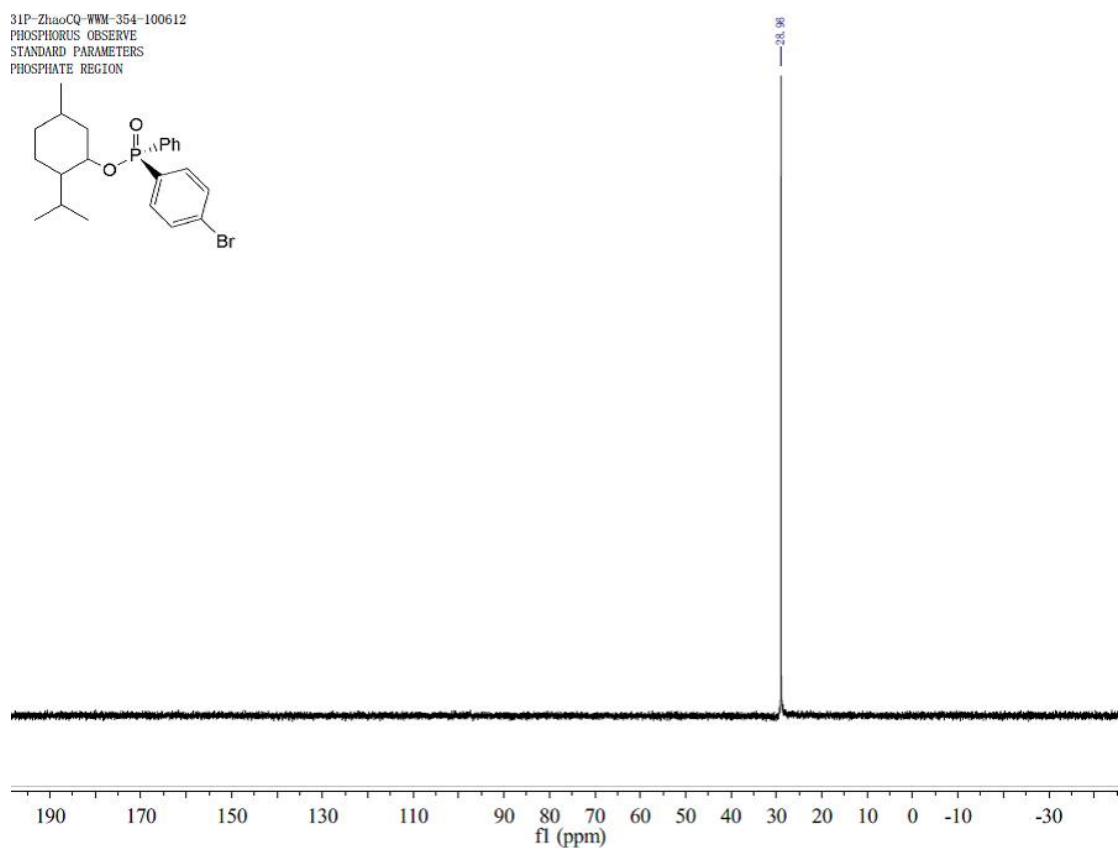

**(*R*<sub>P</sub>)-*O*-Menthyl *p*-bromophenylphenylphosphinate (12j)**

13C-ZhaoCQ-WWM-354-100618  
13C OBSERVE

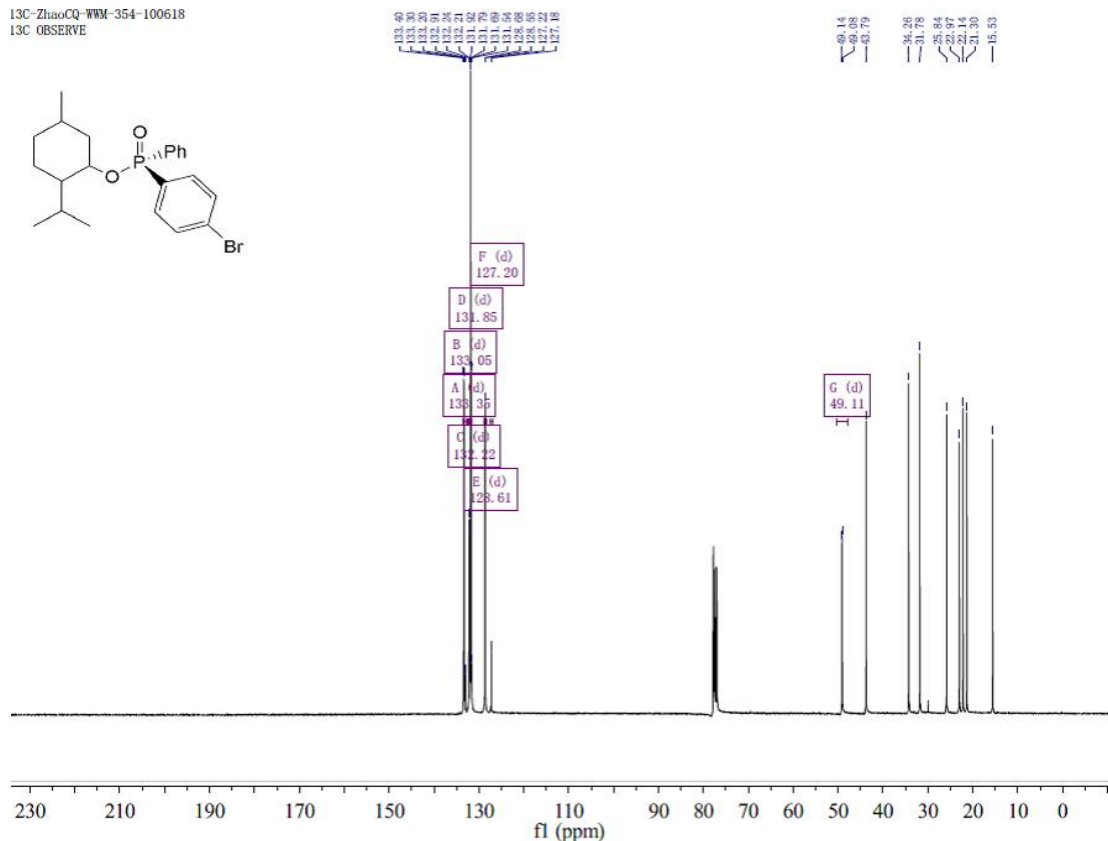

**(*R*<sub>P</sub>)-*O*-Menthyl *p*-chlorophenylphenylphosphinate (12k)**

1H-ZhaoCQ-WWM-338-100521  
STANDARD 1H OBSERVE

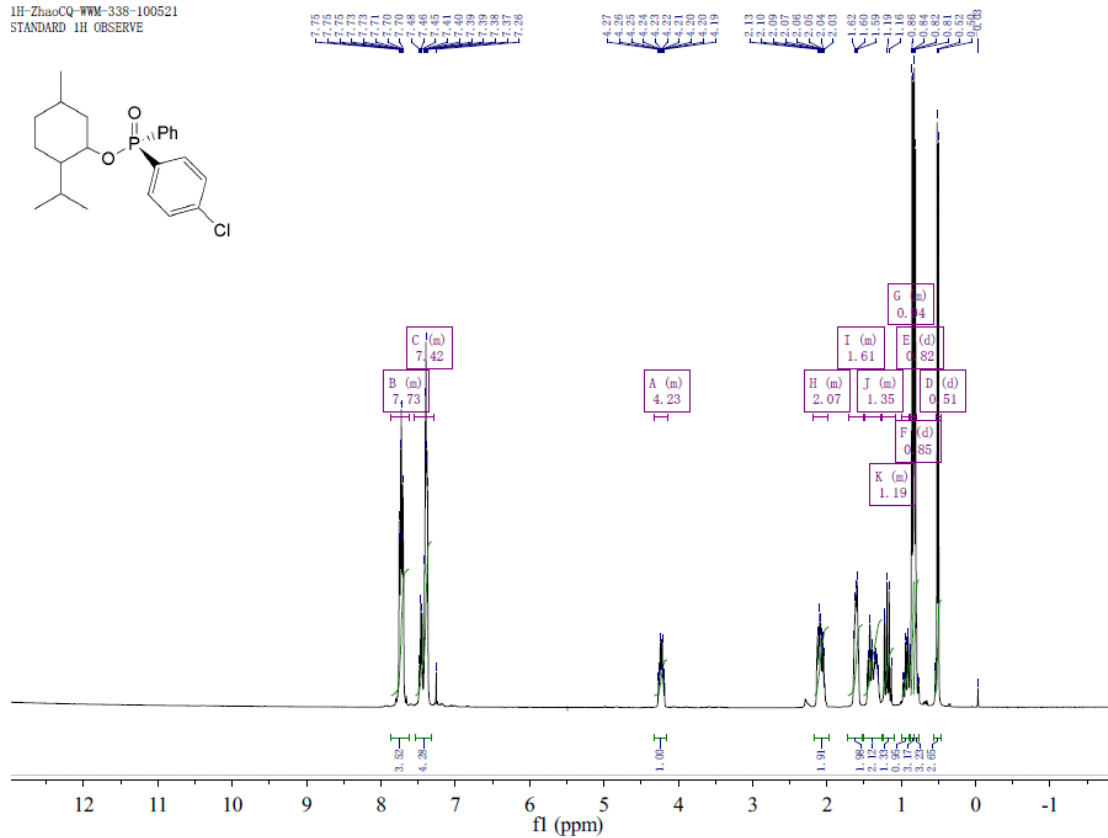

31P-ZhaoCQ-WM-338-100521  
PHOSPHORUS OBSERVE  
STANDARD PARAMETERS  
PHOSPHATE REGION

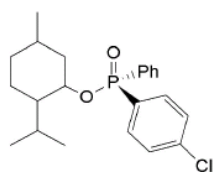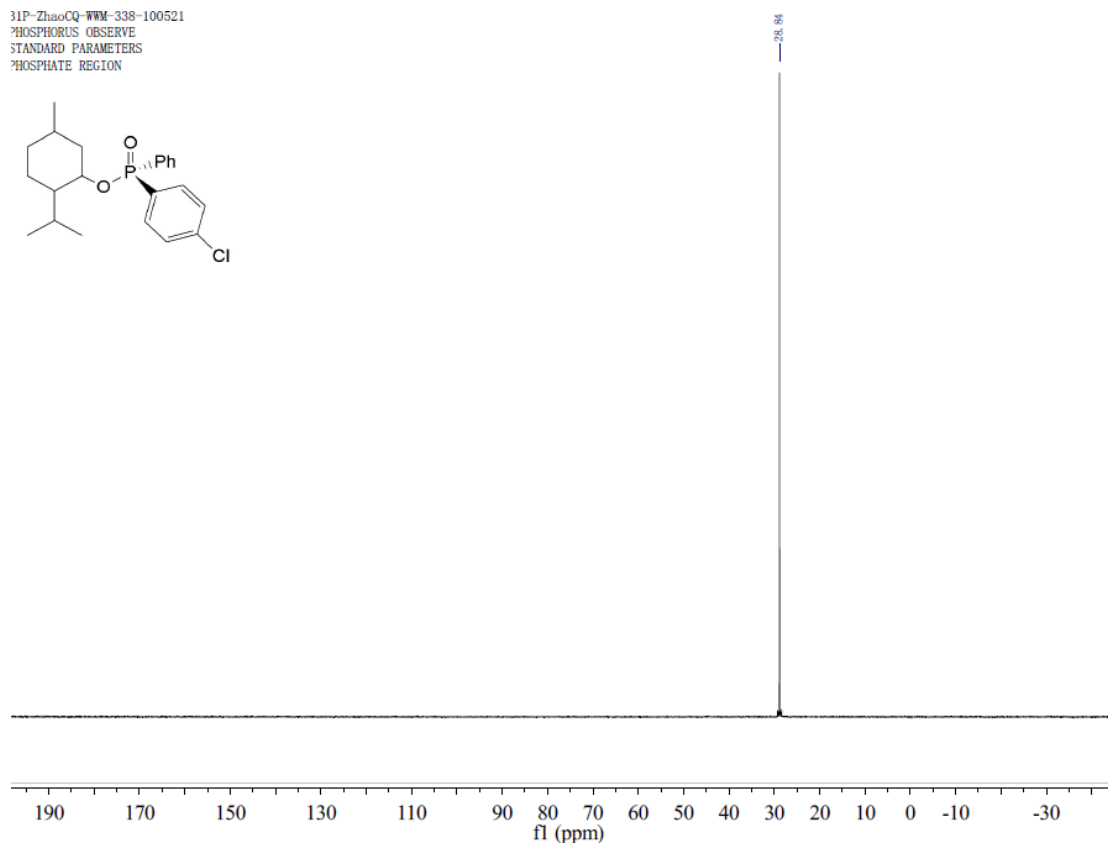

13C-ZhaoCQ-WWM-338-100524  
13C OBSERVE

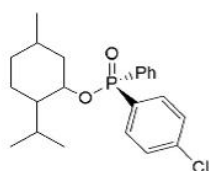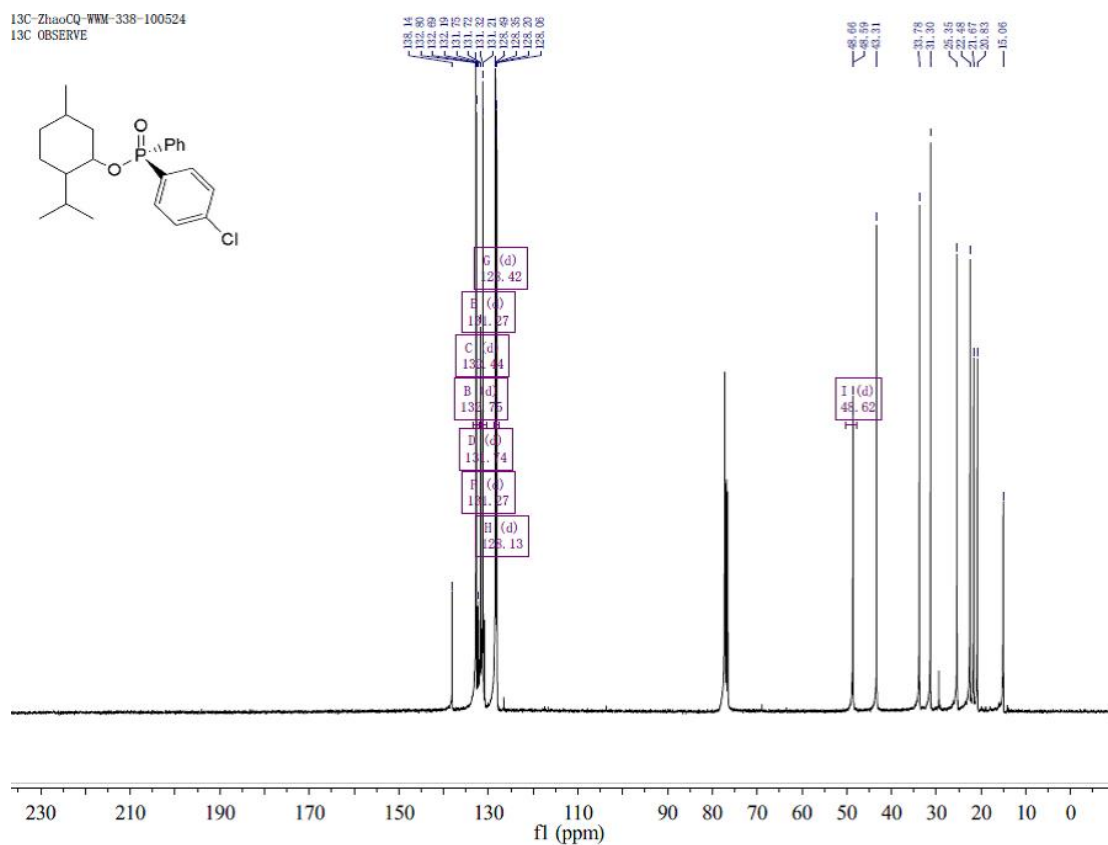

**(*R<sub>P</sub>*)-*O*-Menthyl *o*-methylphenylphenylphosphinate (12l)**

1H-ZhaoCQ-WM-358-100619  
STANDARD 1H OBSERVE

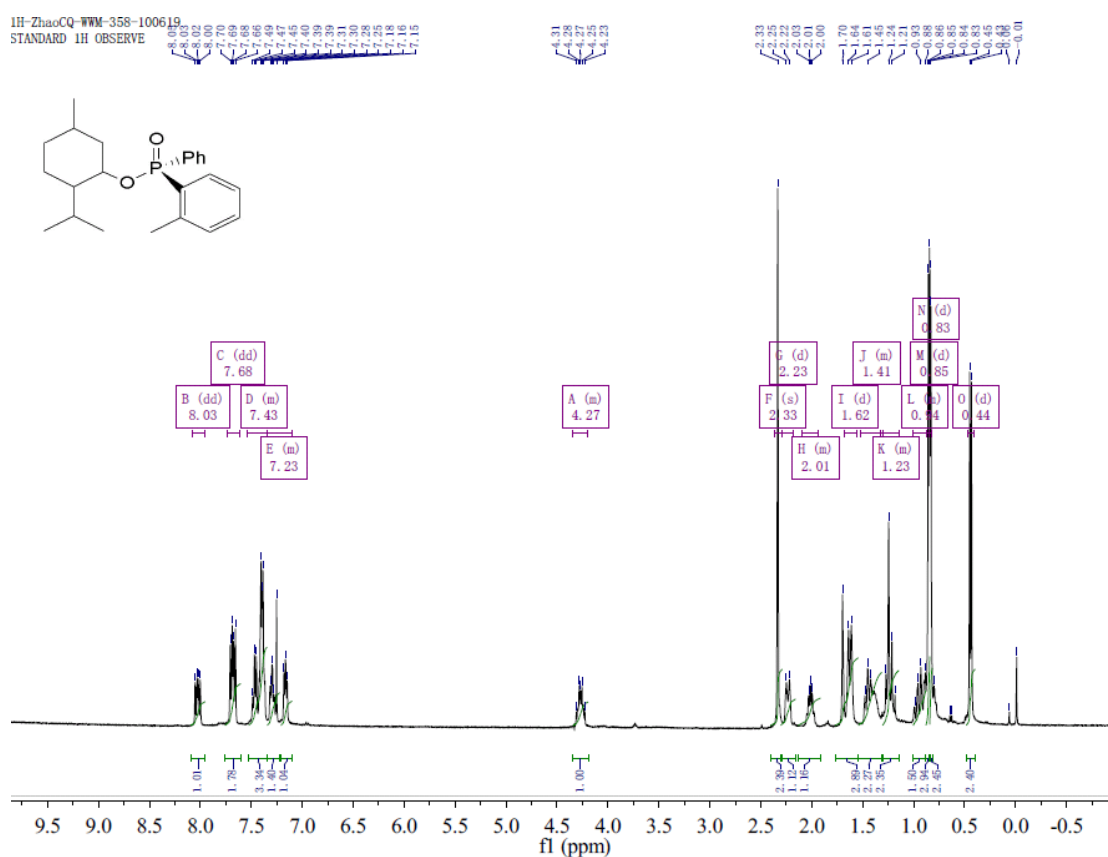

**(*R<sub>P</sub>*)-*O*-Menthyl *o*-methylphenylphenylphosphinate (12l)**

31P-ZhaoCQ-WM-355-100617  
PHOSPHORUS OBSERVE  
STANDARD PARAMETERS  
PHOSPHATE REGION

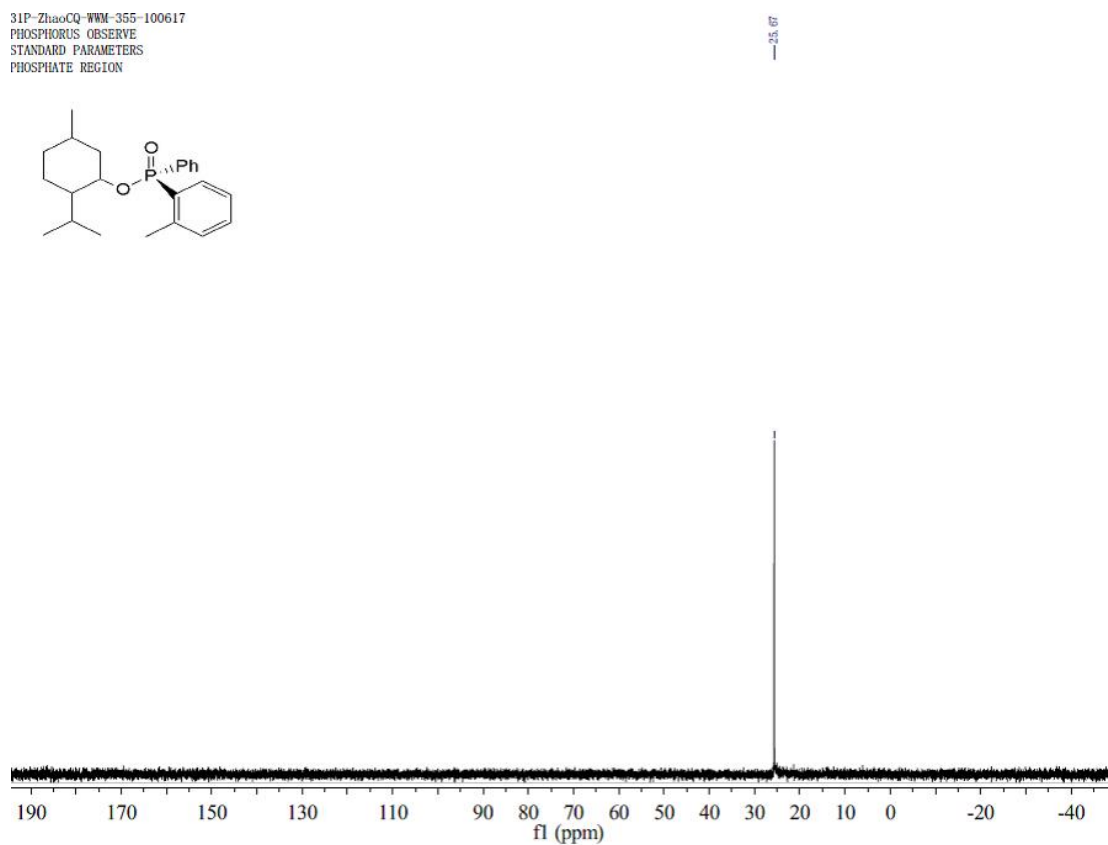

13C-ZhaoCQ-WWM-358-100621  
13C OBSERVE

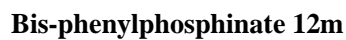1H-ZhaoCQ-LLJ-384-1-100711  
STANDARD 1H OBSERVE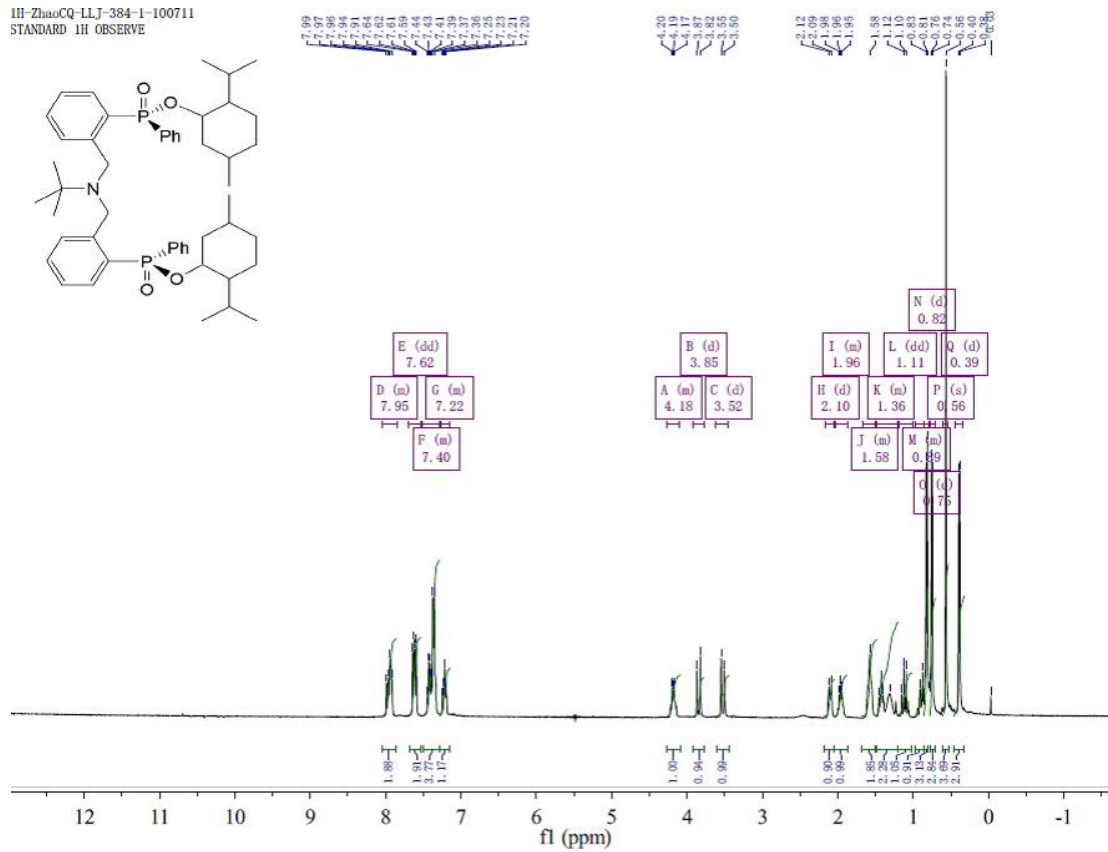

## Bis-phenylphosphinate 12m

31P-ZhaoCQ-LLJ-384-1-100710  
PHOSPHORUS OBSERVE  
STANDARD PARAMETERS  
PHOSPHATE REGION

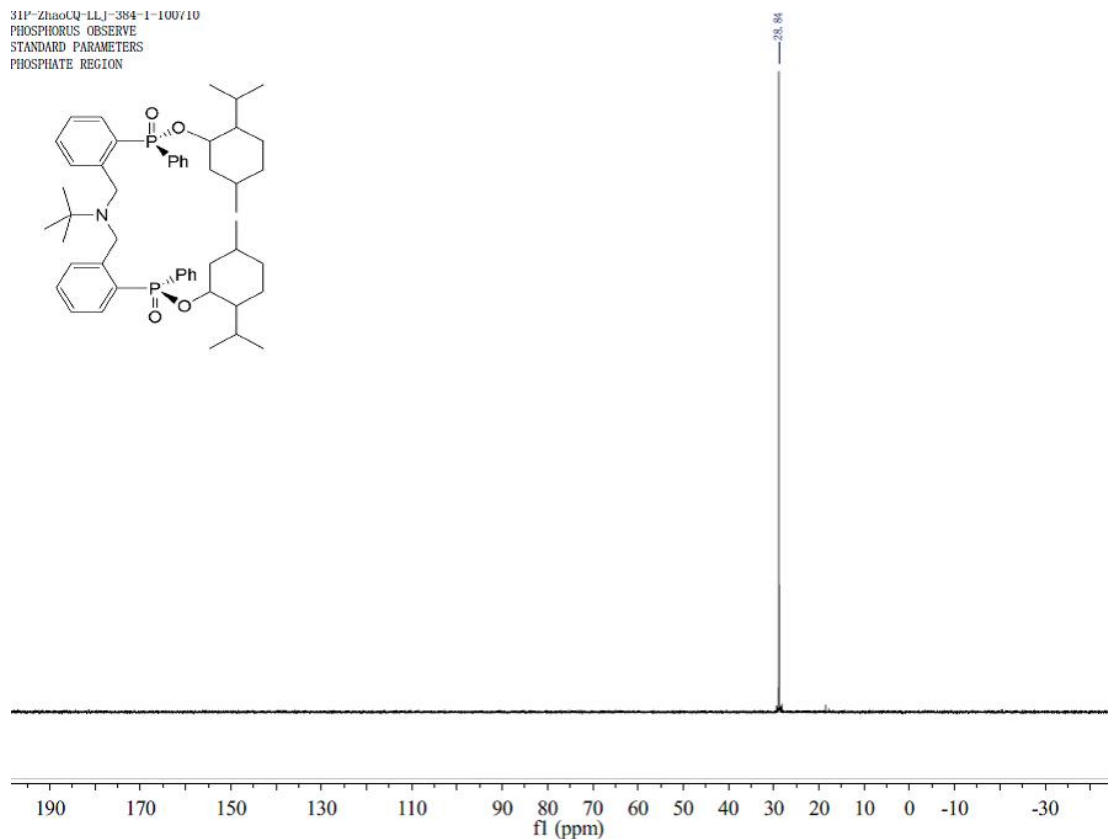

## Bis-phenylphosphinate 12m

13C-ZhaoCQ-LLJ-384-100611  
13C OBSERVE

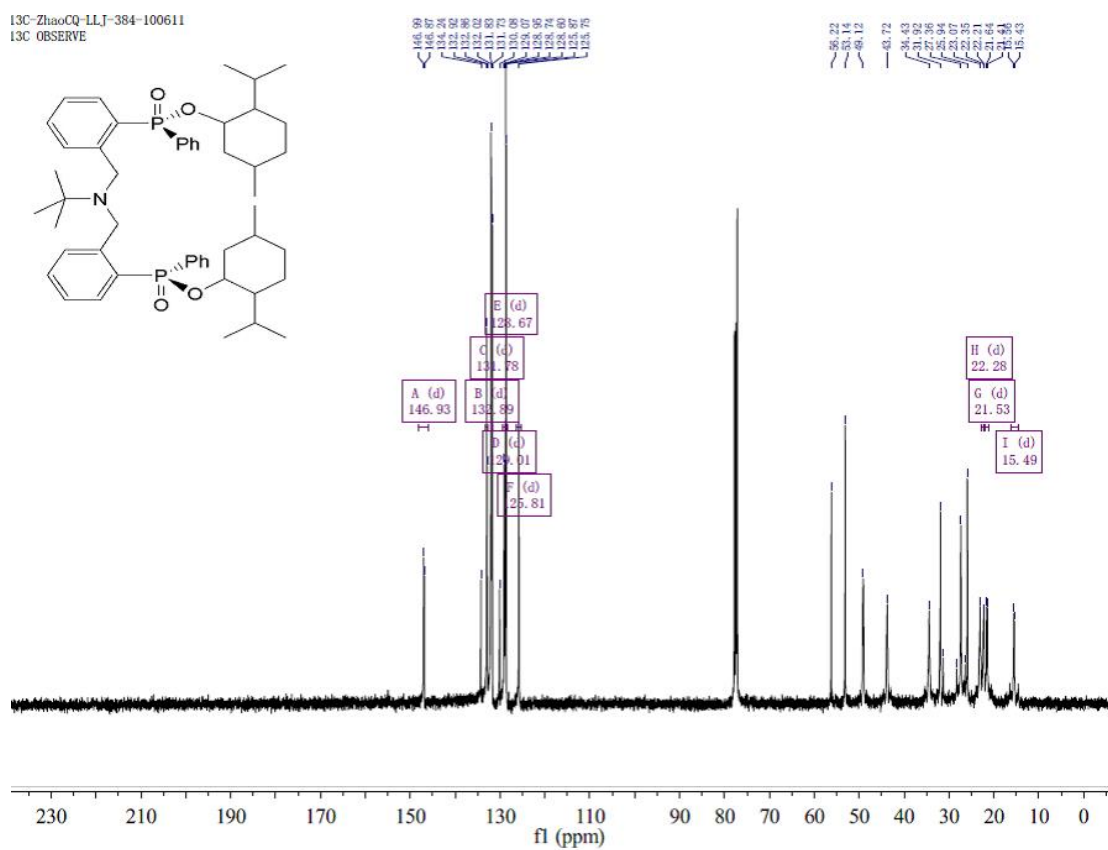

# **(*R*<sub>P</sub>)-*O*-Menthyl methylphenylphosphinate (12a')**

1H-ZhaoCQ-WMM-145-090706  
STANDARD 1H OBSERVE

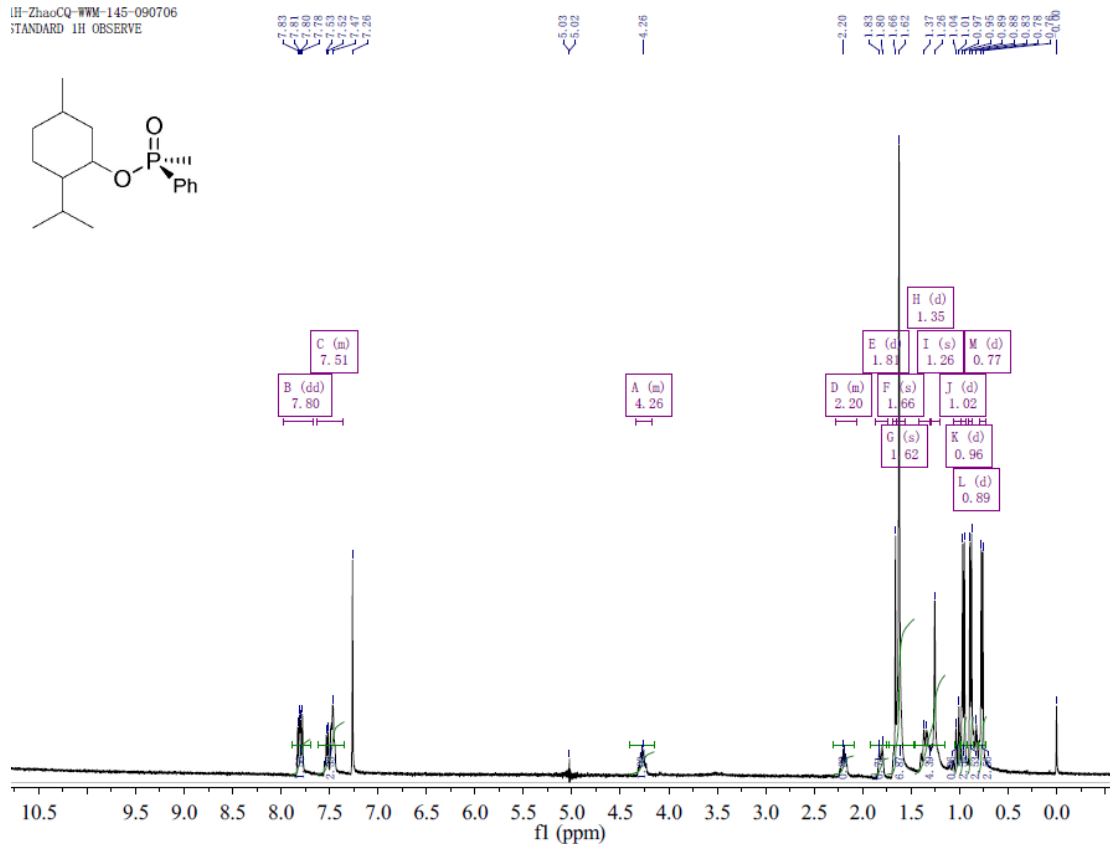

# **(*R*<sub>P</sub>)-*O*-Menthyl methylphenylphosphinate (12a')**

31P-ZhaoCQ-WMM-145-090706  
PHOSPHORUS OBSERVE  
STANDARD PARAMETERS  
PHOSPHATE REGION

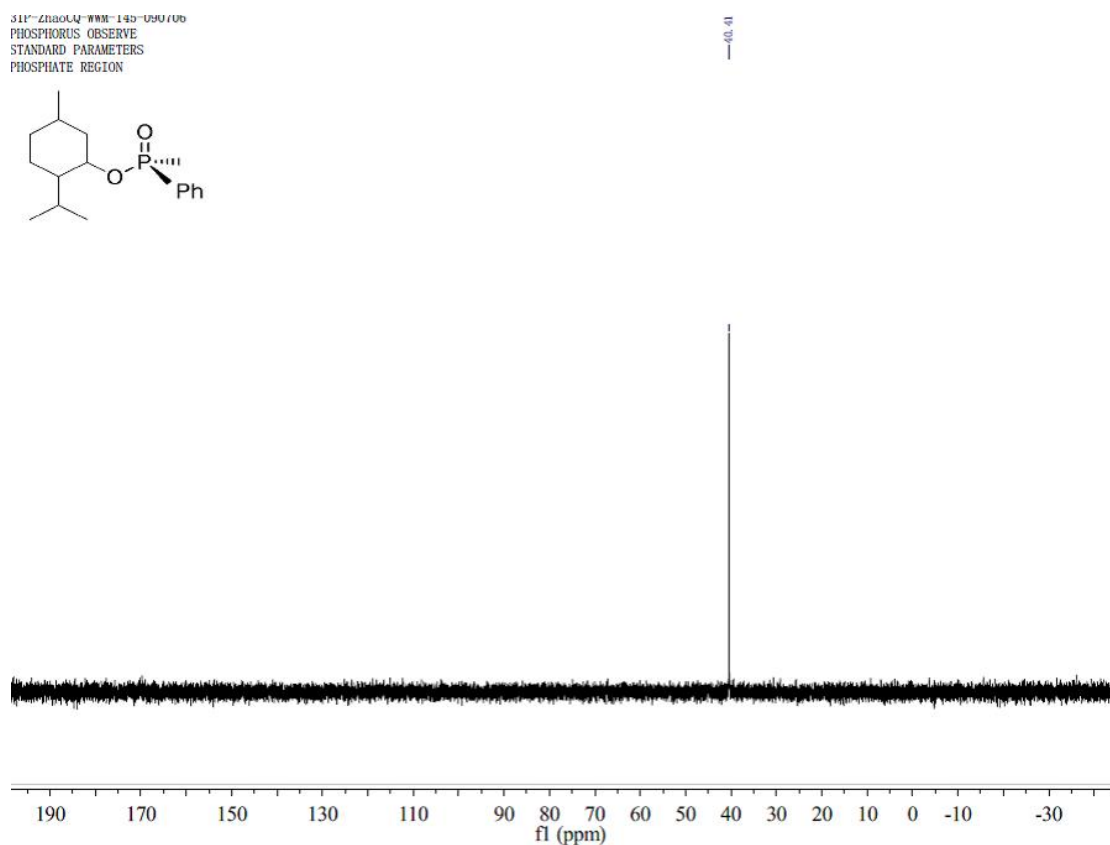

**(*R*<sub>P</sub>)-*O*-Menthyl methylphenylphosphinate (12a')**

3C-ZhaoCQ-WM-145-090706  
3C OBSERVE

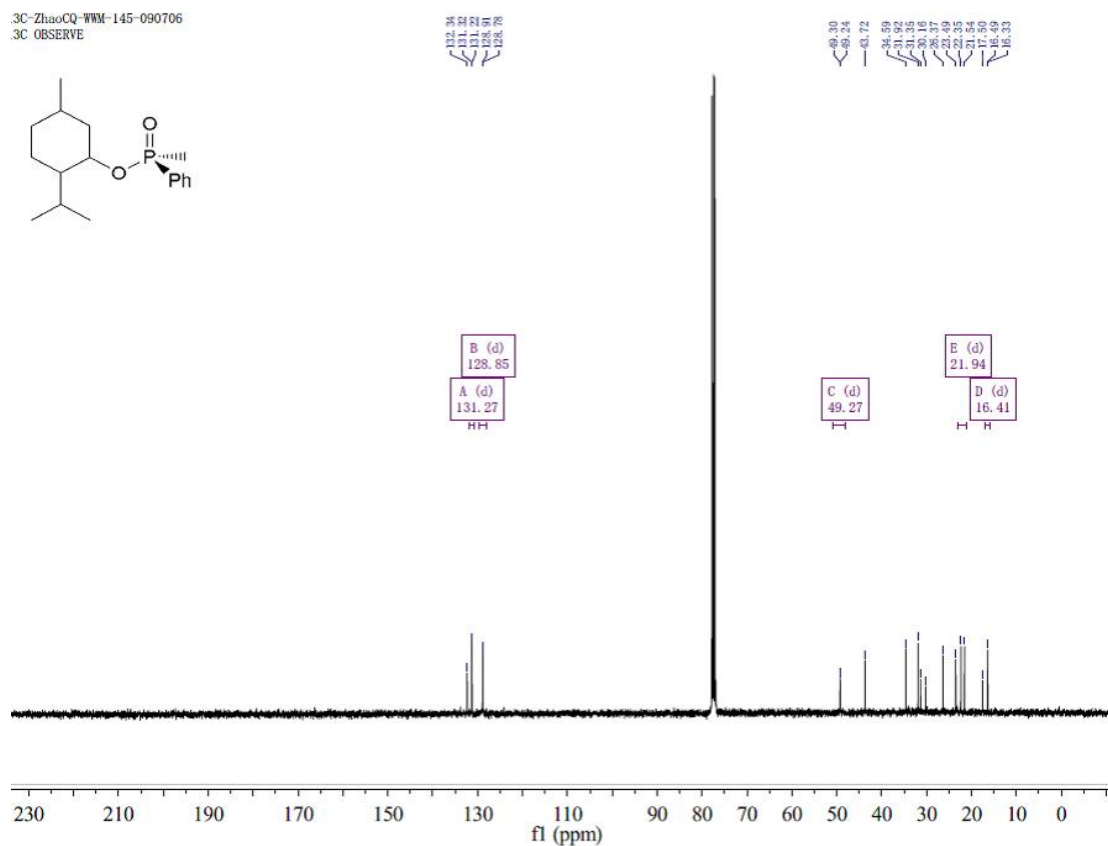

**(*R*<sub>P</sub>)-*O*-Menthyl ethylphenylphosphinate (12b')**

1H-ZhaoCQ-WM-86-090507  
STANDARD 1H OBSERVE

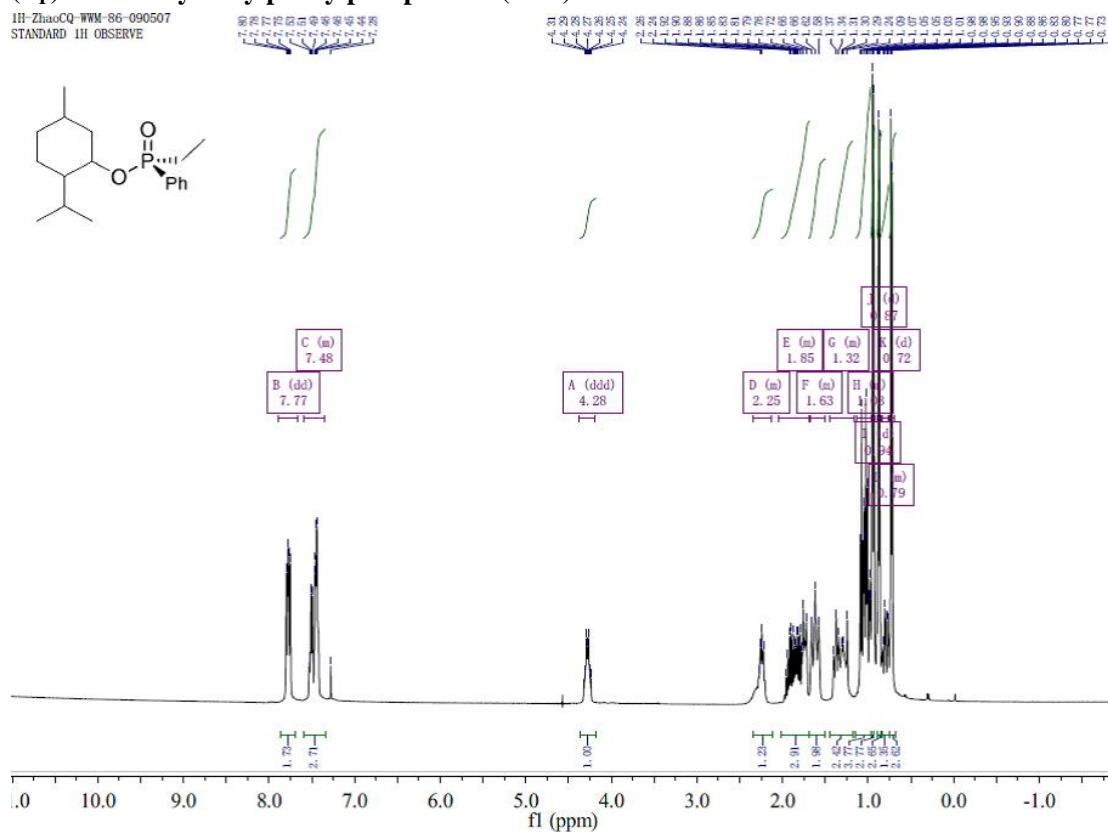



**(*R*<sub>P</sub>)-*O*-Menthyl ethylphenylphosphinate (12b')**

31P-ZhaoCQ-WMM-86-090507  
 PHOSPHORUS OBSERVE  
 STANDARD PARAMETERS  
 PHOSPHATE REGION

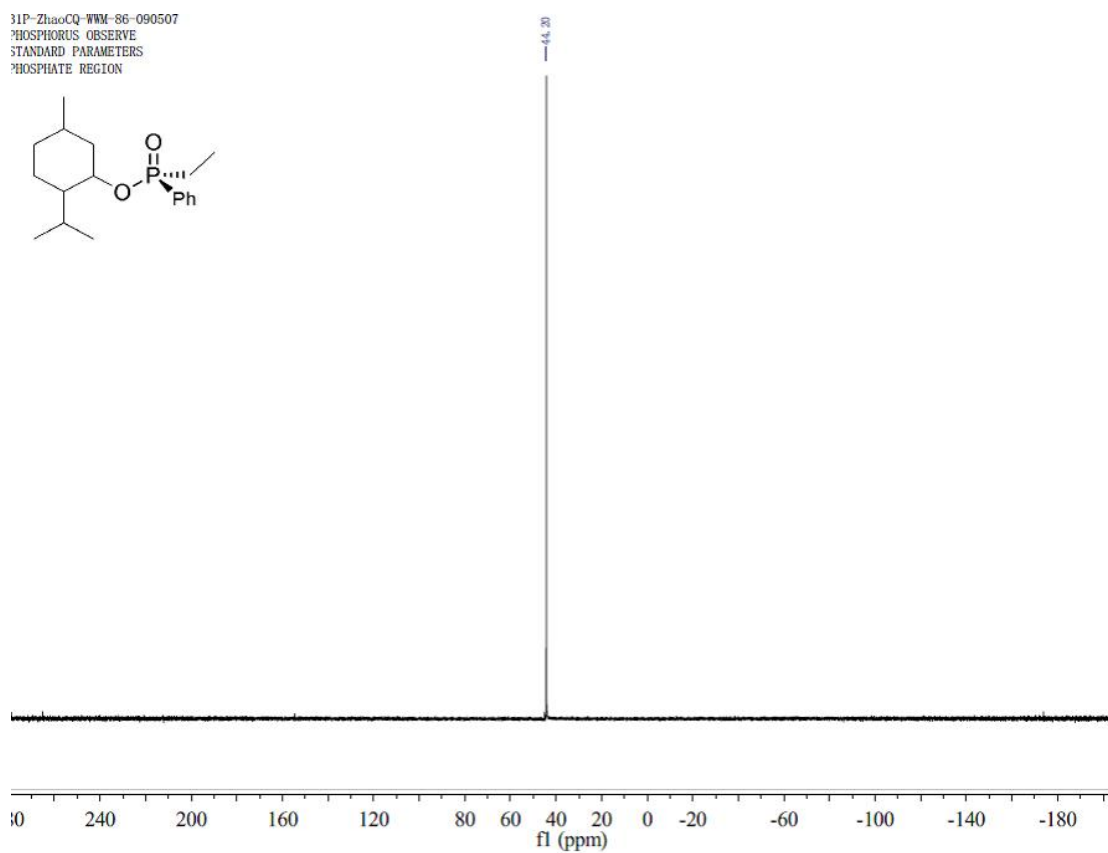

**(*R*<sub>P</sub>)-*O*-Menthyl ethylphenylphosphinate (12b')**

13C-ZhaoCQ-WMM-86-090507  
 13C OBSERVE

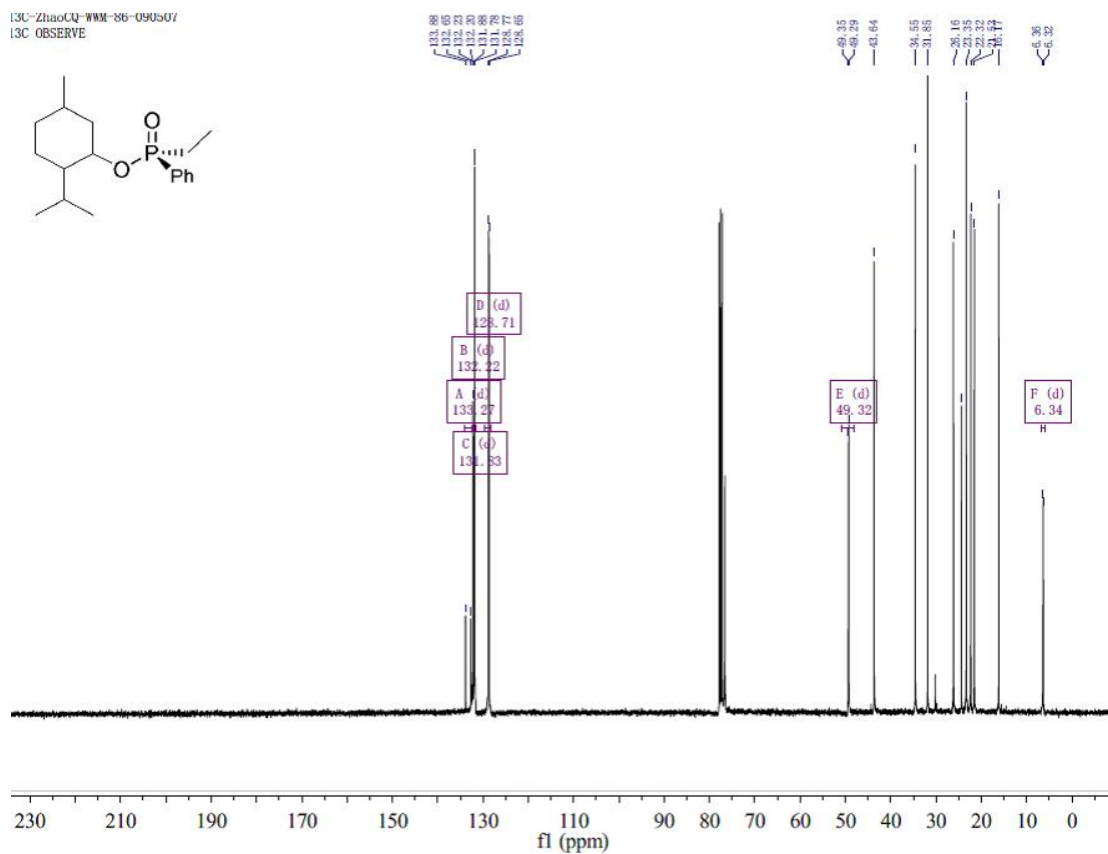

**(*R*<sub>P</sub>)-*O*-Menthyl *n*-butylphenylphosphinate (12c')**

1H-ZhaoCQ-WM-91-090508  
STANDARD 1H OBSERVE

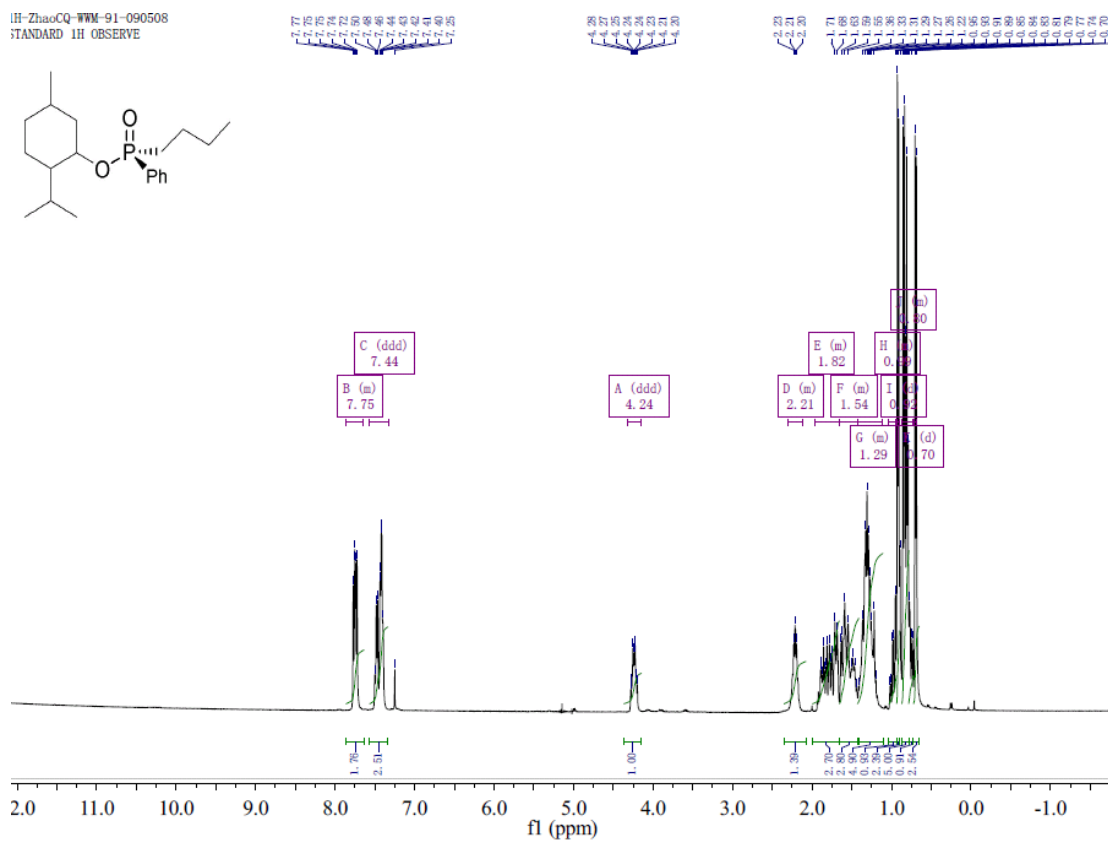

**(*R*<sub>P</sub>)-*O*-Menthyl *n*-butylphenylphosphinate (12c')**

1P-ZhaoCQ-WM-91-090508  
PHOSPHORUS OBSERVE  
STANDARD PARAMETERS  
PHOSPHATE REGION

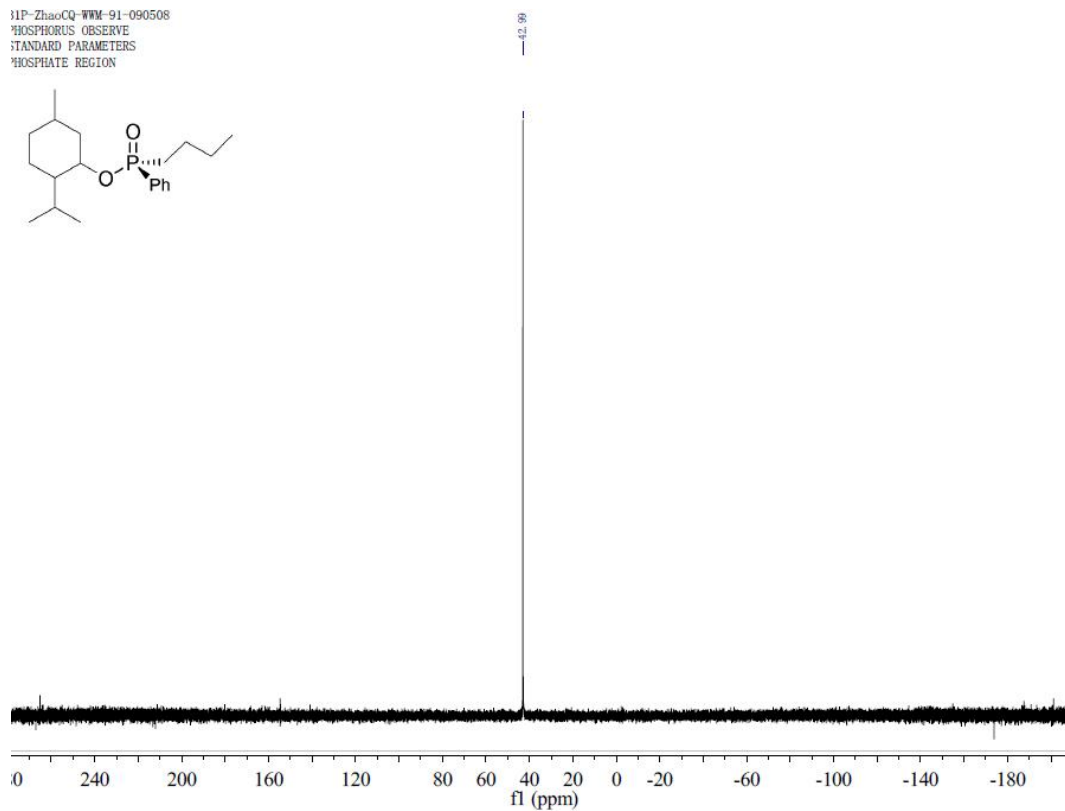





(R<sub>P</sub>)-O-Menthyl *s*-butylphenylphosphinate (12f')

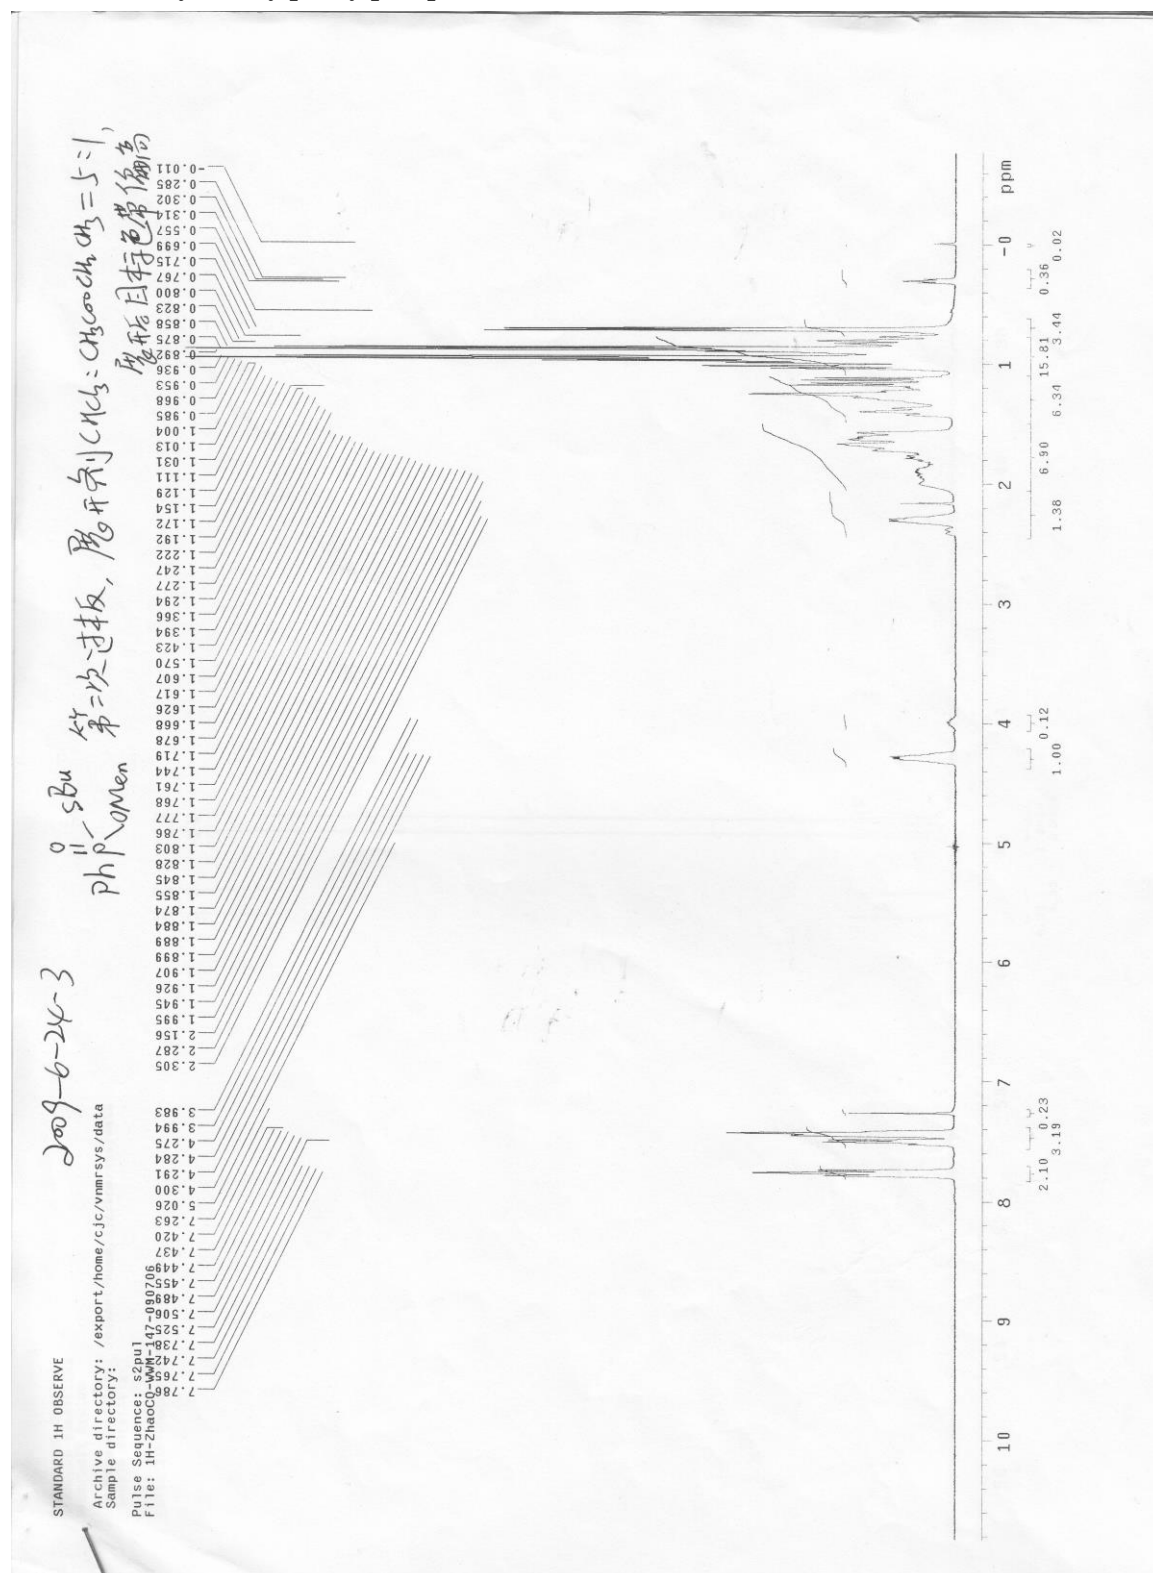

**(*R*<sub>P</sub>)-*O*-Menthyl *s*-butylphenylphosphinate (12f')**

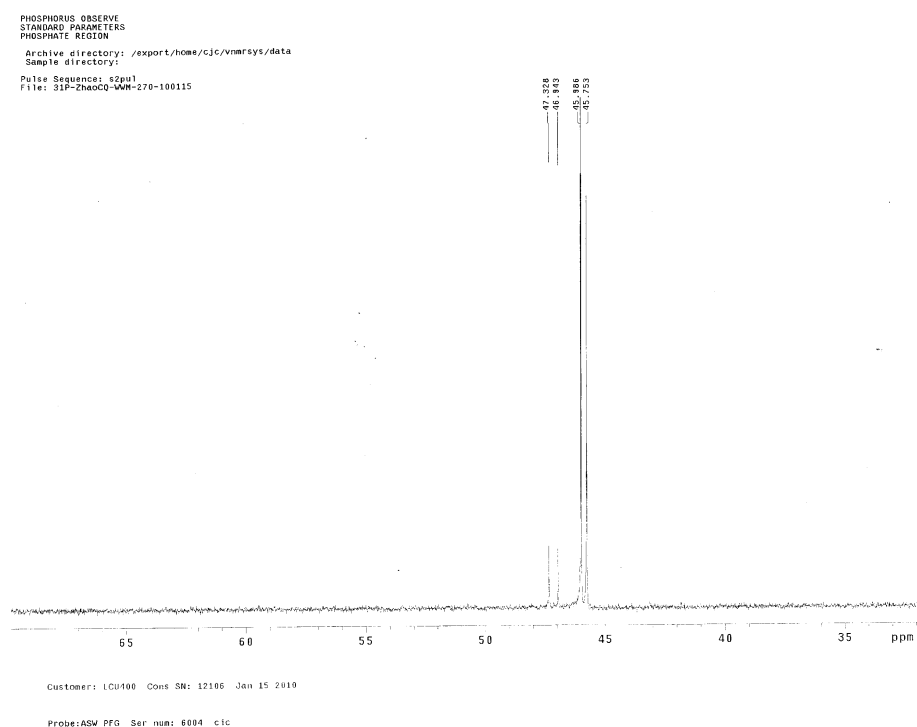

**(*R*<sub>P</sub>)-*O*-Menthyl *s*-butylphenylphosphinate (12f')**

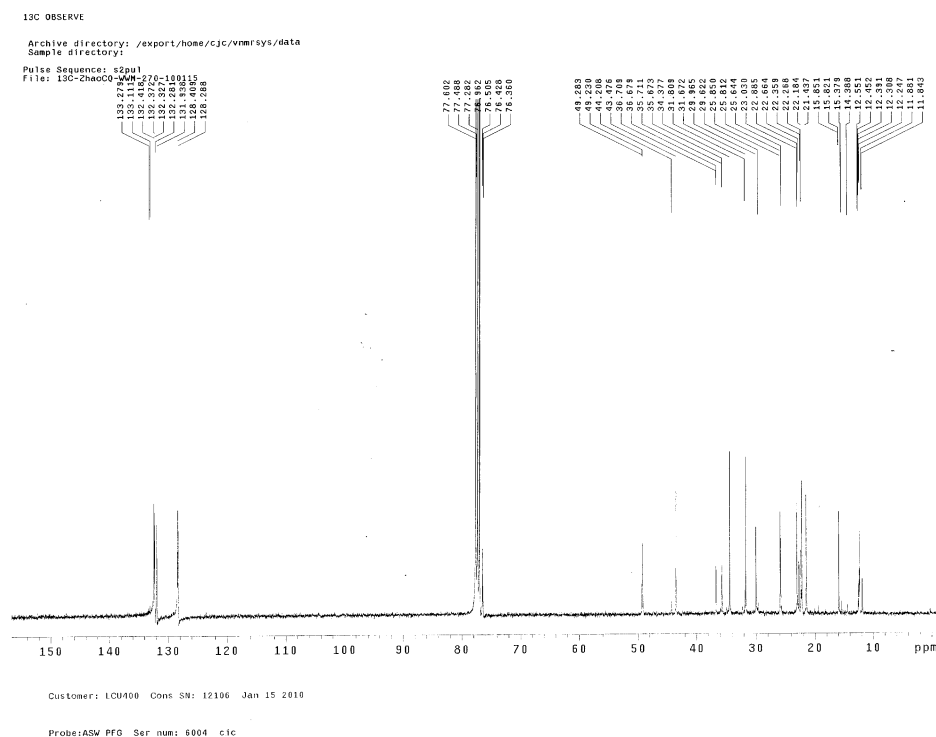

[illegible]

# **(S<sub>P</sub>)-O-Menthyl *t*-butylphenylphosphinate (12g')**

PHOSPHORUS OBSERVE  
STANDARD PARAMETERS  
PHOSPHATE REGION  
Archive directory: /export/home/cjc/vmrsys/data  
Sample directory:  
File: PHOSPHORUS  
Pulse Sequence: s2pu1

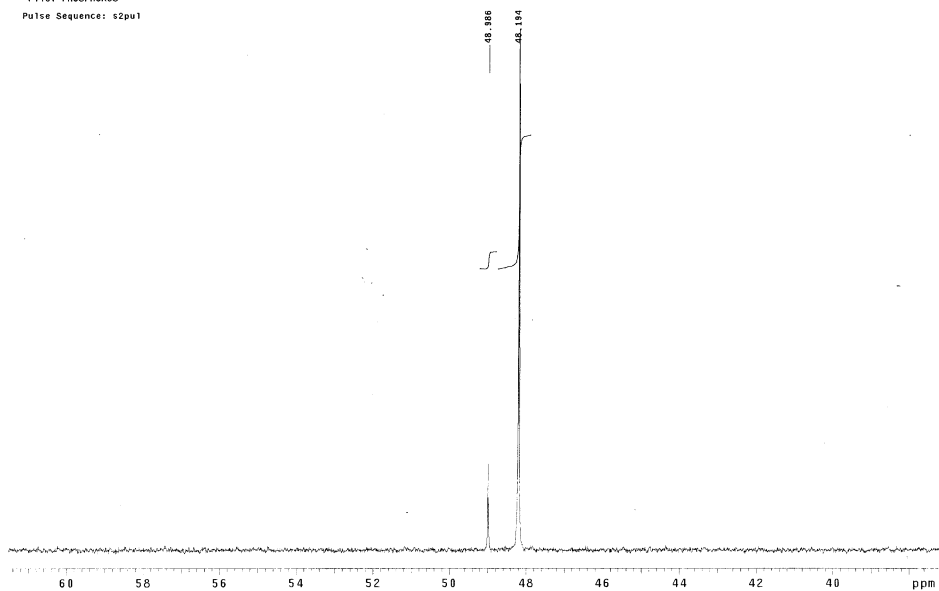

Customer: LCU400 Cons SN: 12106 Jul 7 2009

Probe:ASW PFG Ser num: 6004 c1c

# **(S<sub>P</sub>)-O-Menthyl *t*-butylphenylphosphinate (12g')**

13C OBSERVE

Archive directory: /export/home/cjc/vmrsys/data  
Sample directory:

Pulse Sequence: s2pu1  
File: 13C-2HUSO-WM-273-108121

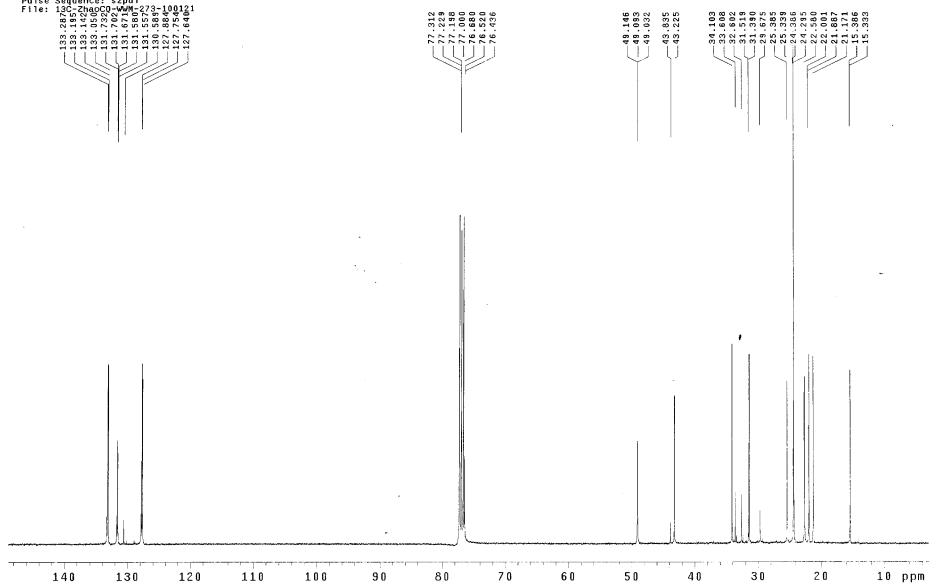



2008-7-15-2

STANDARD 1H OBSERVE

Archive directory: /export/home/cjc/vnmrsys/data  
Sample directory:

Pulse Sequence: szpul  
File: 1h-20080715-168-030306

Ph<sup>0</sup>CH<sub>2</sub>Ph  
PhP<sub>2</sub>OMe

二次重结晶, H.P. 基本干净

7.677  
7.666  
7.648  
7.631  
7.509  
7.490  
7.472  
7.408  
7.389  
7.380  
7.371  
7.367  
7.265  
7.226  
7.204  
7.185  
7.172  
7.156  
7.126  
7.109  
7.325  
7.314  
7.305  
7.297  
7.279  
7.267  
7.260  
7.251  
7.240  
7.301  
7.285  
7.255  
7.246  
7.219  
7.205  
7.168  
7.011  
2.004  
1.993  
1.976  
1.969  
1.958  
1.941  
1.934  
1.826  
1.740  
1.709  
1.643  
1.635  
1.627  
1.604  
1.586  
1.571  
1.378  
1.371  
1.363  
1.340  
1.321  
1.314  
1.305  
1.283  
1.275  
1.261  
1.246  
1.037  
1.018  
0.997  
0.986  
0.967  
0.953  
0.946  
0.939  
0.921  
0.909  
0.871  
0.853  
0.834  
0.824  
0.799  
0.770  
0.761  
0.739  
0.721  
0.003

12 11 10 9 8 7 6 5 4 3 2 1 -1 -0

ppm

1.82, 2.184  
0.38, 2.294

1.00

2.08

0.39, 2.15  
4.61, 0.05  
8.06



**(*R*<sub>P</sub>)-*O*-Menthyl allylphenylphosphinate (12i')**

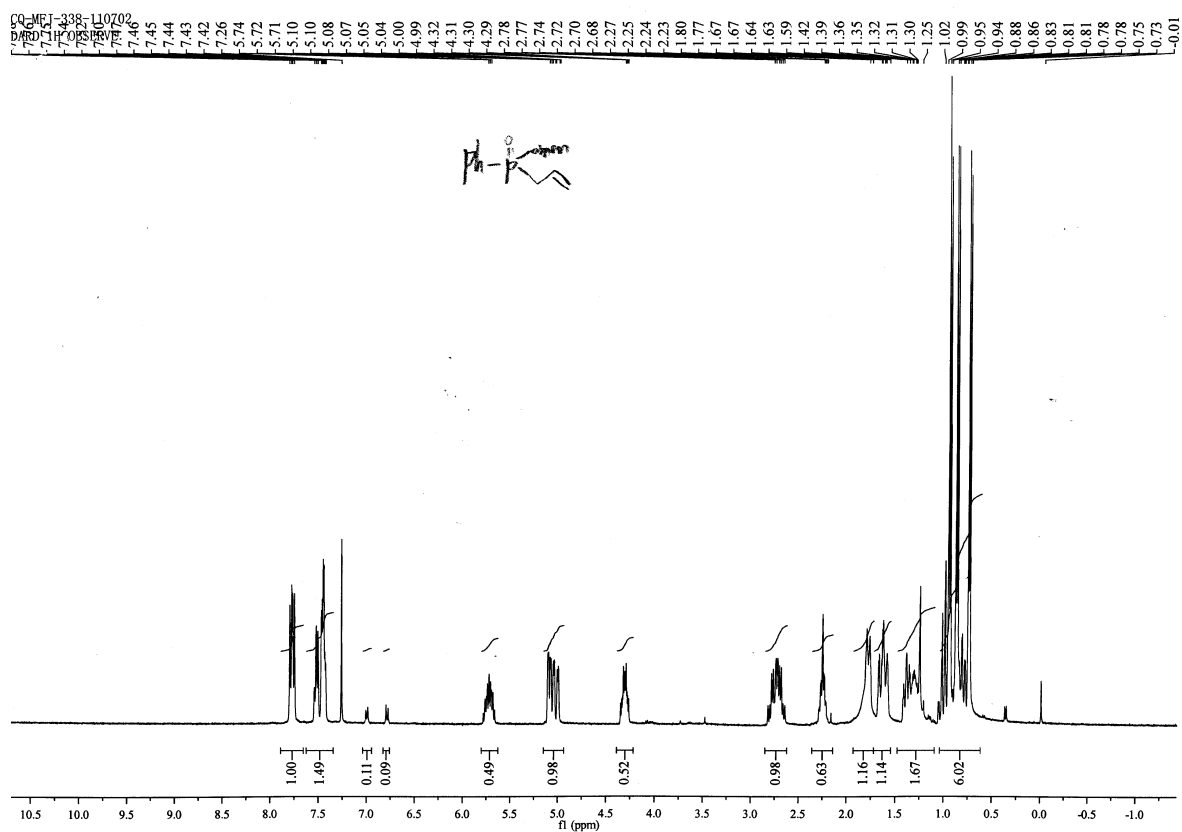

**(*R*<sub>P</sub>)-*O*-Menthyl allylphenylphosphinate (12i')**

QC-MFJ-338-110702  
PHORUS OBSERVE  
HARD PARAMETERS  
PHATE REGION

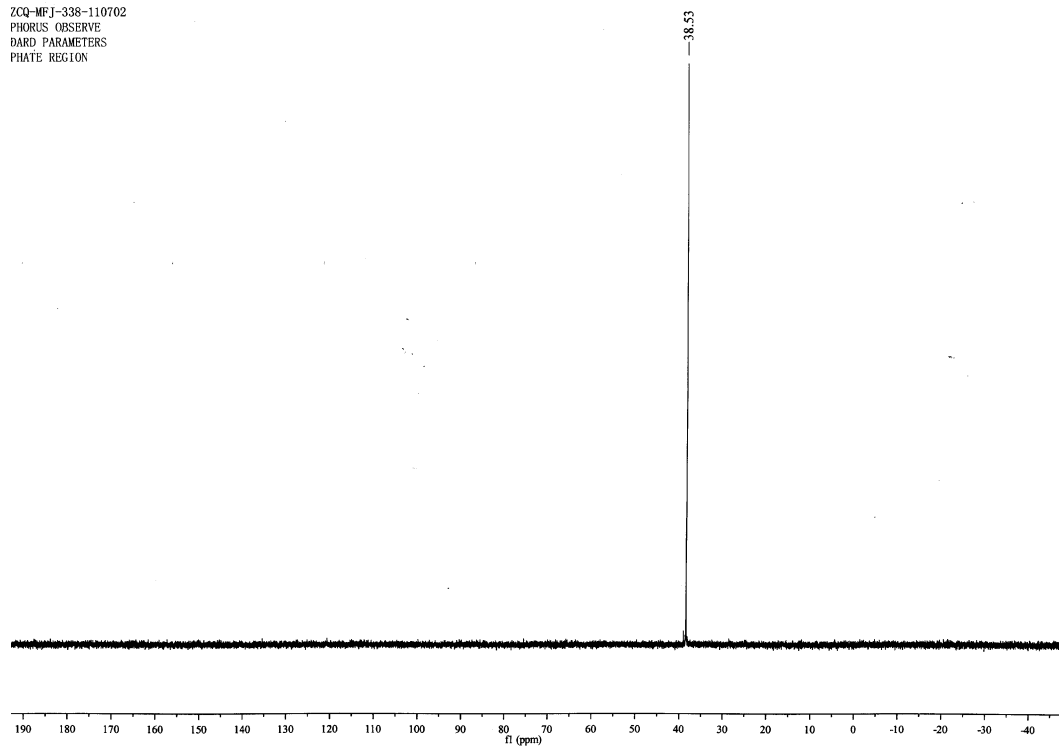

**(*R*<sub>P</sub>)-*O*-Menthyl allylphenylphosphinate (12i')**

ZCQ-MFJ-338-110702  
OBSERVE

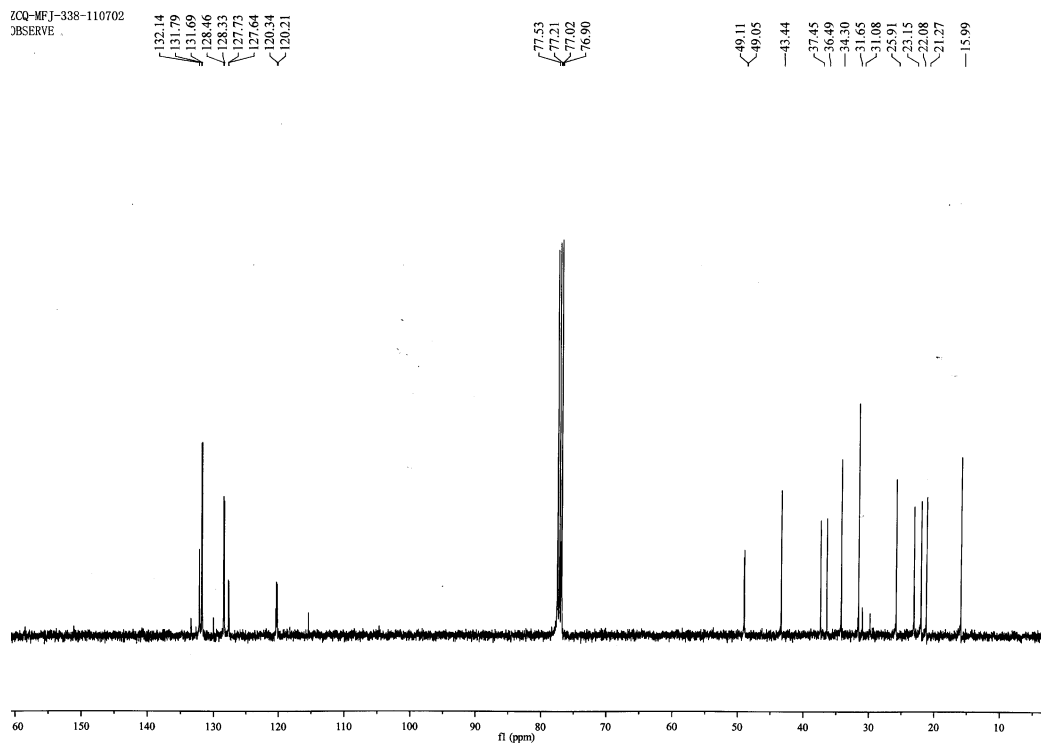

(S<sub>P</sub>)-O-Menthyl *p*-bromophenylphenylphosphinate (12j')

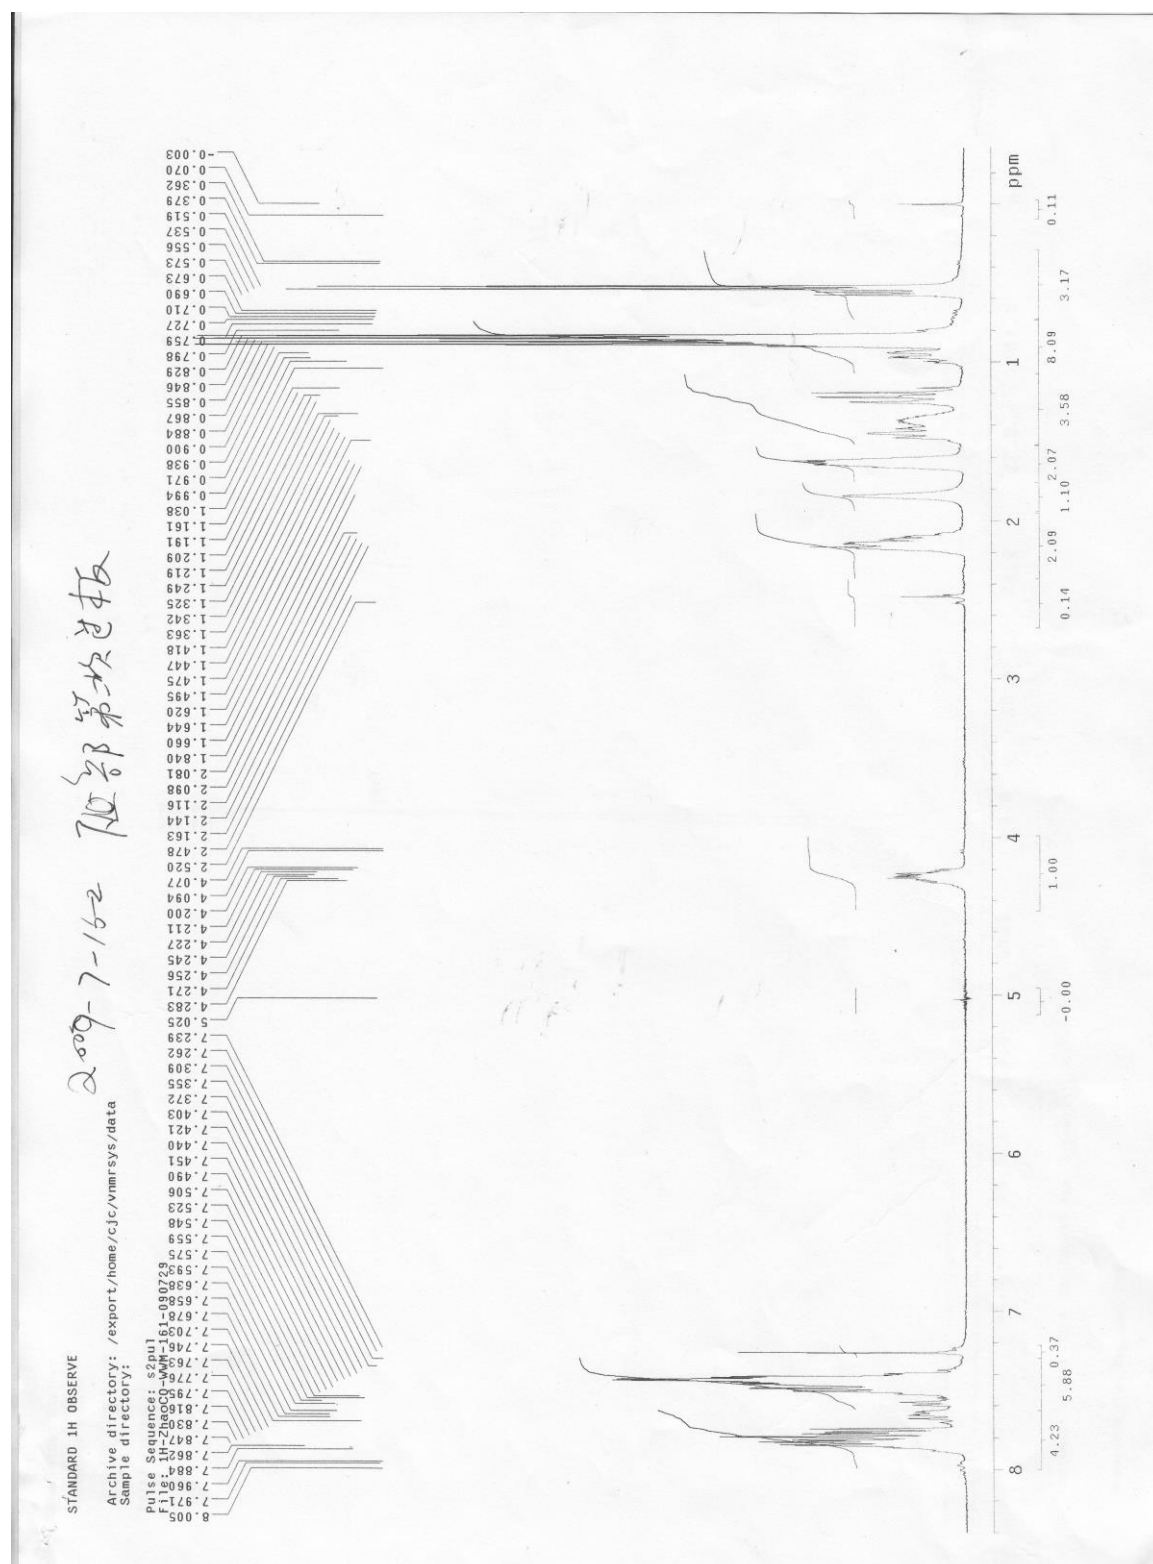





**(S<sub>P</sub>)-O-Menthyl *p*-methylphenylphenylphosphinate (12n')**

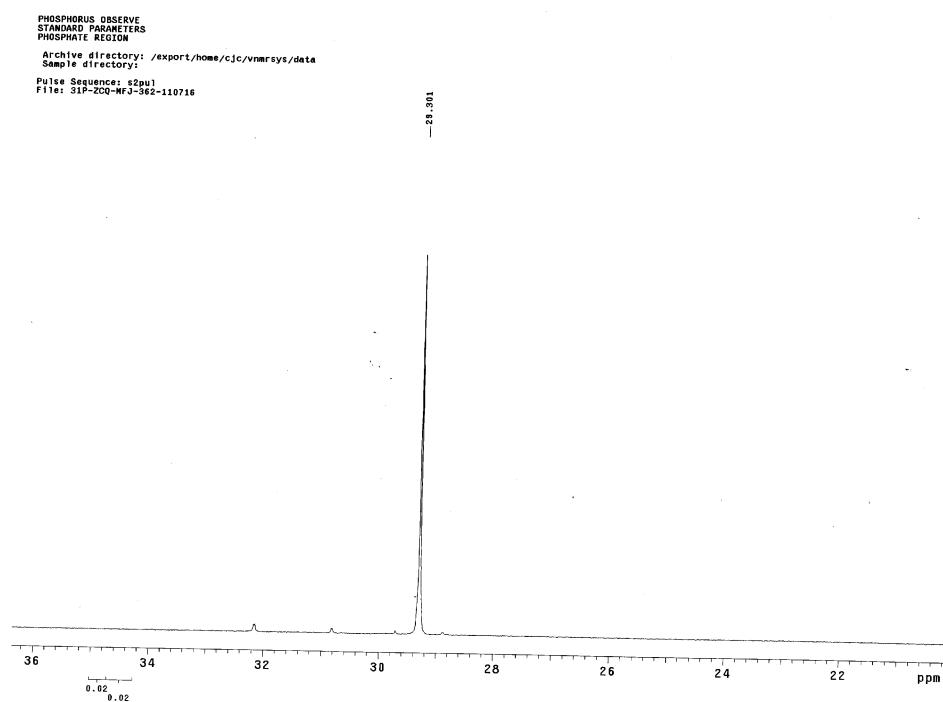

**(S<sub>P</sub>)-O-Menthyl *p*-methylphenylphenylphosphinate (12n')**

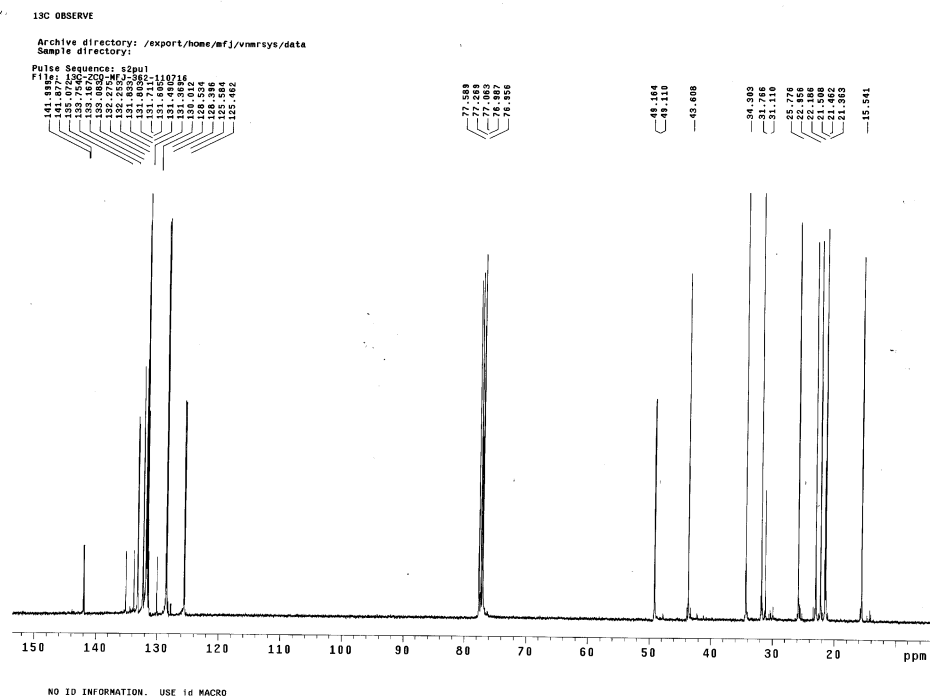



# Diethyl phenylphosphine oxide 13b

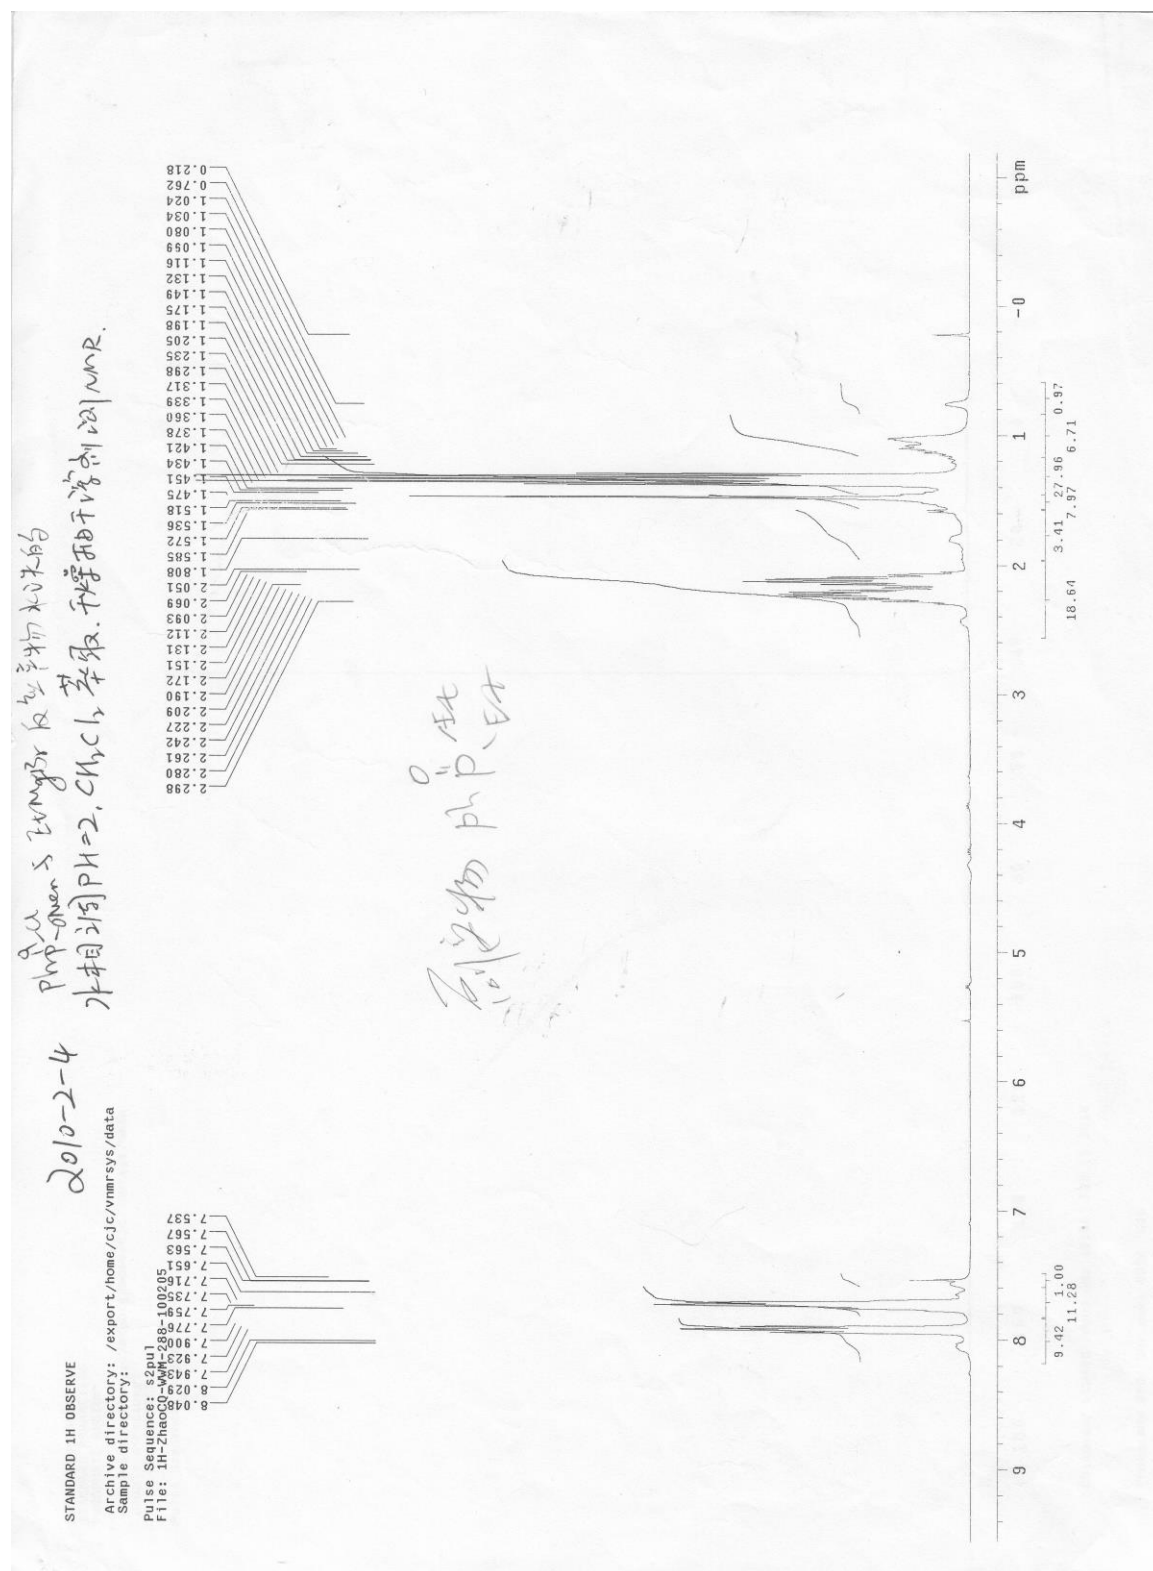

# Diethyl phenylphosphine oxide 13b

PHOSPHORUS OBSERVE  
STANDARD PARAMETERS  
PHOSPHATE REGION  
Archive directory: /export/home/cjc/vnmrsys/data  
Sample directory:  
File: PHOSPHORUS  
Pulse Sequence: s2pul

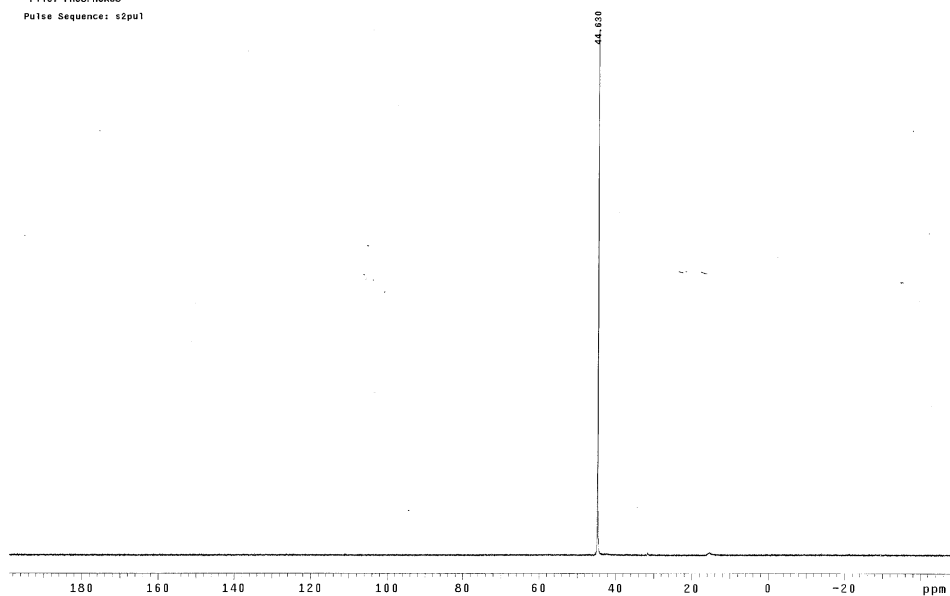

Customer: LCU400 Cons SN: 12186 Feb 5 2010

Probe:ASW PFG Ser num: 6094 c/c
